# Supplementary material for: Factors associated with non-attendance at appointments in the gastroenterology endoscopy unit: a retrospective cohort study
Source: PeerJ. 2022 Jul 25;10:e13518. doi: 10.7717/peerj.13518 (PMC9332409; doi:10.7717/peerj.13518)
Supplement: Supplemental Information 1 — Variables associated with non adherence to endoscopy appointments during COVID-19 pandemic lockdown period. [file peerj-10-13518-s001.xlsx]

## Sheet: Sayfa1
patient number	sex	age	marital status	intervention	appointment status	referring source	anesthesia	GEO DİSTANCE(km)	TRAVEL TİME(s)	TRAVEL TİME(min)	LEAD TİME	seoason	malignancy
1	1	47	1	2	1	1	0	345.76	14399.9	239.998	0	1	0
2	1	47	1	2	1	1	0	345.76	14399.9	239.998	0	1	0
3	1	47	1	2	1	1	0	345.76	14399.9	239.998	0	1	0
4	1	47	1	6	1	1	1	345.76	14399.9	239.998	0	1	0
5	1	58	1	2	1	1	0	5.23	547.9	9.13167	0	1	0
6	1	58	1	2	1	1	0	5.23	547.9	9.13167	0	1	0
7	1	58	1	1	1	1	0	5.23	547.9	9.13167	0	1	0
8	0	62	1	1	1	1	0	10.19	911.6	15.1933	0	1	0
9	0	61	1	2	1	1	0	21.6	1464.4	24.4067	0	1	0
10	0	61	1	1	1	1	0	21.6	1464.4	24.4067	0	1	0
11	1	67	1	5	1	1	0	874.71	37796.8	629.947	0	1	0
12	1	36	1	2	1	1	0	13.14	1070.9	17.8483	0	1	0
13	0	67	1	4	1	1	0	54.52	2897	48.2833	0	1	0
14	0	67	1	4	1	1	0	54.52	2897	48.2833	0	1	0
15	0	67	1	4	1	1	0	54.52	2897	48.2833	0	1	0
16	0	67	1	2	1	1	0	54.52	2897	48.2833	0	1	0
17	1	36	1	3	1	1	0	13.14	1070.9	17.8483	0	1	0
18	0	73	1	1	1	1	0	34.87	2766.1	46.1017	0	1	0
19	0	73	1	2	1	1	0	34.87	2766.1	46.1017	0	1	0
20	0	73	1	2	1	1	0	34.87	2766.1	46.1017	0	1	0
21	0	73	1	2	1	1	0	34.87	2766.1	46.1017	0	1	0
22	1	73	1	2	1	1	0	28.15	2080.4	34.6733	0	1	0
23	1	73	1	1	1	1	0	28.15	2080.4	34.6733	0	1	0
24	0	54	1	2	1	0	0	103.71	5156.4	85.94	0	1	0
25	1	54	1	4	1	1	0	79.64	4016.4	66.94	0	1	0
26	1	54	1	4	1	1	0	79.64	4016.4	66.94	0	1	0
27	1	54	1	4	1	1	0	79.64	4016.4	66.94	0	1	0
28	0	65	1	2	1	1	0	21.46	1651.5	27.525	0	1	0
29	0	65	1	2	1	1	0	21.46	1651.5	27.525	0	1	0
30	0	65	1	1	1	1	0	21.46	1651.5	27.525	0	1	0
31	1	66	0	4	1	1	0	51.66	4229	70.4833	0	1	0
32	1	66	0	4	1	1	0	51.66	4229	70.4833	0	1	0
33	1	66	0	2	1	1	0	51.66	4229	70.4833	0	1	0
34	0	63	1	4	1	1	0	23.14	1553	25.8833	0	1	0
35	0	63	1	4	1	1	1	23.14	1553	25.8833	0	1	0
36	0	63	1	2	1	1	0	23.14	1553	25.8833	0	1	0
37	0	63	1	2	1	1	0	23.14	1553	25.8833	0	1	0
38	0	63	1	2	1	1	0	23.14	1553	25.8833	0	1	0
39	1	48	1	4	1	1	0	18.98	1341.6	22.36	0	1	0
40	1	48	1	2	1	1	0	18.98	1341.6	22.36	0	1	0
41	1	48	1	4	1	1	0	18.98	1341.6	22.36	0	1	0
42	1	48	1	4	1	1	0	18.98	1341.6	22.36	0	1	0
43	0	74	0	4	1	1	0	26.54	1970.7	32.845	0	1	0
44	0	74	0	4	1	1	0	26.54	1970.7	32.845	0	1	0
45	1	64	1	5	1	1	0	1002.81	42895.3	714.922	0	1	0
46	1	38	1	3	1	1	0	18.05	1244.1	20.735	0	1	0
47	1	38	1	2	1	1	0	18.05	1244.1	20.735	0	1	0
48	1	38	1	3	1	1	0	18.05	1244.1	20.735	0	1	0
49	0	45	1	2	1	1	0	47.05	2701.3	45.0217	0	1	0
50	0	45	1	1	1	1	0	47.05	2701.3	45.0217	0	1	0
51	1	53	1	2	1	1	0	28.97	2191.8	36.53	0	1	0
52	1	53	1	1	1	1	0	28.97	2191.8	36.53	0	1	0
53	1	53	1	2	1	1	0	28.97	2191.8	36.53	0	1	0
54	1	52	1	5	1	1	0	31.09	2571.2	42.8533	0	1	0
55	0	65	1	2	1	1	0	21.46	1651.5	27.525	0	1	0
56	0	65	1	2	1	1	0	21.46	1651.5	27.525	0	1	0
57	0	65	1	1	1	1	0	21.46	1651.5	27.525	0	1	0
58	0	62	1	4	1	1	0	42.97	2903.5	48.3917	0	1	0
59	0	62	1	4	1	1	0	42.97	2903.5	48.3917	0	1	0
60	0	26	1	5	1	1	1	5.23	547.9	9.13167	0	1	0
61	1	36	1	3	1	1	0	22.26	1833.7	30.5617	0	1	0
62	1	36	1	2	1	1	0	22.26	1833.7	30.5617	0	1	0
63	0	30	1	3	1	1	0	15.92	1261.5	21.025	0	1	0
64	0	74	0	4	1	1	0	26.54	1970.7	32.845	0	1	0
65	0	74	0	4	1	1	0	26.54	1970.7	32.845	0	1	0
66	0	26	1	5	1	1	1	5.23	547.9	9.13167	0	1	0
67	1	65	1	2	1	1	0	5.23	547.9	9.13167	0	1	0
68	1	65	1	1	1	1	0	5.23	547.9	9.13167	0	1	0
69	1	65	1	2	1	1	0	5.23	547.9	9.13167	0	1	0
70	1	65	1	2	1	0	0	75.51	3850.8	64.18	0	1	0
71	1	58	1	1	1	1	0	26.43	1944.1	32.4017	0	1	0
72	0	60	1	2	1	1	0	62.67	4256.6	70.9433	0	1	0
73	0	60	1	4	1	1	0	62.67	4256.6	70.9433	0	1	0
74	0	60	1	4	1	1	0	62.67	4256.6	70.9433	0	1	0
75	1	62	1	2	1	1	0	5.23	547.9	9.13167	0	1	0
76	1	62	1	4	1	1	0	5.23	547.9	9.13167	0	1	0
77	1	62	1	5	1	1	1	12.49	1028.4	17.14	0	1	0
78	1	62	1	5	1	1	0	12.49	1028.4	17.14	2	1	0
79	0	66	0	2	1	1	0	8	705.7	11.7617	0	1	0
80	0	68	1	1	1	1	0	8	705.7	11.7617	0	1	0
81	0	65	1	2	1	1	0	43.05	2459.3	40.9883	0	1	0
82	0	65	1	1	1	1	0	43.05	2459.3	40.9883	0	1	0
83	0	65	1	2	1	1	0	43.05	2459.3	40.9883	0	1	0
84	1	55	1	2	1	1	0	5.23	547.9	9.13167	0	1	0
85	1	55	1	2	1	1	0	5.23	547.9	9.13167	0	1	0
86	1	55	1	2	1	1	0	5.23	547.9	9.13167	0	1	0
87	0	51	1	2	1	1	0	20.3	1422.3	23.705	0	1	0
88	0	51	1	1	1	1	0	20.3	1422.3	23.705	0	1	0
89	0	51	1	2	1	1	0	20.3	1422.3	23.705	0	1	0
90	1	25	0	2	1	1	0	21.52	1759.8	29.33	0	1	0
91	1	25	0	2	1	1	0	21.52	1759.8	29.33	0	1	0
92	1	25	0	2	1	1	0	21.52	1759.8	29.33	0	1	0
93	1	48	0	2	1	1	0	22.59	1708.2	28.47	0	1	0
94	1	48	0	1	1	1	0	22.59	1708.2	28.47	0	1	0
95	1	48	0	2	1	1	0	22.59	1708.2	28.47	0	1	0
96	0	66	1	2	1	1	0	12.37	1019.1	16.985	0	1	0
97	0	66	1	1	1	1	0	12.37	1019.1	16.985	0	1	0
98	0	55	1	1	1	1	0	114.36	5523.9	92.065	0	1	0
99	0	55	1	2	1	1	0	114.36	5523.9	92.065	0	1	0
100	0	55	1	2	1	1	0	114.36	5523.9	92.065	0	1	0
101	1	66	1	4	1	1	0	21.46	1651.5	27.525	0	1	0
102	1	66	1	4	1	1	0	21.46	1651.5	27.525	0	1	0
103	1	66	1	2	1	1	0	21.46	1651.5	27.525	0	1	0
104	1	35	1	2	1	1	0	48.75	2490.6	41.51	0	1	0
105	1	35	1	2	1	1	0	48.75	2490.6	41.51	0	1	0
106	1	35	1	2	1	1	0	48.75	2490.6	41.51	0	1	0
107	1	60	1	3	1	1	0	55.74	3000.5	50.0083	0	1	0
108	1	56	1	5	1	1	0	157.97	7825.9	130.432	0	1	0
109	0	57	1	2	1	1	0	16.46	1355.9	22.5983	0	1	0
110	0	57	1	3	1	1	0	16.46	1355.9	22.5983	0	1	0
111	0	32	0	3	1	1	0	250.64	11742.7	195.712	0	1	0
112	1	62	1	1	1	1	0	19.52	1366.7	22.7783	0	1	0
113	1	62	1	2	1	1	0	19.52	1366.7	22.7783	0	1	0
114	1	62	1	2	1	1	0	19.52	1366.7	22.7783	0	1	0
115	1	47	1	4	1	1	0	51.66	4229	70.4833	0	1	0
116	1	47	1	4	1	1	0	51.66	4229	70.4833	0	1	0
117	1	47	1	4	1	1	0	51.66	4229	70.4833	0	1	0
118	0	74	1	4	1	1	1	24.89	1852.6	30.8767	0	1	0
119	0	74	1	4	1	1	0	24.89	1852.6	30.8767	0	1	0
120	0	74	1	4	1	1	0	24.89	1852.6	30.8767	0	1	0
121	0	74	1	2	1	1	0	24.89	1852.6	30.8767	0	1	0
122	0	80	1	4	1	1	0	35.01	2778.6	46.31	0	1	1
123	0	80	1	4	1	1	0	35.01	2778.6	46.31	0	1	0
124	1	62	1	2	1	1	0	19.52	1366.7	22.7783	0	1	0
125	1	62	1	2	1	1	0	5.23	547.9	9.13167	0	1	0
126	0	74	1	2	1	1	0	26.16	1907.1	31.785	0	1	0
127	0	74	1	4	1	1	0	26.16	1907.1	31.785	0	1	0
128	0	74	1	4	1	1	0	26.16	1907.1	31.785	0	1	0
129	0	74	1	4	1	1	0	26.16	1907.1	31.785	0	1	0
130	0	59	1	2	1	1	0	18.77	1541.2	25.6867	0	1	0
131	0	59	1	4	1	1	0	18.77	1541.2	25.6867	0	1	0
132	0	59	1	4	1	1	0	18.77	1541.2	25.6867	0	1	0
133	0	64	1	1	1	1	0	5.23	547.9	9.13167	0	1	0
134	0	64	1	2	1	1	0	5.23	547.9	9.13167	0	1	0
135	0	64	1	2	1	1	0	5.23	547.9	9.13167	0	1	0
136	1	87	1	4	1	1	0	5.23	547.9	9.13167	0	1	0
137	1	87	1	4	1	1	0	5.23	547.9	9.13167	0	1	0
138	1	87	1	4	1	1	0	5.23	547.9	9.13167	0	1	0
139	1	87	1	2	1	1	0	5.23	547.9	9.13167	0	1	0
140	1	56	1	1	1	1	0	23.89	1925	32.0833	0	1	0
141	1	56	1	2	1	1	0	23.89	1925	32.0833	0	1	0
142	1	56	1	2	1	1	0	23.89	1925	32.0833	0	1	0
143	0	76	1	4	1	0	0	60.59	3274.1	54.5683	0	1	0
144	0	76	1	4	1	0	0	60.59	3274.1	54.5683	0	1	0
145	0	76	1	2	1	0	0	60.59	3274.1	54.5683	0	1	0
146	1	54	1	4	1	1	0	14.04	1198.7	19.9783	0	1	0
147	1	54	1	4	1	1	0	14.04	1198.7	19.9783	0	1	0
148	1	54	1	2	1	1	0	14.04	1198.7	19.9783	0	1	0
149	1	54	1	4	1	1	0	14.04	1198.7	19.9783	0	1	0
150	0	82	0	4	1	1	1	7.56	619.4	10.3233	5	1	0
151	0	82	0	4	1	1	0	7.56	619.4	10.3233	0	1	0
152	0	82	0	4	1	1	0	7.56	619.4	10.3233	0	1	0
153	1	59	1	2	1	0	0	51.26	2760.9	46.015	0	1	0
154	1	59	1	1	1	0	0	51.26	2760.9	46.015	0	1	0
155	0	76	1	2	1	1	0	8.63	759.5	12.6583	0	1	0
156	0	76	1	1	1	1	0	8.63	759.5	12.6583	0	1	0
157	0	76	1	2	1	1	0	8.63	759.5	12.6583	0	1	0
158	0	36	1	3	1	1	0	10.77	917	15.2833	0	1	0
159	1	46	1	2	1	1	0	43.05	2459.3	40.9883	0	1	0
160	1	46	1	3	1	1	0	43.05	2459.3	40.9883	0	1	0
161	1	54	1	2	1	1	0	8.52	717.9	11.965	0	1	0
162	1	54	1	1	1	1	0	8.52	717.9	11.965	0	1	0
163	1	54	1	2	1	1	0	8.52	717.9	11.965	0	1	0
164	1	48	1	2	1	1	0	9.16	816.6	13.61	0	1	0
165	1	48	1	1	1	1	0	9.16	816.6	13.61	0	1	0
166	1	48	1	2	1	1	0	9.16	816.6	13.61	0	1	0
167	0	62	1	5	1	1	1	78.56	4054.8	67.58	0	1	0
168	1	48	1	3	1	1	0	10.53	905.9	15.0983	0	1	0
169	1	48	1	2	1	1	0	10.53	905.9	15.0983	0	1	0
170	0	52	1	2	1	1	0	27.97	2041.9	34.0317	0	1	0
171	1	45	1	4	1	1	0	56.58	3004.1	50.0683	0	1	0
172	1	45	1	4	1	1	0	56.58	3004.1	50.0683	0	1	0
173	1	45	1	4	1	1	0	56.58	3004.1	50.0683	0	1	0
174	0	65	0	2	1	1	0	5.23	547.9	9.13167	0	1	0
175	0	65	0	1	1	1	0	5.23	547.9	9.13167	0	1	0
176	1	81	0	4	1	1	0	46.88	2845.5	47.425	0	1	0
177	1	60	1	4	1	1	0	82.3	4139.6	68.9933	0	1	0
178	1	60	1	4	1	1	0	82.3	4139.6	68.9933	0	1	0
179	1	60	1	4	1	1	0	82.3	4139.6	68.9933	0	1	0
180	0	80	1	4	1	1	0	35.01	2778.6	46.31	0	1	0
181	0	80	1	2	1	1	0	35.01	2778.6	46.31	0	1	0
182	0	80	1	4	1	1	0	35.01	2778.6	46.31	0	1	0
183	0	80	1	4	1	1	0	35.01	2778.6	46.31	0	1	0
184	1	62	1	2	1	1	0	21.6	1464.4	24.4067	0	1	0
185	1	62	1	1	1	1	0	21.6	1464.4	24.4067	0	1	0
186	1	87	0	2	1	1	0	5.23	547.9	9.13167	0	1	0
187	1	87	0	1	1	1	0	5.23	547.9	9.13167	0	1	0
188	0	31	1	1	1	1	0	18.07	1269.8	21.1633	0	1	0
189	0	31	1	2	1	1	0	18.07	1269.8	21.1633	0	1	0
190	1	74	0	2	1	1	0	9.16	816.6	13.61	0	1	0
191	1	74	0	2	1	1	0	9.16	816.6	13.61	0	1	0
192	0	31	1	3	1	0	0	74.19	3759.2	62.6533	2	1	1
193	0	31	1	2	1	0	0	74.19	3759.2	62.6533	2	1	1
194	0	48	1	3	1	1	0	12.65	1096.1	18.2683	0	1	0
195	0	48	1	2	1	1	0	12.65	1096.1	18.2683	0	1	0
196	1	52	1	3	1	1	0	12.58	1074.9	17.915	0	1	0
197	0	32	1	3	1	1	0	30.6	2422.2	40.37	0	1	0
198	0	32	1	2	1	1	0	30.6	2422.2	40.37	0	1	0
199	0	65	1	1	1	1	0	131.97	6072.2	101.203	0	1	0
200	0	65	1	2	1	1	0	131.97	6072.2	101.203	0	1	0
201	0	65	1	2	1	1	0	131.97	6072.2	101.203	0	1	0
202	1	75	1	2	1	1	0	61.11	3235.8	53.93	0	1	0
203	1	72	0	2	1	1	0	32.18	2426.6	40.4433	0	1	0
204	1	72	0	2	1	1	0	32.18	2426.6	40.4433	0	1	0
205	1	72	0	1	1	1	0	32.18	2426.6	40.4433	0	1	0
206	0	64	1	2	1	1	0	56.42	2979.5	49.6583	0	1	0
207	1	65	1	2	1	1	0	5.23	547.9	9.13167	0	1	0
208	1	65	1	2	1	1	0	5.23	547.9	9.13167	0	1	0
209	1	65	1	1	1	1	0	5.23	547.9	9.13167	0	1	0
210	1	62	1	2	1	1	0	16.87	1147.6	19.1267	0	1	0
211	1	67	1	1	1	1	0	10.19	911.6	15.1933	0	1	0
212	1	67	1	2	1	1	0	10.19	911.6	15.1933	0	1	0
213	1	67	1	2	1	1	0	10.19	911.6	15.1933	0	1	0
214	1	57	1	5	1	1	0	95.96	5001.6	83.36	6	1	0
215	0	48	1	1	1	1	0	107.44	5427.2	90.4533	0	1	0
216	0	32	1	3	1	1	0	21.6	1464.4	24.4067	0	1	0
217	0	32	1	2	1	1	0	21.6	1464.4	24.4067	0	1	0
218	1	55	1	3	1	1	0	9.74	842	14.0333	0	1	0
219	1	55	1	2	1	1	0	9.74	842	14.0333	0	1	0
220	1	57	1	3	1	1	0	28.15	2080.4	34.6733	0	1	0
221	1	44	1	3	1	1	0	84.34	4310.5	71.8417	0	1	0
222	0	31	1	2	1	1	0	54.76	2910.6	48.51	0	1	0
223	0	31	1	2	1	1	0	54.76	2910.6	48.51	0	1	0
224	1	49	1	3	1	1	0	20.04	1656.1	27.6017	0	1	0
225	1	49	1	2	1	1	0	20.04	1656.1	27.6017	0	1	0
226	0	70	0	1	1	1	0	123.33	5984.1	99.735	0	1	0
227	0	70	0	2	1	1	0	123.33	5984.1	99.735	0	1	0
228	0	70	0	2	1	1	0	123.33	5984.1	99.735	0	1	0
229	0	70	0	2	1	1	0	123.33	5984.1	99.735	0	1	0
230	0	74	1	2	1	1	0	60.42	3080.5	51.3417	0	1	0
231	0	68	1	2	1	1	0	58.42	3086.6	51.4433	0	1	0
232	0	68	1	1	1	1	0	58.42	3086.6	51.4433	0	1	0
233	0	68	1	2	1	1	0	58.42	3086.6	51.4433	0	1	0
234	0	57	1	2	1	1	0	25.52	1555	25.9167	0	1	0
235	0	57	1	2	1	1	0	25.52	1555	25.9167	0	1	0
236	0	57	1	1	1	1	0	25.52	1555	25.9167	0	1	0
237	0	63	1	2	1	1	0	16.5	1287.8	21.4633	0	1	0
238	0	77	1	4	1	1	0	100.85	4837.7	80.6283	0	1	0
239	0	77	1	4	1	1	0	100.85	4837.7	80.6283	0	1	0
240	0	77	1	4	1	1	0	100.85	4837.7	80.6283	0	1	0
241	0	77	1	4	1	1	0	100.85	4837.7	80.6283	0	1	0
242	0	28	0	4	1	1	0	1222.08	50715.2	845.253	0	1	0
243	0	28	0	4	1	1	0	1222.08	50715.2	845.253	0	1	0
244	0	28	0	4	1	1	0	1222.08	50715.2	845.253	0	1	0
245	0	74	1	2	1	1	0	26.16	1907.1	31.785	0	1	0
246	1	62	1	2	1	1	0	12.49	1028.4	17.14	0	1	0
247	0	76	1	2	1	1	0	10.37	905.8	15.0967	0	1	0
248	0	76	1	1	1	1	0	10.37	905.8	15.0967	0	1	0
249	0	76	1	2	1	1	0	10.37	905.8	15.0967	0	1	0
250	1	55	1	5	1	1	0	23.14	1553	25.8833	0	1	0
251	1	28	1	3	1	1	0	7.37	715.1	11.9183	0	1	0
252	1	61	1	3	1	1	0	194.31	9452	157.533	0	1	0
253	0	56	1	3	1	1	0	25.3	2245.2	37.42	0	1	0
254	1	38	1	3	1	1	0	18.05	1244.1	20.735	0	1	0
255	1	38	1	2	1	1	0	18.98	1341.6	22.36	0	1	0
256	1	38	1	3	1	1	0	18.98	1341.6	22.36	0	1	0
257	1	54	1	2	1	1	0	14.04	1198.7	19.9783	0	1	0
258	0	65	1	1	1	1	0	56.13	2779.9	46.3317	0	1	0
259	0	65	1	2	1	1	0	56.13	2779.9	46.3317	0	1	0
260	0	65	1	2	1	1	0	56.13	2779.9	46.3317	0	1	0
261	0	64	1	1	1	0	0	60.99	3186.2	53.1033	0	1	0
262	0	54	1	2	1	1	0	963.9	40949.4	682.49	0	1	0
263	0	54	1	3	1	1	0	963.9	40949.4	682.49	0	1	0
264	1	31	1	4	1	1	0	22.26	1833.7	30.5617	0	1	0
265	1	31	1	4	1	1	0	22.26	1833.7	30.5617	0	1	0
266	1	31	1	4	1	1	0	22.26	1833.7	30.5617	0	1	0
267	0	73	1	2	1	1	0	20.58	1471.9	24.5317	0	1	0
268	0	73	1	2	1	1	0	20.58	1471.9	24.5317	0	1	0
269	0	73	1	1	1	1	0	20.58	1471.9	24.5317	0	1	0
270	1	28	1	2	1	1	0	7.37	715.1	11.9183	0	1	0
271	0	71	1	2	1	1	0	23.89	1925	32.0833	0	1	0
272	0	71	1	2	1	1	0	23.89	1925	32.0833	0	1	0
273	0	71	1	1	1	1	0	23.89	1925	32.0833	0	1	0
274	0	74	1	2	1	1	0	60.42	3080.5	51.3417	0	1	0
275	1	69	1	1	1	1	0	10.08	902.7	15.045	0	1	0
276	1	69	1	2	1	1	0	10.08	902.7	15.045	0	1	0
277	1	69	1	2	1	1	0	10.08	902.7	15.045	0	1	0
278	1	57	1	2	1	1	0	95.96	5001.6	83.36	0	1	0
279	0	47	0	1	1	1	0	19.52	1366.7	22.7783	0	1	0
280	0	66	1	2	1	1	0	993.6	39800.3	663.338	0	1	0
281	0	66	1	1	1	1	0	993.6	39800.3	663.338	0	1	0
282	0	66	1	2	1	1	0	993.6	39800.3	663.338	0	1	0
283	1	77	0	1	1	1	0	7.25	624.6	10.41	0	1	0
284	1	77	0	2	1	1	0	7.25	624.6	10.41	0	1	0
285	1	77	0	2	1	1	0	7.25	624.6	10.41	0	1	0
286	0	37	1	6	1	1	1	55.56	2973	49.55	0	1	0
287	1	54	1	1	1	1	0	24.88	1875	31.25	0	1	0
288	1	41	1	4	1	1	0	24.02	1543.2	25.72	0	1	0
289	1	41	1	4	1	1	0	24.02	1543.2	25.72	0	1	0
290	1	41	1	4	1	1	0	24.02	1543.2	25.72	0	1	0
291	0	55	0	1	1	0	0	472.09	18678.1	311.302	0	1	0
292	1	30	1	4	1	1	0	46.88	2845.5	47.425	0	1	0
293	1	30	1	4	1	1	0	46.88	2845.5	47.425	0	1	0
294	1	30	1	4	1	1	0	46.88	2845.5	47.425	0	1	0
295	0	59	1	2	1	1	0	302.77	15032.1	250.535	0	1	0
296	0	59	1	4	1	1	0	302.77	15032.1	250.535	0	1	0
297	0	59	1	4	1	1	0	302.77	15032.1	250.535	0	1	0
298	0	57	1	2	1	1	0	83.99	4168.9	69.4817	0	1	0
299	0	57	1	1	1	1	0	83.99	4168.9	69.4817	0	1	0
300	0	57	1	2	1	1	0	83.99	4168.9	69.4817	0	1	0
301	0	36	1	2	1	1	0	17.72	1212.2	20.2033	0	1	0
302	0	36	1	1	1	1	0	17.72	1212.2	20.2033	0	1	0
303	0	36	1	2	1	1	0	17.72	1212.2	20.2033	0	1	0
304	1	41	1	4	1	1	0	24.02	1543.2	25.72	0	1	0
305	1	41	1	4	1	1	0	24.02	1543.2	25.72	0	1	0
306	1	41	1	4	1	1	0	24.02	1543.2	25.72	0	1	0
307	0	63	1	1	1	1	0	55.15	2898.4	48.3067	0	1	0
308	0	63	1	2	1	1	0	55.15	2898.4	48.3067	0	1	0
309	0	61	1	2	1	0	0	86.18	4298.9	71.6483	0	1	0
310	0	38	1	4	1	0	0	59.65	3143.8	52.3967	0	1	0
311	0	38	1	2	1	0	0	59.65	3143.8	52.3967	0	1	0
312	0	70	1	2	1	1	0	28.15	2209.8	36.83	0	1	0
313	0	70	1	4	1	1	0	28.15	2209.8	36.83	0	1	0
314	0	70	1	4	1	1	0	28.15	2209.8	36.83	0	1	0
315	0	38	1	4	1	0	0	59.65	3143.8	52.3967	0	1	0
316	0	61	1	4	1	0	0	86.18	4298.9	71.6483	0	1	0
317	0	61	1	4	1	0	0	86.18	4298.9	71.6483	0	1	0
318	1	62	1	1	1	1	0	16.87	1147.6	19.1267	1	1	0
319	1	62	1	2	1	1	0	16.87	1147.6	19.1267	1	1	0
320	1	67	1	2	1	1	0	119.85	6437.8	107.297	0	1	0
321	1	67	1	4	1	1	0	119.85	6437.8	107.297	0	1	0
322	1	67	1	2	1	1	0	119.85	6437.8	107.297	0	1	0
323	1	67	1	4	1	1	0	119.85	6437.8	107.297	0	1	0
324	1	67	1	4	1	1	0	119.85	6437.8	107.297	0	1	0
325	0	46	1	4	1	1	0	14.04	1198.7	19.9783	0	1	0
326	0	46	1	4	1	1	0	14.04	1198.7	19.9783	0	1	0
327	0	46	1	2	1	1	0	14.04	1198.7	19.9783	0	1	0
328	0	29	0	4	1	1	0	82.09	4506.4	75.1067	0	1	0
329	0	29	0	4	1	1	0	82.09	4506.4	75.1067	0	1	0
330	0	29	0	2	1	1	0	82.09	4506.4	75.1067	0	1	0
331	0	64	1	4	1	1	0	57.65	3995.6	66.5933	0	1	0
332	0	64	1	2	1	1	0	57.65	3995.6	66.5933	0	1	0
333	0	64	1	4	1	1	0	57.65	3995.6	66.5933	0	1	0
334	0	64	1	4	1	1	0	57.65	3995.6	66.5933	0	1	0
335	0	55	1	1	1	1	0	21.93	1461.9	24.365	0	1	0
336	0	55	1	1	1	1	0	21.93	1461.9	24.365	0	1	0
337	0	55	1	2	1	1	0	21.93	1461.9	24.365	0	1	0
338	0	78	1	1	1	1	0	8.83	735.7	12.2617	0	1	0
339	0	39	0	1	1	0	0	57.59	3082.8	51.38	0	1	0
340	0	38	1	2	1	0	0	59.65	3143.8	52.3967	0	1	0
341	0	38	1	4	1	0	0	59.65	3143.8	52.3967	0	1	0
342	0	38	1	4	1	0	0	59.65	3143.8	52.3967	1	1	0
343	1	65	1	4	1	1	0	9.47	909.2	15.1533	0	1	0
344	1	65	1	4	1	1	0	9.47	909.2	15.1533	0	1	0
345	1	65	1	4	1	1	0	9.47	909.2	15.1533	0	1	0
346	1	65	1	2	1	1	0	9.47	909.2	15.1533	0	1	0
347	1	71	0	4	1	1	0	21.6	1464.4	24.4067	0	1	0
348	1	71	0	4	1	1	0	21.6	1464.4	24.4067	0	1	0
349	1	71	0	4	1	1	0	21.6	1464.4	24.4067	0	1	0
350	1	71	0	2	1	1	0	21.6	1464.4	24.4067	0	1	0
351	0	73	1	4	1	1	0	16.87	1147.6	19.1267	0	1	0
352	0	73	1	4	1	1	0	16.87	1147.6	19.1267	0	1	0
353	0	73	1	4	1	1	0	16.87	1147.6	19.1267	0	1	0
354	0	73	1	2	1	1	0	16.87	1147.6	19.1267	0	1	0
355	0	70	1	2	1	1	0	28.15	2209.8	36.83	0	1	0
356	0	70	1	4	1	1	0	28.15	2209.8	36.83	0	1	0
357	0	70	1	4	1	1	0	28.15	2209.8	36.83	0	1	0
358	0	70	1	2	1	1	0	28.15	2209.8	36.83	0	1	0
359	0	41	1	1	1	1	0	107.44	5427.2	90.4533	0	1	0
360	1	69	0	4	1	1	0	47.05	2701.3	45.0217	0	1	0
361	1	69	0	4	1	1	0	47.05	2701.3	45.0217	0	1	0
362	1	69	0	4	1	1	0	47.05	2701.3	45.0217	0	1	0
363	0	37	0	4	1	1	0	8.83	735.7	12.2617	0	1	0
364	0	37	0	4	1	1	0	8.83	735.7	12.2617	0	1	0
365	0	37	0	2	1	1	0	8.83	735.7	12.2617	0	1	0
366	0	64	1	1	1	0	0	161.53	7464.1	124.402	0	1	0
367	0	64	1	2	1	0	0	161.53	7464.1	124.402	0	1	0
368	1	63	1	2	1	1	0	16.87	1147.6	19.1267	0	1	0
369	1	63	1	1	1	1	0	16.87	1147.6	19.1267	0	1	0
370	0	69	1	2	1	0	0	21.46	1651.5	27.525	0	1	0
371	0	69	1	4	1	0	0	21.46	1651.5	27.525	0	1	0
372	0	69	1	4	1	0	0	21.46	1651.5	27.525	0	1	0
373	0	80	1	2	1	1	0	35.01	2778.6	46.31	0	1	0
374	0	80	1	2	1	1	0	35.01	2778.6	46.31	0	1	0
375	0	80	1	4	1	1	0	35.01	2778.6	46.31	0	1	0
376	0	80	1	4	1	1	0	35.01	2778.6	46.31	0	1	0
377	1	74	1	2	1	1	0	10.08	902.7	15.045	0	1	0
378	0	88	1	2	1	0	0	8	705.7	11.7617	0	1	0
379	0	81	0	4	1	1	0	18.46	1477.9	24.6317	0	1	0
380	0	61	1	4	1	1	0	24.12	1957.8	32.63	0	1	0
381	0	61	1	4	1	1	0	24.12	1957.8	32.63	0	1	0
382	0	61	1	2	1	1	0	24.12	1957.8	32.63	0	1	0
383	0	61	1	4	1	1	0	24.12	1957.8	32.63	0	1	0
384	1	24	0	1	1	1	0	1108.99	47515.4	791.923	0	1	0
385	1	94	0	4	1	1	0	1437.43	65609.8	1093.5	0	1	0
386	1	94	0	4	1	1	0	1437.43	65609.8	1093.5	0	1	0
387	1	94	0	4	1	1	0	1437.43	65609.8	1093.5	0	1	0
388	1	94	0	4	1	1	0	1437.43	65609.8	1093.5	0	1	0
389	1	25	1	4	1	1	0	18.46	1477.9	24.6317	0	1	0
390	1	25	1	4	1	1	0	18.46	1477.9	24.6317	0	1	0
391	1	25	1	4	1	1	0	18.46	1477.9	24.6317	0	1	0
392	0	61	1	2	1	1	0	24.12	1957.8	32.63	0	1	0
393	0	70	1	4	1	1	0	21.46	1651.5	27.525	0	1	0
394	0	70	1	2	1	1	0	21.46	1651.5	27.525	0	1	0
395	1	83	0	2	1	0	0	19.52	1366.7	22.7783	0	1	0
396	0	73	1	2	1	0	0	25.3	2245.2	37.42	0	1	0
397	0	72	0	2	1	0	0	21.52	1759.8	29.33	0	1	0
398	0	57	1	1	1	1	0	137.76	6434.1	107.235	0	1	0
399	0	57	1	2	1	1	0	137.76	6434.1	107.235	0	1	0
400	0	57	1	2	1	1	0	137.76	6434.1	107.235	0	1	0
401	0	81	0	2	1	1	0	51.66	4229	70.4833	1	1	0
402	0	81	0	2	1	1	0	51.66	4229	70.4833	0	1	0
403	0	42	1	2	1	1	0	21.93	1461.9	24.365	0	1	0
404	1	84	0	4	1	1	0	5.23	547.9	9.13167	0	1	0
405	1	84	0	2	1	1	0	5.23	547.9	9.13167	0	1	0
406	1	84	0	4	1	1	0	5.23	547.9	9.13167	0	1	0
407	1	84	0	4	1	1	0	5.23	547.9	9.13167	0	1	0
408	0	76	1	6	1	1	1	22.04	1418.3	23.6383	0	1	0
409	1	27	1	7	1	1	0	64.97	3164.2	52.7367	0	1	0
410	1	58	1	1	1	1	0	16.08	1370.4	22.84	0	1	0
411	0	57	1	6	1	1	1	137.76	6434.1	107.235	0	1	0
412	0	63	1	4	1	0	0	51.07	2754.3	45.905	1	1	1
413	0	63	1	2	1	0	0	51.07	2754.3	45.905	0	1	0
414	0	63	1	4	1	0	0	51.07	2754.3	45.905	0	1	0
415	0	63	1	4	1	0	0	51.07	2754.3	45.905	0	1	0
416	0	29	0	4	1	1	0	82.09	4506.4	75.1067	0	1	0
417	0	29	0	4	1	1	0	82.09	4506.4	75.1067	0	1	0
418	0	29	0	2	1	1	0	82.09	4506.4	75.1067	0	1	0
419	0	29	0	2	1	1	0	82.09	4506.4	75.1067	0	1	0
420	0	29	0	4	1	1	0	82.09	4506.4	75.1067	0	1	0
421	1	55	1	2	1	1	0	30.24	2244.6	37.41	0	1	0
422	1	55	1	2	1	1	0	30.24	2244.6	37.41	0	1	0
423	1	49	0	2	1	1	0	9.41	816.7	13.6117	0	1	0
424	1	66	0	2	1	1	0	51.66	4229	70.4833	0	1	0
425	1	66	0	4	1	1	0	51.66	4229	70.4833	0	1	0
426	1	66	0	4	1	1	0	51.66	4229	70.4833	0	1	0
427	1	66	0	4	1	1	0	51.66	4229	70.4833	0	1	0
428	0	38	1	2	1	1	0	59.65	3143.8	52.3967	0	1	0
429	0	38	1	2	1	1	0	59.65	3143.8	52.3967	0	1	0
430	0	38	1	4	1	1	0	59.65	3143.8	52.3967	0	1	0
431	0	38	1	4	1	1	0	59.65	3143.8	52.3967	0	1	0
432	0	38	1	4	1	1	0	59.65	3143.8	52.3967	0	1	0
433	1	80	0	4	1	1	1	42.97	2903.5	48.3917	7	1	1
434	1	80	0	4	1	1	0	42.97	2903.5	48.3917	0	1	0
435	0	82	1	4	1	1	1	78.49	4057.2	67.62	0	1	0
436	0	82	1	4	1	1	0	78.49	4057.2	67.62	0	1	0
437	0	82	1	4	1	1	0	78.49	4057.2	67.62	0	1	0
438	1	34	1	2	1	0	0	19.52	1366.7	22.7783	0	1	0
439	1	60	0	6	1	1	1	86.12	4407.6	73.46	1	1	0
440	1	86	0	4	1	1	0	46.18	2605.6	43.4267	0	1	0
441	1	86	0	4	1	1	0	46.18	2605.6	43.4267	0	1	0
442	1	86	0	4	1	1	0	46.18	2605.6	43.4267	0	1	0
443	0	80	1	4	1	1	0	47.54	2891.8	48.1967	0	1	0
444	0	80	1	2	1	1	0	47.54	2891.8	48.1967	0	1	0
445	0	80	1	4	1	1	0	47.54	2891.8	48.1967	0	1	0
446	0	80	1	4	1	1	0	47.54	2891.8	48.1967	0	1	0
447	0	55	1	4	1	1	0	81.59	4185.3	69.755	0	1	0
448	0	55	1	2	1	1	0	81.59	4185.3	69.755	0	1	0
449	0	55	1	2	1	1	0	81.59	4185.3	69.755	0	1	0
450	0	55	1	4	1	1	0	81.59	4185.3	69.755	0	1	0
451	0	67	0	2	1	1	0	8	705.7	11.7617	0	1	0
452	0	57	1	6	1	1	1	137.76	6434.1	107.235	1	1	0
453	1	32	0	2	1	0	0	20.44	1327	22.1167	0	1	0
454	0	85	0	2	1	0	0	22.42	2103.9	35.065	0	1	0
455	1	80	0	4	1	1	0	42.97	2903.5	48.3917	0	1	0
456	0	82	1	4	1	1	0	78.49	4057.2	67.62	0	1	0
457	0	55	1	4	1	1	0	89.99	4546.4	75.7733	0	1	0
458	0	48	1	4	1	1	0	30.24	2244.6	37.41	0	4	0
459	0	48	1	4	1	1	0	30.24	2244.6	37.41	0	4	0
460	0	48	1	2	1	1	0	30.24	2244.6	37.41	0	4	0
461	0	48	1	4	1	1	0	30.24	2244.6	37.41	0	4	0
462	1	52	1	2	1	1	0	143.63	6404.6	106.743	0	4	0
463	0	77	1	2	1	1	0	57.59	3082.8	51.38	1	4	0
464	0	77	1	1	1	1	0	57.59	3082.8	51.38	1	4	0
465	0	77	1	2	1	1	0	57.59	3082.8	51.38	1	4	0
466	1	55	1	3	1	1	0	19.52	1366.7	22.7783	1	4	0
467	1	55	1	2	1	1	0	19.52	1366.7	22.7783	1	4	0
468	0	65	1	3	1	1	0	34.87	2766.1	46.1017	1	4	0
469	0	65	1	2	1	1	0	34.87	2766.1	46.1017	1	4	0
470	0	51	1	3	1	1	0	30.6	2422.2	40.37	0	4	0
471	0	51	1	2	1	1	0	30.6	2422.2	40.37	0	4	0
472	1	39	1	3	1	1	0	103.71	5156.4	85.94	55	4	0
473	1	72	1	2	1	1	0	58.85	3114.8	51.9133	0	4	0
474	0	25	0	3	1	1	0	221.53	10709.5	178.492	0	4	0
475	1	68	1	4	1	0	0	13.39	1340.9	22.3483	0	4	0
476	1	68	1	4	1	0	0	13.39	1340.9	22.3483	0	4	0
477	0	50	1	4	1	1	0	16.08	1370.4	22.84	6	4	0
478	0	50	1	2	1	1	0	16.08	1370.4	22.84	0	4	0
479	0	50	1	4	1	1	0	16.08	1370.4	22.84	0	4	0
480	0	82	1	4	1	1	0	9.41	816.7	13.6117	0	4	0
481	0	82	1	4	1	1	0	9.41	816.7	13.6117	0	4	0
482	1	20	0	3	1	1	0	54.76	2910.6	48.51	0	4	0
483	0	57	1	3	1	1	0	43.05	2459.3	40.9883	0	4	0
484	0	57	1	2	1	0	0	43.05	2459.3	40.9883	48	4	0
485	0	41	1	3	1	1	0	19.85	1356	22.6	43	4	0
486	0	41	1	2	1	1	0	19.85	1356	22.6	43	4	0
487	0	41	1	2	1	1	0	14.04	1198.7	19.9783	0	4	0
488	0	41	1	3	1	1	0	14.04	1198.7	19.9783	0	4	0
489	0	67	0	4	1	1	0	86.12	4407.6	73.46	0	4	0
490	0	67	0	2	1	1	0	86.12	4407.6	73.46	0	4	0
491	0	67	0	2	1	1	0	86.12	4407.6	73.46	0	4	0
492	0	67	0	4	1	1	0	86.12	4407.6	73.46	0	4	0
493	0	67	0	4	1	1	0	86.12	4407.6	73.46	0	4	0
494	1	73	1	2	1	1	0	1112.06	45722.2	762.037	0	4	0
495	1	73	1	2	1	1	0	1112.06	45722.2	762.037	0	4	0
496	1	73	1	1	1	1	0	1112.06	45722.2	762.037	0	4	0
497	1	73	1	2	1	1	0	1112.06	45722.2	762.037	0	4	0
498	0	55	1	1	1	1	0	18.98	1341.6	22.36	0	4	0
499	0	55	1	2	1	1	0	18.98	1341.6	22.36	0	4	0
500	0	69	1	4	1	1	0	8.63	759.5	12.6583	0	4	0
501	0	69	1	2	1	1	0	8.63	759.5	12.6583	0	4	0
502	0	69	1	4	1	1	0	8.63	759.5	12.6583	0	4	0
503	0	69	1	4	1	1	0	8.63	759.5	12.6583	0	4	0
504	0	30	0	3	1	1	0	191.65	9418.9	156.982	0	4	0
505	1	42	1	3	1	1	0	8.97	825.5	13.7583	0	4	0
506	0	47	1	3	1	1	0	485.56	22009.8	366.83	0	4	0
507	0	47	1	2	1	1	0	485.56	22009.8	366.83	0	4	0
508	1	35	1	3	1	1	0	23.37	1666.6	27.7767	0	4	0
509	1	35	1	2	1	1	0	23.37	1666.6	27.7767	0	4	0
510	1	43	1	3	1	1	0	175.46	8345.7	139.095	0	4	0
511	1	43	1	2	1	1	0	175.46	8345.7	139.095	0	4	0
512	0	50	1	1	1	1	0	1336.17	61377.2	1022.95	0	4	0
513	1	33	1	3	1	1	0	30.24	2244.6	37.41	0	4	0
514	1	33	1	2	1	1	0	30.24	2244.6	37.41	0	4	0
515	1	28	1	2	1	1	0	18.37	1471	24.5167	43	4	0
516	1	28	1	3	1	1	0	18.37	1471	24.5167	0	4	0
517	1	24	0	7	1	1	0	21.46	1651.5	27.525	0	4	0
518	1	36	1	7	1	1	0	11.08	1005	16.75	0	4	0
519	1	70	0	3	1	1	0	8.52	717.9	11.965	0	4	0
520	0	66	1	3	1	1	0	23.14	1553	25.8833	0	4	0
521	0	66	1	2	1	1	0	23.14	1553	25.8833	0	4	0
522	1	32	1	3	1	1	0	135.31	6265.4	104.423	0	4	0
523	0	70	1	1	1	1	0	21.46	1651.5	27.525	0	4	1
524	1	39	1	1	1	1	0	21.22	1639.5	27.325	0	4	0
525	0	65	1	4	1	1	0	84.34	4310.5	71.8417	0	4	0
526	0	65	1	4	1	1	0	84.34	4310.5	71.8417	0	4	0
527	0	65	1	4	1	1	0	84.34	4310.5	71.8417	0	4	0
528	0	36	1	4	1	1	0	80.14	4001.4	66.69	0	4	0
529	0	36	1	4	1	1	0	80.14	4001.4	66.69	0	4	0
530	0	36	1	4	1	1	0	80.14	4001.4	66.69	0	4	0
531	0	48	1	4	1	1	0	51.34	3009.2	50.1533	0	4	0
532	0	48	1	2	1	1	0	51.34	3009.2	50.1533	0	4	0
533	0	48	1	4	1	1	0	51.34	3009.2	50.1533	0	4	0
534	0	48	1	4	1	1	0	51.34	3009.2	50.1533	0	4	0
535	1	74	1	4	1	0	0	263.47	13188.1	219.802	0	4	0
536	1	74	1	2	1	0	0	263.47	13188.1	219.802	0	4	0
537	1	74	1	4	1	0	0	263.47	13188.1	219.802	0	4	0
538	0	75	1	7	1	1	0	17.53	1453.8	24.23	0	4	0
539	0	28	0	3	1	1	0	1191.89	46886.8	781.447	0	4	0
540	0	54	1	2	1	1	0	47.82	2921.3	48.6883	0	4	0
541	0	54	1	3	1	1	0	47.82	2921.3	48.6883	0	4	0
542	1	74	1	2	1	1	0	965.97	43027.1	717.118	0	4	0
543	1	74	1	1	1	1	0	965.97	43027.1	717.118	0	4	0
544	0	66	1	2	1	1	0	21.46	1651.5	27.525	0	4	0
545	0	66	1	2	1	1	0	21.46	1651.5	27.525	0	4	0
546	0	66	1	1	1	1	0	21.46	1651.5	27.525	0	4	0
547	0	66	1	2	1	1	0	21.46	1651.5	27.525	0	4	0
548	0	60	1	2	1	1	0	264.99	11095.5	184.925	0	4	0
549	0	60	1	2	1	1	0	264.99	11095.5	184.925	0	4	0
550	0	60	1	1	1	1	0	264.99	11095.5	184.925	0	4	0
551	0	60	1	2	1	1	0	264.99	11095.5	184.925	0	4	0
552	0	70	1	6	1	1	1	24.88	1875	31.25	0	4	0
553	0	41	1	5	1	1	0	16.79	1253.2	20.8867	0	4	0
554	1	59	0	2	1	1	0	19.38	1590.2	26.5033	0	4	0
555	1	59	0	1	1	1	0	19.38	1590.2	26.5033	0	4	0
556	1	50	1	6	1	1	1	22.04	1418.3	23.6383	0	4	0
557	1	43	1	3	1	1	0	14.57	1176.6	19.61	0	4	0
558	1	43	1	2	1	1	0	14.57	1176.6	19.61	0	4	0
559	0	46	1	3	1	1	0	10.37	905.8	15.0967	0	4	0
560	0	51	1	3	1	1	0	54.76	2910.6	48.51	0	4	0
561	1	66	1	2	1	1	0	42.97	2903.5	48.3917	0	4	0
562	0	64	1	3	1	1	0	5.23	547.9	9.13167	0	4	0
563	0	64	1	2	1	1	0	5.23	547.9	9.13167	0	4	0
564	1	74	0	1	1	1	0	8.83	735.7	12.2617	0	4	0
565	1	74	0	2	1	1	0	8.83	735.7	12.2617	0	4	0
566	0	46	1	5	1	1	0	26.48	2011.6	33.5267	0	4	0
567	1	67	1	1	1	1	0	17.72	1212.2	20.2033	0	4	0
568	1	38	1	3	1	1	0	145.1	6360.3	106.005	0	4	0
569	1	38	1	2	1	1	0	145.1	6360.3	106.005	0	4	0
570	1	44	1	3	1	1	0	8.65	1018.9	16.9817	0	4	0
571	1	44	1	2	1	1	0	8.65	1018.9	16.9817	0	4	0
572	1	38	1	7	1	1	0	22.04	1418.3	23.6383	0	4	0
573	1	48	1	2	1	1	0	18.11	1504.5	25.075	0	4	0
574	0	56	1	2	1	1	0	34.66	2236.6	37.2767	0	4	0
575	0	56	1	3	1	1	0	34.66	2236.6	37.2767	0	4	0
576	1	71	0	3	1	1	0	11.97	998.4	16.64	0	4	0
577	1	24	0	3	1	1	0	9.47	909.2	15.1533	0	4	0
578	1	24	0	2	1	1	0	9.47	909.2	15.1533	0	4	0
579	0	23	0	3	1	1	0	12.49	1028.4	17.14	0	4	0
580	0	23	0	2	1	1	0	12.49	1028.4	17.14	0	4	0
581	1	64	1	4	1	0	0	5.23	547.9	9.13167	0	4	0
582	1	75	1	4	1	0	0	17.72	1212.2	20.2033	0	4	0
583	1	46	1	3	1	1	0	51.66	4229	70.4833	0	4	0
584	1	46	1	2	1	1	0	51.66	4229	70.4833	0	4	0
585	1	62	1	2	1	1	0	76.22	3855	64.25	0	4	0
586	1	62	1	2	1	1	0	76.22	3855	64.25	0	4	0
587	1	62	1	2	1	1	0	76.22	3855	64.25	0	4	0
588	1	62	1	2	1	1	0	76.22	3855	64.25	0	4	0
589	0	63	1	5	1	1	0	19.53	1399.7	23.3283	0	4	0
590	0	63	1	5	1	1	1	19.53	1399.7	23.3283	0	4	0
591	1	27	1	3	1	1	0	62.31	3333.6	55.56	0	4	0
592	0	60	0	3	1	1	0	51.66	4229	70.4833	0	4	0
593	1	38	1	5	1	1	0	58.14	3094.8	51.58	0	4	0
594	1	53	0	3	1	1	0	8.48	769.6	12.8267	0	4	0
595	1	53	0	2	1	1	0	8.48	769.6	12.8267	0	4	0
596	1	52	1	1	1	0	0	231.78	9825.6	163.76	0	4	0
597	0	61	1	5	1	1	0	9.41	808.2	13.47	0	4	0
598	0	23	0	3	1	1	0	18.98	1341.6	22.36	0	4	0
599	0	23	0	2	1	1	0	18.98	1341.6	22.36	0	4	0
600	0	37	1	1	1	1	0	11.08	1005	16.75	0	4	0
601	0	66	1	2	1	1	0	373.37	19474	324.567	0	4	0
602	1	36	0	1	1	1	0	9.95	850.7	14.1783	0	4	0
603	1	36	0	2	1	1	0	9.95	850.7	14.1783	0	4	0
604	1	47	1	3	1	1	0	27.66	1691.9	28.1983	0	4	0
605	1	47	1	2	1	1	0	27.66	1691.9	28.1983	0	4	0
606	1	69	1	2	1	1	0	30.6	2422.2	40.37	0	4	0
607	1	69	1	1	1	1	0	30.6	2422.2	40.37	0	4	0
608	1	54	1	3	1	1	0	13	1084	18.0667	0	4	0
609	1	39	1	4	1	1	0	8.52	717.9	11.965	0	4	0
610	1	39	1	4	1	1	0	8.52	717.9	11.965	0	4	0
611	1	39	1	4	1	1	0	8.52	717.9	11.965	0	4	0
612	0	60	1	1	1	1	0	7.56	619.4	10.3233	0	4	0
613	0	60	1	2	1	1	0	7.56	619.4	10.3233	0	4	0
614	0	70	1	1	1	1	0	34.91	2003.8	33.3967	0	4	0
615	1	71	0	2	1	1	0	11.97	998.4	16.64	0	4	0
616	1	71	0	4	1	1	0	11.97	998.4	16.64	0	4	0
617	0	51	1	7	1	1	0	12.69	1089.3	18.155	0	4	0
618	1	62	1	1	1	1	0	61.22	3202.8	53.38	0	4	0
619	1	62	1	2	1	1	0	61.22	3202.8	53.38	0	4	0
620	1	45	1	3	1	1	0	124.35	5806.9	96.7817	0	4	0
621	1	45	1	2	1	1	0	124.35	5806.9	96.7817	0	4	0
622	0	41	1	4	1	1	0	89.24	4485.5	74.7583	0	4	0
623	0	41	1	4	1	1	0	89.24	4485.5	74.7583	0	4	0
624	0	41	1	2	1	1	0	89.24	4485.5	74.7583	0	4	0
625	0	41	1	4	1	1	0	89.24	4485.5	74.7583	0	4	0
626	0	34	0	2	1	1	0	25.21	1668.1	27.8017	0	4	0
627	0	70	1	4	1	1	0	47.88	2498.9	41.6483	0	4	0
628	0	70	1	4	1	1	0	47.88	2498.9	41.6483	0	4	0
629	0	34	0	3	1	1	0	25.21	1668.1	27.8017	0	4	0
630	0	70	1	2	1	1	0	47.88	2498.9	41.6483	0	4	0
631	1	75	0	2	1	1	0	8.83	735.7	12.2617	0	4	0
632	1	75	0	3	1	1	0	8.83	735.7	12.2617	0	4	0
633	1	39	1	3	1	1	0	80.1	4012.3	66.8717	0	4	0
634	1	39	1	2	1	1	0	80.1	4012.3	66.8717	0	4	0
635	0	80	1	2	1	1	0	23.37	1554.4	25.9067	0	4	0
636	0	80	1	4	1	1	0	23.37	1554.4	25.9067	0	4	0
637	0	80	1	4	1	1	0	23.37	1554.4	25.9067	1	4	0
638	1	78	0	1	1	1	0	13.77	1210.8	20.18	0	4	0
639	1	78	0	2	1	1	0	13.77	1210.8	20.18	0	4	0
640	1	56	1	3	1	1	0	5.89	548.6	9.14333	0	4	0
641	1	41	1	3	1	1	0	8.83	840.8	14.0133	0	4	0
642	1	71	1	1	1	1	0	48.32	2928.1	48.8017	0	4	0
643	1	71	1	2	1	1	0	48.32	2928.1	48.8017	0	4	0
644	1	34	1	5	1	1	0	12.91	1062.1	17.7017	0	4	0
645	0	53	1	2	1	1	0	7.25	624.6	10.41	0	4	0
646	0	53	1	2	1	1	0	7.25	624.6	10.41	0	4	0
647	0	53	1	2	1	1	0	7.25	624.6	10.41	0	4	0
648	0	62	1	2	1	1	0	55.43	2870.3	47.8383	0	4	0
649	0	62	1	1	1	1	0	55.43	2870.3	47.8383	0	4	0
650	0	62	1	2	1	1	0	55.43	2870.3	47.8383	0	4	0
651	0	48	1	4	1	1	0	30.24	2244.6	37.41	0	4	0
652	0	48	1	4	1	1	0	30.24	2244.6	37.41	0	4	0
653	0	48	1	2	1	1	0	30.24	2244.6	37.41	0	4	0
654	0	48	1	4	1	1	0	30.24	2244.6	37.41	0	4	0
655	1	38	1	1	1	1	0	83.99	4168.9	69.4817	0	4	0
656	1	40	0	2	1	1	0	8.65	1018.9	16.9817	0	4	0
657	1	40	0	3	1	1	0	8.65	1018.9	16.9817	0	4	0
658	1	36	1	3	1	1	0	258.4	12373.9	206.232	0	4	0
659	1	36	1	2	1	1	0	258.4	12373.9	206.232	0	4	0
660	0	54	1	7	1	1	0	8.97	825.5	13.7583	0	4	0
661	0	72	1	3	1	1	0	9.95	850.7	14.1783	0	4	0
662	1	46	1	3	1	1	0	34.66	2236.6	37.2767	0	4	0
663	1	46	1	2	1	1	0	34.66	2236.6	37.2767	0	4	0
664	0	57	1	3	1	1	0	137.12	6421.9	107.032	0	4	0
665	0	40	1	3	1	1	0	9.19	821.7	13.695	0	4	0
666	0	40	1	2	1	1	0	9.19	821.7	13.695	0	4	0
667	0	60	1	5	1	1	0	21.6	1464.4	24.4067	13	4	0
668	0	25	0	7	1	0	0	19.52	1366.7	22.7783	1	4	0
669	0	52	1	2	1	1	0	65.27	3589.4	59.8233	0	4	0
670	0	52	1	1	1	1	0	65.27	3589.4	59.8233	0	4	0
671	0	37	0	3	1	1	0	22.26	1833.7	30.5617	0	4	0
672	0	37	0	2	1	1	0	22.26	1833.7	30.5617	0	4	0
673	0	73	1	4	1	1	0	12.34	1026.7	17.1117	0	4	0
674	1	47	0	2	1	1	0	373.37	19474	324.567	0	4	0
675	1	47	0	3	1	1	0	373.37	19474	324.567	0	4	0
676	0	73	1	4	1	1	0	12.34	1026.7	17.1117	0	4	0
677	1	48	1	2	1	1	0	18.11	1504.5	25.075	0	4	1
678	0	34	1	1	1	0	0	8.25	723.1	12.0517	8	4	0
679	1	59	1	2	1	1	0	5.89	548.6	9.14333	0	4	0
680	1	59	1	4	1	1	0	5.89	548.6	9.14333	0	4	0
681	1	24	1	3	1	1	0	9.41	816.7	13.6117	84	4	0
682	0	57	1	3	1	1	0	42.97	2903.5	48.3917	0	4	0
683	1	59	1	4	1	1	0	5.89	548.6	9.14333	0	4	0
684	0	46	1	4	1	0	0	26.48	2011.6	33.5267	0	4	0
685	0	46	1	4	1	0	0	26.48	2011.6	33.5267	0	4	0
686	0	46	1	2	1	0	0	26.48	2011.6	33.5267	0	4	0
687	0	46	1	2	1	0	0	26.48	2011.6	33.5267	0	4	0
688	1	28	0	1	1	1	0	44.4	2459.5	40.9917	0	4	0
689	1	83	0	4	1	1	0	371.97	16685.3	278.088	0	4	0
690	1	83	0	4	1	1	0	371.97	16685.3	278.088	0	4	0
691	1	83	0	4	1	1	0	371.97	16685.3	278.088	0	4	0
692	1	83	0	4	1	1	0	371.97	16685.3	278.088	0	4	0
693	1	83	0	4	1	1	0	371.97	16685.3	278.088	0	4	0
694	0	48	1	1	1	1	0	8.52	717.9	11.965	0	4	0
695	0	48	1	2	1	1	0	8.52	717.9	11.965	0	4	0
696	1	49	1	6	1	1	1	9.16	816.6	13.61	0	4	0
697	0	40	0	3	1	1	0	53.2	2903	48.3833	0	4	0
698	1	38	0	3	1	1	0	145.07	6439.7	107.328	0	4	0
699	1	38	0	2	1	1	0	145.07	6439.7	107.328	0	4	0
700	0	56	1	2	1	1	0	9.44	849.2	14.1533	0	4	0
701	0	56	1	3	1	1	0	9.44	849.2	14.1533	0	4	0
702	1	36	1	7	1	1	0	19.85	1356	22.6	0	4	0
703	0	59	1	1	1	1	0	34.66	2236.6	37.2767	0	4	0
704	0	59	1	2	1	1	0	34.66	2236.6	37.2767	0	4	0
705	1	53	1	3	1	1	0	8.52	717.9	11.965	0	4	0
706	1	53	1	2	1	1	0	8.52	717.9	11.965	0	4	0
707	0	63	1	4	1	1	0	51.07	2754.3	45.905	0	4	0
708	0	63	1	4	1	1	0	51.07	2754.3	45.905	0	4	0
709	0	63	1	2	1	1	0	51.07	2754.3	45.905	0	4	0
710	0	63	1	4	1	1	0	51.07	2754.3	45.905	0	4	0
711	1	61	1	4	1	1	0	45.07	2541	42.35	0	4	0
712	1	61	1	4	1	1	0	45.07	2541	42.35	0	4	0
713	0	50	1	1	1	1	0	16.5	1287.8	21.4633	0	4	0
714	0	52	1	4	1	1	0	12.62	1177.6	19.6267	0	4	0
715	0	52	1	4	1	1	0	12.62	1177.6	19.6267	0	4	0
716	0	52	1	4	1	1	0	12.62	1177.6	19.6267	0	4	0
717	0	40	1	4	1	1	0	25.73	2124.4	35.4067	0	4	0
718	0	40	1	4	1	1	0	25.73	2124.4	35.4067	0	4	0
719	0	40	1	4	1	1	0	25.73	2124.4	35.4067	0	4	0
720	0	42	1	1	1	1	0	18.77	1541.2	25.6867	0	4	0
721	1	54	1	2	1	1	0	22.04	1418.3	23.6383	0	4	0
722	1	54	1	1	1	1	0	22.04	1418.3	23.6383	0	4	0
723	0	52	1	2	1	1	0	65.27	3589.4	59.8233	0	4	0
724	0	52	1	2	1	1	0	65.27	3589.4	59.8233	0	4	0
725	0	52	1	1	1	1	0	65.27	3589.4	59.8233	0	4	0
726	0	52	1	2	1	1	0	65.27	3589.4	59.8233	0	4	0
727	1	62	1	6	1	1	1	23.47	1828.8	30.48	0	4	0
728	1	62	1	2	1	1	0	23.47	1828.8	30.48	0	4	0
729	0	47	1	4	1	0	0	24.88	1875	31.25	0	4	0
730	1	67	1	4	1	1	0	23.37	1554.4	25.9067	0	4	0
731	1	67	1	4	1	1	0	23.37	1554.4	25.9067	0	4	0
732	1	67	1	4	1	1	0	23.37	1554.4	25.9067	0	4	0
733	1	48	1	2	1	1	0	22.26	1833.7	30.5617	0	4	0
734	1	48	1	2	1	1	0	22.26	1833.7	30.5617	0	4	0
735	1	48	1	2	1	1	0	22.26	1833.7	30.5617	0	4	0
736	1	48	1	1	1	1	0	22.26	1833.7	30.5617	0	4	0
737	1	36	1	3	1	1	0	10.34	893.7	14.895	0	4	0
738	1	36	1	2	1	1	0	10.34	893.7	14.895	0	4	0
739	1	59	1	2	1	1	0	5.89	548.6	9.14333	0	4	0
740	0	30	0	2	1	1	0	82.09	4506.4	75.1067	0	4	0
741	0	30	0	2	1	1	0	82.09	4506.4	75.1067	0	4	0
742	0	30	0	4	1	1	0	82.09	4506.4	75.1067	0	4	0
743	0	30	0	4	1	1	0	82.09	4506.4	75.1067	0	4	0
744	0	42	1	3	1	1	0	18.17	1465.8	24.43	0	4	0
745	0	42	1	2	1	1	0	18.17	1465.8	24.43	0	4	0
746	0	36	1	2	1	1	0	9.16	816.6	13.61	0	4	0
747	0	36	1	3	1	1	0	9.16	816.6	13.61	0	4	0
748	1	18	0	3	1	1	0	9.56	826.7	13.7783	0	4	0
749	1	18	0	2	1	1	0	9.56	826.7	13.7783	0	4	0
750	1	92	0	4	1	1	0	89.99	4546.4	75.7733	0	4	0
751	1	92	0	4	1	1	0	89.99	4546.4	75.7733	0	4	0
752	1	92	0	2	1	1	0	89.99	4546.4	75.7733	0	4	0
753	1	92	0	4	1	1	0	89.99	4546.4	75.7733	0	4	0
754	1	69	1	4	1	1	0	12.64	1114.3	18.5717	0	4	0
755	1	69	1	4	1	1	0	12.64	1114.3	18.5717	0	4	0
756	1	69	1	2	1	1	0	12.64	1114.3	18.5717	0	4	0
757	1	47	1	3	1	1	0	9.95	850.7	14.1783	0	4	0
758	1	47	1	2	1	1	0	9.95	850.7	14.1783	0	4	0
759	0	61	0	1	1	1	0	37.47	2649.7	44.1617	0	4	0
760	0	61	0	2	1	1	0	37.47	2649.7	44.1617	0	4	0
761	1	37	0	3	1	1	0	1510.52	61493.3	1024.89	0	4	0
762	1	38	1	1	1	0	0	19.26	1577.7	26.295	84	4	0
763	1	35	1	3	1	1	0	78.25	4004.1	66.735	0	4	0
764	0	46	1	1	1	1	0	7.56	619.4	10.3233	0	4	0
765	1	22	0	7	1	1	0	19.85	1356	22.6	0	4	0
766	0	63	1	5	1	1	0	51.34	3009.2	50.1533	0	4	0
767	0	70	0	2	1	1	0	22.59	1708.2	28.47	0	4	0
768	0	70	0	3	1	1	0	22.59	1708.2	28.47	0	4	0
769	1	52	1	3	1	1	0	51.07	2754.3	45.905	0	4	0
770	1	52	1	2	1	1	0	51.07	2754.3	45.905	0	4	0
771	1	65	1	4	1	1	0	51.66	4229	70.4833	9	4	0
772	1	65	1	4	1	1	0	51.66	4229	70.4833	0	4	0
773	1	65	1	2	1	1	0	51.66	4229	70.4833	0	4	0
774	1	65	1	2	1	1	0	51.66	4229	70.4833	0	4	0
775	0	70	1	5	1	1	0	54.46	2991.7	49.8617	0	4	0
776	0	32	0	3	1	1	0	50.41	2988.9	49.815	0	4	0
777	1	32	1	3	1	1	0	47.54	2891.8	48.1967	0	4	0
778	1	48	1	3	1	1	0	7.44	629.1	10.485	0	4	0
779	1	79	0	2	1	1	0	8.98	749.4	12.49	0	4	0
780	1	79	0	1	1	1	0	8.98	749.4	12.49	0	4	0
781	1	28	1	4	1	1	0	18.17	1465.8	24.43	0	4	0
782	1	28	1	4	1	1	0	18.17	1465.8	24.43	0	4	0
783	1	28	1	2	1	1	0	18.17	1465.8	24.43	0	4	0
784	0	63	1	5	1	1	0	268.61	12499.3	208.322	0	4	0
785	0	51	1	3	1	1	0	5.89	548.6	9.14333	0	4	0
786	0	51	1	2	1	1	0	5.89	548.6	9.14333	0	4	0
787	0	71	1	6	1	1	1	24.88	1875	31.25	0	4	0
788	0	71	1	2	1	1	0	24.88	1875	31.25	0	4	0
789	0	71	1	2	1	1	0	24.88	1875	31.25	0	4	0
790	1	48	1	3	1	1	0	18.46	1477.9	24.6317	0	4	0
791	1	48	1	2	1	1	0	18.46	1477.9	24.6317	0	4	0
792	0	63	1	4	1	1	0	51.34	3009.2	50.1533	0	4	0
793	0	63	1	4	1	1	0	51.34	3009.2	50.1533	0	4	0
794	0	63	1	2	1	1	0	51.34	3009.2	50.1533	0	4	0
795	0	63	1	5	1	1	0	51.34	3009.2	50.1533	0	4	0
796	0	63	1	5	1	1	1	51.34	3009.2	50.1533	0	4	0
797	1	27	1	3	1	1	0	89.21	4512.2	75.2033	0	4	0
798	1	54	1	3	1	1	0	24.44	1916	31.9333	0	4	0
799	1	54	1	2	1	1	0	24.44	1916	31.9333	0	4	0
800	0	83	1	4	1	0	0	9.41	816.7	13.6117	0	4	0
801	1	71	0	4	1	0	0	18.46	1477.9	24.6317	0	4	0
802	1	53	1	2	1	1	0	67.01	3320.8	55.3467	0	4	0
803	1	53	1	3	1	1	0	67.01	3320.8	55.3467	0	4	0
804	0	36	0	3	1	1	0	57.65	3995.6	66.5933	0	4	0
805	1	66	1	1	1	1	0	59.46	3229	53.8167	0	4	0
806	1	66	1	2	1	1	0	59.46	3229	53.8167	0	4	0
807	0	60	1	4	1	1	0	105.5	5502	91.7	0	4	0
808	0	60	1	4	1	1	0	105.5	5502	91.7	0	4	0
809	0	60	1	2	1	1	0	105.5	5502	91.7	0	4	0
810	1	64	1	3	1	1	0	7.37	715.1	11.9183	0	4	0
811	1	30	0	7	1	1	0	5.23	547.9	9.13167	0	4	0
812	1	75	1	2	1	1	0	21.46	1651.5	27.525	0	4	0
813	1	75	1	2	1	1	0	21.46	1651.5	27.525	0	4	0
814	1	75	1	2	1	1	0	21.46	1651.5	27.525	0	4	0
815	0	73	1	4	1	0	0	51.66	4229	70.4833	0	4	0
816	0	78	1	4	1	0	0	92.48	4340.3	72.3383	0	4	0
817	0	70	1	4	1	0	0	21.46	1651.5	27.525	0	4	0
818	1	62	0	2	1	1	0	9.16	816.6	13.61	0	4	0
819	0	48	1	5	1	1	0	51.34	3009.2	50.1533	0	4	0
820	0	48	1	5	1	1	1	51.34	3009.2	50.1533	0	4	0
821	0	64	0	2	1	1	0	13.39	1340.9	22.3483	0	4	0
822	0	64	0	1	1	1	0	13.39	1340.9	22.3483	0	4	0
823	1	34	1	3	1	1	0	16.5	1287.8	21.4633	0	4	0
824	1	52	1	3	1	1	0	42.97	2903.5	48.3917	0	4	0
825	1	85	0	3	1	1	0	5.23	547.9	9.13167	0	4	0
826	1	34	1	1	1	1	0	16.5	1287.8	21.4633	0	4	0
827	0	45	1	4	1	1	0	19.85	1356	22.6	42	4	0
828	0	45	1	4	1	1	0	19.85	1356	22.6	0	4	0
829	0	45	1	4	1	1	0	19.85	1356	22.6	0	4	0
830	0	58	1	7	1	1	0	181.07	9249.6	154.16	0	4	0
831	0	70	1	4	1	1	0	514.4	22859.1	380.985	1	4	0
832	0	70	1	2	1	1	0	514.4	22859.1	380.985	0	4	0
833	0	70	1	2	1	1	0	514.4	22859.1	380.985	0	4	0
834	1	40	0	5	1	1	0	18.46	1477.9	24.6317	0	4	0
835	0	58	1	5	1	1	0	5.23	547.9	9.13167	0	4	0
836	0	48	1	1	1	1	0	19.26	1577.7	26.295	0	4	0
837	0	48	1	2	1	1	0	19.26	1577.7	26.295	0	4	0
838	0	48	1	2	1	1	0	19.26	1577.7	26.295	0	4	0
839	0	26	1	3	1	1	0	59.46	3229	53.8167	0	4	0
840	1	28	1	2	1	1	0	18.17	1465.8	24.43	0	4	0
841	0	34	1	1	1	0	0	8.25	723.1	12.0517	3	4	1
842	0	75	1	2	1	1	0	10.78	917.8	15.2967	0	4	0
843	0	75	1	1	1	1	0	10.78	917.8	15.2967	0	4	0
844	0	72	1	4	1	1	0	30.6	2422.2	40.37	0	4	0
845	0	72	1	4	1	1	0	30.6	2422.2	40.37	0	4	0
846	0	72	1	4	1	1	0	30.6	2422.2	40.37	0	4	0
847	0	50	1	1	1	1	0	89.99	4546.4	75.7733	0	4	0
848	0	62	1	6	1	1	1	187.07	8745	145.75	0	4	0
849	1	80	0	4	1	1	0	42.97	2903.5	48.3917	0	4	0
850	1	80	0	2	1	1	0	42.97	2903.5	48.3917	0	4	0
851	1	80	0	4	1	1	0	42.97	2903.5	48.3917	0	4	0
852	1	80	0	4	1	1	0	42.97	2903.5	48.3917	0	4	0
853	1	81	0	4	1	0	0	197.52	10469.9	174.498	0	4	0
854	1	81	0	4	1	1	0	197.52	10469.9	174.498	0	4	0
855	1	41	1	3	1	1	0	54.76	2910.6	48.51	0	4	0
856	0	33	0	3	1	1	0	77.49	3988.9	66.4817	0	4	0
857	0	33	0	2	1	1	0	77.49	3988.9	66.4817	0	4	0
858	1	60	1	2	1	1	0	13	1084	18.0667	0	4	0
859	1	60	1	3	1	1	0	13	1084	18.0667	0	4	0
860	1	80	1	2	1	1	0	49.86	2537.6	42.2933	0	4	0
861	1	80	1	1	1	1	0	49.86	2537.6	42.2933	0	4	0
862	0	30	0	4	1	1	0	82.09	4506.4	75.1067	0	4	0
863	0	30	0	4	1	1	0	82.09	4506.4	75.1067	0	4	0
864	0	45	1	5	1	1	0	19.38	1590.2	26.5033	0	4	0
865	0	77	1	2	1	1	0	51.66	4229	70.4833	0	4	0
866	1	50	1	1	1	1	0	8.52	717.9	11.965	0	4	0
867	1	50	1	2	1	1	0	8.52	717.9	11.965	0	4	0
868	0	60	1	2	1	1	0	105.5	5502	91.7	0	4	0
869	0	30	1	3	1	1	0	116.62	5166.1	86.1017	0	4	0
870	0	30	1	2	1	1	0	116.62	5166.1	86.1017	0	4	0
871	1	46	1	3	1	1	0	67.01	3320.8	55.3467	0	4	0
872	1	46	1	2	1	1	0	67.01	3320.8	55.3467	0	4	0
873	1	28	1	1	1	1	0	899.97	39455.7	657.595	0	4	0
874	0	70	0	2	1	0	0	17.76	1486.9	24.7817	0	4	0
875	0	48	1	2	1	1	0	51.34	3009.2	50.1533	0	4	0
876	0	48	1	4	1	1	0	51.34	3009.2	50.1533	0	4	0
877	0	48	1	4	1	1	0	51.34	3009.2	50.1533	5	4	1
878	1	49	1	4	1	1	0	18.17	1465.8	24.43	0	4	0
879	1	49	1	2	1	1	0	18.17	1465.8	24.43	0	4	0
880	1	49	1	4	1	1	0	18.17	1465.8	24.43	0	4	0
881	1	49	1	4	1	1	0	18.17	1465.8	24.43	0	4	0
882	0	74	1	1	1	1	0	10.19	911.6	15.1933	0	4	0
883	0	74	1	2	1	1	0	10.19	911.6	15.1933	0	4	0
884	1	30	1	3	1	1	0	51.66	4229	70.4833	0	4	0
885	0	53	1	2	1	1	0	31.09	2571.2	42.8533	0	4	0
886	0	53	1	3	1	1	0	31.09	2571.2	42.8533	0	4	0
887	0	51	1	1	1	0	0	42.97	2903.5	48.3917	5	4	1
888	0	53	1	5	1	1	0	427.97	17947.4	299.123	0	4	0
889	0	70	1	1	1	1	0	74.39	3765.5	62.7583	0	4	0
890	0	70	1	2	1	1	0	74.39	3765.5	62.7583	0	4	0
891	0	69	1	1	1	0	0	10.19	911.6	15.1933	0	4	0
892	1	26	0	3	1	1	0	8.89	849.6	14.16	0	4	0
893	1	26	0	2	1	1	0	8.89	849.6	14.16	0	4	0
894	1	64	1	3	1	1	0	12.34	1026.7	17.1117	0	4	0
895	1	37	1	2	1	1	0	51.66	4229	70.4833	0	4	0
896	1	37	1	3	1	1	0	51.66	4229	70.4833	0	4	0
897	1	77	0	4	1	1	0	42.97	2903.5	48.3917	0	4	0
898	1	77	0	4	1	1	0	42.97	2903.5	48.3917	0	4	0
899	1	77	0	4	1	1	0	42.97	2903.5	48.3917	0	4	0
900	1	48	0	2	1	1	0	788.23	33197.5	553.292	0	4	0
901	1	48	0	2	1	1	0	788.23	33197.5	553.292	0	4	0
902	1	48	0	2	1	1	0	788.23	33197.5	553.292	0	4	0
903	1	59	0	2	1	1	0	146.22	6389.7	106.495	0	4	0
904	1	59	0	2	1	1	0	146.22	6389.7	106.495	0	4	0
905	1	59	0	1	1	1	0	146.22	6389.7	106.495	0	4	0
906	1	59	0	2	1	1	0	146.22	6389.7	106.495	0	4	0
907	0	47	1	4	1	1	0	681.53	27465.6	457.76	0	4	0
908	0	47	1	4	1	1	0	681.53	27465.6	457.76	0	4	0
909	0	47	1	2	1	1	0	681.53	27465.6	457.76	0	4	0
910	1	39	1	3	1	1	0	19.52	1366.7	22.7783	0	4	0
911	0	69	1	4	1	1	0	51.66	4229	70.4833	0	4	0
912	0	69	1	4	1	1	0	51.66	4229	70.4833	0	4	0
913	0	69	1	2	1	1	0	51.66	4229	70.4833	0	4	0
914	0	69	1	4	1	1	0	51.66	4229	70.4833	0	4	0
915	0	71	1	4	1	1	0	97.71	5054.4	84.24	0	4	0
916	0	71	1	4	1	1	0	97.71	5054.4	84.24	0	4	0
917	0	71	1	4	1	1	0	97.71	5054.4	84.24	0	4	0
918	0	50	1	2	1	1	0	24.88	1875	31.25	0	4	0
919	0	50	1	1	1	1	0	24.88	1875	31.25	0	4	0
920	0	47	1	4	1	0	0	23.94	1825.4	30.4233	0	4	0
921	0	47	1	4	1	0	0	23.94	1825.4	30.4233	1	4	1
922	0	65	1	2	1	1	0	84.34	4310.5	71.8417	0	4	0
923	0	65	1	4	1	1	0	84.34	4310.5	71.8417	0	4	0
924	0	65	1	4	1	1	0	84.34	4310.5	71.8417	0	4	0
925	0	65	1	4	1	1	0	84.34	4310.5	71.8417	0	4	0
926	0	74	1	4	1	0	0	5.23	547.9	9.13167	0	4	0
927	1	75	1	4	1	0	0	17.72	1212.2	20.2033	0	4	0
928	0	63	1	5	1	1	0	51.34	3009.2	50.1533	0	4	0
929	0	53	1	2	1	1	0	8.97	825.5	13.7583	0	4	0
930	0	53	1	1	1	1	0	8.97	825.5	13.7583	0	4	0
931	0	63	1	5	1	1	1	51.34	3009.2	50.1533	0	4	0
932	0	40	1	7	1	1	0	1547.82	61931.9	1032.2	0	4	0
933	0	57	1	2	1	1	0	55.81	2978.2	49.6367	0	4	0
934	0	57	1	1	1	1	0	55.81	2978.2	49.6367	0	4	0
935	1	42	1	3	1	1	0	62.31	3198.2	53.3033	0	4	0
936	1	56	1	2	1	1	0	57.09	3027.4	50.4567	0	4	0
937	0	39	1	4	1	1	0	20.04	1656.1	27.6017	0	4	0
938	0	39	1	4	1	1	0	20.04	1656.1	27.6017	0	4	0
939	1	31	1	3	1	1	0	17.25	1197.4	19.9567	0	4	0
940	1	31	1	2	1	1	0	17.25	1197.4	19.9567	0	4	0
941	1	37	1	3	1	1	0	51.66	4229	70.4833	0	4	0
942	1	25	0	4	1	0	0	13.39	1340.9	22.3483	4	4	0
943	1	37	1	2	1	0	0	18.46	1477.9	24.6317	0	4	0
944	1	37	1	2	1	0	0	18.46	1477.9	24.6317	0	4	0
945	0	42	0	4	1	1	0	55.81	2978.2	49.6367	0	4	0
946	0	42	0	4	1	1	0	55.81	2978.2	49.6367	0	4	0
947	0	42	0	2	1	1	0	55.81	2978.2	49.6367	0	4	0
948	0	63	1	1	1	1	0	9.16	816.6	13.61	0	4	0
949	0	46	1	3	1	1	0	57.48	3073.2	51.22	0	4	0
950	0	46	1	2	1	1	0	57.48	3073.2	51.22	0	4	0
951	0	46	1	4	1	1	0	647.46	26192.9	436.548	0	4	0
952	0	46	1	4	1	1	0	647.46	26192.9	436.548	0	4	0
953	0	46	1	4	1	1	0	647.46	26192.9	436.548	0	4	0
954	0	68	0	4	1	1	0	848.61	33378.4	556.307	0	4	0
955	0	68	0	2	1	1	0	848.61	33378.4	556.307	0	4	0
956	0	68	0	4	1	1	0	848.61	33378.4	556.307	0	4	0
957	0	68	0	4	1	1	0	848.61	33378.4	556.307	0	4	0
958	0	63	1	4	1	1	0	30.01	2208.5	36.8083	1	4	0
959	0	63	1	4	1	1	0	30.01	2208.5	36.8083	0	4	0
960	0	63	1	4	1	1	0	30.01	2208.5	36.8083	0	4	0
961	0	63	1	2	1	1	0	30.01	2208.5	36.8083	0	4	0
962	1	54	1	3	1	1	0	52.75	3779.3	62.9883	0	4	0
963	1	54	1	2	1	1	0	52.75	3779.3	62.9883	0	4	0
964	0	63	1	7	1	1	0	74.15	3726.8	62.1133	0	4	0
965	0	39	1	2	1	1	0	5.23	547.9	9.13167	0	4	0
966	0	39	1	3	1	1	0	5.23	547.9	9.13167	0	4	0
967	0	70	1	4	1	1	0	514.4	22859.1	380.985	0	4	0
968	1	57	1	5	1	1	0	23.14	1553	25.8833	0	4	0
969	0	51	1	1	1	1	0	51.26	2760.9	46.015	0	4	0
970	0	39	1	7	1	1	0	20.04	1656.1	27.6017	0	4	0
971	1	66	1	4	1	1	0	104.66	4931.1	82.185	0	4	0
972	1	66	1	4	1	1	0	104.66	4931.1	82.185	0	4	0
973	1	66	1	4	1	1	0	104.66	4931.1	82.185	0	4	0
974	1	59	1	3	1	1	0	7.37	715.1	11.9183	0	4	0
975	1	80	1	5	1	1	0	49.86	2537.6	42.2933	0	4	0
976	1	59	1	5	1	1	0	42.97	2903.5	48.3917	0	4	0
977	1	76	1	4	1	1	0	52.27	2770	46.1667	0	4	0
978	1	76	1	4	1	1	0	52.27	2770	46.1667	0	4	0
979	1	76	1	2	1	1	0	52.27	2770	46.1667	0	4	0
980	1	76	1	4	1	1	0	52.27	2770	46.1667	0	4	0
981	1	64	1	3	1	1	0	146.66	6428.6	107.143	0	4	0
982	0	83	1	4	1	0	0	9.41	816.7	13.6117	0	4	0
983	0	65	1	4	1	1	0	11.37	997	16.6167	0	4	0
984	0	65	1	4	1	1	0	11.37	997	16.6167	0	4	0
985	0	65	1	4	1	1	0	11.37	997	16.6167	0	4	0
986	0	65	1	2	1	1	0	11.37	997	16.6167	0	4	0
987	0	79	1	4	1	1	0	26.43	1944.1	32.4017	0	4	0
988	0	79	1	4	1	1	0	26.43	1944.1	32.4017	3	4	0
989	0	79	1	2	1	1	0	26.43	1944.1	32.4017	3	4	0
990	0	79	1	4	1	1	0	26.43	1944.1	32.4017	3	4	0
991	0	50	1	2	1	1	0	57.48	3073.2	51.22	0	4	0
992	0	50	1	3	1	1	0	57.48	3073.2	51.22	0	4	0
993	1	39	1	2	1	1	0	11.62	991.1	16.5183	0	4	0
994	1	39	1	3	1	1	0	11.62	991.1	16.5183	0	4	0
995	0	58	1	4	1	1	0	40.6	3389.2	56.4867	0	4	0
996	0	58	1	4	1	1	0	40.6	3389.2	56.4867	0	4	0
997	0	58	1	2	1	1	0	40.6	3389.2	56.4867	0	4	0
998	0	58	1	4	1	1	0	40.6	3389.2	56.4867	0	4	0
999	1	58	1	7	1	1	0	229.44	9697.8	161.63	0	4	0
1000	0	50	1	4	1	1	0	16.08	1370.4	22.84	0	4	0
1001	0	50	1	4	1	1	0	16.08	1370.4	22.84	0	4	0
1002	0	50	1	2	1	1	0	16.08	1370.4	22.84	0	4	0
1003	0	50	1	4	1	1	0	16.08	1370.4	22.84	0	4	0
1004	0	50	1	2	1	1	0	16.08	1370.4	22.84	0	4	0
1005	0	39	1	2	1	1	0	20.04	1656.1	27.6017	0	4	0
1006	1	53	0	2	1	1	0	8.63	759.5	12.6583	1	4	0
1007	1	53	0	1	1	1	0	8.63	759.5	12.6583	1	4	0
1008	0	74	1	4	1	0	0	9.19	821.7	13.695	0	4	0
1009	0	74	1	2	1	0	0	9.19	821.7	13.695	0	4	0
1010	0	74	1	4	1	0	0	9.19	821.7	13.695	0	4	0
1011	0	41	0	2	1	1	0	8.83	735.7	12.2617	0	4	0
1012	0	41	0	1	1	1	0	8.83	735.7	12.2617	0	4	0
1013	1	56	0	1	1	1	0	306.84	13072.8	217.88	0	4	0
1014	1	53	0	7	1	1	0	8.63	759.5	12.6583	0	4	0
1015	0	60	1	1	1	1	0	23.37	1666.6	27.7767	0	4	0
1016	0	60	1	2	1	1	0	23.37	1666.6	27.7767	0	4	0
1017	1	59	1	1	1	1	0	22.04	1418.3	23.6383	0	4	0
1018	1	34	0	2	1	1	0	494.94	22618.2	376.97	0	4	0
1019	0	55	1	2	1	1	0	18.98	1341.6	22.36	0	4	0
1020	0	55	1	1	1	1	0	18.98	1341.6	22.36	0	4	0
1021	0	46	1	2	1	1	0	24.88	1875	31.25	0	4	0
1022	0	46	1	3	1	1	0	24.88	1875	31.25	0	4	0
1023	0	76	1	2	1	1	0	59.65	3143.8	52.3967	0	4	0
1024	0	76	1	1	1	1	0	59.65	3143.8	52.3967	0	4	0
1025	1	58	1	2	1	1	0	12.64	1114.3	18.5717	0	4	0
1026	1	58	1	3	1	1	0	12.64	1114.3	18.5717	0	4	0
1027	1	62	1	3	1	1	0	7.56	619.4	10.3233	0	4	0
1028	1	52	1	1	1	1	0	27.97	2041.9	34.0317	0	4	0
1029	1	52	1	2	1	1	0	27.97	2041.9	34.0317	0	4	0
1030	0	66	1	1	1	1	0	58.42	3086.6	51.4433	0	4	0
1031	1	50	1	2	1	1	0	42.69	2425.9	40.4317	0	4	0
1032	1	50	1	1	1	1	0	42.69	2425.9	40.4317	0	4	0
1033	1	39	1	2	1	1	0	10.19	911.6	15.1933	0	4	0
1034	1	39	1	3	1	1	0	10.19	911.6	15.1933	0	4	0
1035	1	63	1	2	1	1	0	21.46	1651.5	27.525	0	4	0
1036	1	63	1	3	1	1	0	21.46	1651.5	27.525	0	4	0
1037	1	55	1	7	1	1	0	16.5	1287.8	21.4633	0	4	0
1038	0	55	1	2	1	1	0	143.97	6263.8	104.397	0	4	0
1039	0	55	1	1	1	1	0	143.97	6263.8	104.397	0	4	0
1040	0	31	0	3	1	1	0	1586.56	72706	1211.77	0	4	0
1041	0	45	1	1	1	1	0	13.14	1070.9	17.8483	0	4	0
1042	0	45	1	2	1	1	0	13.14	1070.9	17.8483	0	4	0
1043	1	57	1	2	1	1	0	82.34	4010.6	66.8433	0	4	0
1044	1	57	1	2	1	1	0	82.34	4010.6	66.8433	0	4	0
1045	1	57	1	2	1	1	0	82.34	4010.6	66.8433	0	4	0
1046	0	70	1	2	1	1	0	138.2	7140.9	119.015	0	4	0
1047	0	70	1	1	1	1	0	138.2	7140.9	119.015	0	4	0
1048	0	70	1	2	1	1	0	138.2	7140.9	119.015	0	4	0
1049	1	44	1	1	1	1	0	10.19	911.6	15.1933	0	4	0
1050	1	44	1	2	1	1	0	10.19	911.6	15.1933	0	4	0
1051	1	44	1	2	1	1	0	10.19	911.6	15.1933	0	4	0
1052	0	66	1	1	1	1	0	100.34	4751.6	79.1933	0	4	0
1053	0	66	1	2	1	1	0	100.34	4751.6	79.1933	0	4	0
1054	0	32	0	3	1	1	0	61.25	3306.4	55.1067	0	4	0
1055	0	52	1	2	1	1	0	21.6	1464.4	24.4067	0	4	0
1056	0	52	1	1	1	1	0	21.6	1464.4	24.4067	0	4	0
1057	1	47	1	2	1	1	0	56.13	2779.9	46.3317	0	4	0
1058	1	47	1	1	1	1	0	56.13	2779.9	46.3317	0	4	0
1059	0	74	1	4	1	1	0	43.05	2459.3	40.9883	0	4	0
1060	0	74	1	4	1	1	0	43.05	2459.3	40.9883	0	4	0
1061	0	42	0	4	1	1	0	55.81	2978.2	49.6367	0	4	0
1062	0	42	0	2	1	1	0	55.81	2978.2	49.6367	0	4	0
1063	0	42	0	2	1	1	0	55.81	2978.2	49.6367	0	4	0
1064	0	42	0	4	1	1	0	55.81	2978.2	49.6367	0	4	0
1065	1	66	1	4	1	1	0	9.47	909.2	15.1533	0	4	0
1066	1	66	1	4	1	1	0	9.47	909.2	15.1533	0	4	0
1067	1	66	1	2	1	1	0	9.47	909.2	15.1533	0	4	0
1068	1	66	1	4	1	1	0	9.47	909.2	15.1533	0	4	0
1069	0	61	1	1	1	1	0	16.08	1370.4	22.84	0	4	0
1070	0	61	1	2	1	1	0	23.37	1554.4	25.9067	0	4	0
1071	0	61	1	1	1	1	0	23.37	1554.4	25.9067	0	4	0
1072	1	64	1	5	1	1	0	564.56	23681.8	394.697	0	4	0
1073	1	64	1	5	1	1	1	564.56	23681.8	394.697	4	4	0
1074	1	38	1	2	1	1	0	59.18	3287.8	54.7967	0	4	0
1075	1	38	1	3	1	1	0	59.18	3287.8	54.7967	0	4	0
1076	1	23	0	3	1	1	0	4.84	443.6	7.39333	0	4	0
1077	0	45	1	2	1	1	0	35.61	2138.7	35.645	0	4	0
1078	0	45	1	3	1	1	0	35.61	2138.7	35.645	0	4	0
1079	0	67	1	1	1	1	0	10.08	902.7	15.045	0	4	0
1080	0	67	1	2	1	1	0	10.08	902.7	15.045	0	4	0
1081	0	67	1	2	1	1	0	10.08	902.7	15.045	0	4	0
1082	0	82	0	2	1	1	0	42.97	2903.5	48.3917	0	4	0
1083	0	82	0	1	1	1	0	42.97	2903.5	48.3917	0	4	0
1084	0	54	1	4	1	0	0	7.37	715.1	11.9183	0	4	0
1085	0	54	1	2	1	0	0	7.37	715.1	11.9183	0	4	0
1086	0	54	1	2	1	0	0	7.37	715.1	11.9183	0	4	0
1087	0	69	1	1	1	1	0	10.19	911.6	15.1933	0	4	0
1088	0	55	1	1	1	1	0	223.47	9390.6	156.51	0	4	1
1089	0	55	1	2	1	1	0	223.47	9390.6	156.51	0	4	0
1090	0	55	1	1	1	1	0	223.47	9390.6	156.51	0	4	0
1091	0	74	1	4	1	1	0	43.05	2459.3	40.9883	0	4	0
1092	0	74	1	4	1	1	0	43.05	2459.3	40.9883	0	4	0
1093	0	74	1	4	1	1	0	43.05	2459.3	40.9883	0	4	0
1094	1	32	1	1	1	1	0	21.46	1651.5	27.525	0	4	0
1095	1	32	1	2	1	1	0	21.46	1651.5	27.525	0	4	0
1096	0	71	1	1	1	1	0	47.54	2891.8	48.1967	19	4	0
1097	1	24	1	2	1	1	0	9.41	816.7	13.6117	0	4	0
1098	0	43	1	3	1	1	0	77.32	3886.3	64.7717	0	4	0
1099	0	58	1	1	1	1	0	9.7	857.9	14.2983	0	4	0
1100	0	58	1	2	1	1	0	9.7	857.9	14.2983	0	4	0
1101	0	44	1	2	1	1	0	89.17	4415.4	73.59	0	4	0
1102	0	74	1	4	1	0	0	47.82	2921.3	48.6883	0	4	0
1103	0	56	1	4	1	0	0	22.04	1418.3	23.6383	0	4	0
1104	0	72	1	4	1	0	0	59.29	3099.9	51.665	0	4	1
1105	0	62	1	4	1	1	0	324.19	15552.7	259.212	0	4	0
1106	0	62	1	4	1	1	0	324.19	15552.7	259.212	0	4	0
1107	1	42	0	2	1	1	0	8.52	717.9	11.965	0	4	0
1108	1	42	0	3	1	1	0	8.52	717.9	11.965	0	4	0
1109	0	87	0	2	1	1	0	9.16	816.6	13.61	0	4	0
1110	1	75	1	4	1	1	0	86.18	4298.9	71.6483	0	4	0
1111	1	75	1	4	1	1	0	86.18	4298.9	71.6483	0	4	0
1112	1	75	1	2	1	1	0	86.18	4298.9	71.6483	0	4	0
1113	1	75	1	4	1	1	0	86.18	4298.9	71.6483	0	4	0
1114	1	47	1	2	1	1	0	51.66	4229	70.4833	0	4	0
1115	1	47	1	3	1	1	0	51.66	4229	70.4833	0	4	0
1116	1	58	1	2	1	1	0	30.6	2422.2	40.37	0	4	0
1117	1	58	1	3	1	1	0	30.6	2422.2	40.37	0	4	0
1118	0	55	1	5	1	1	0	686.34	30229.2	503.82	0	4	0
1119	0	55	1	5	1	1	1	686.34	30229.2	503.82	0	4	0
1120	1	65	0	5	1	1	1	1108.99	47515.4	791.923	0	4	0
1121	1	65	0	5	1	1	0	1108.99	47515.4	791.923	0	4	0
1122	0	26	1	5	1	1	0	77.97	3998.1	66.635	0	4	0
1123	1	60	0	5	1	1	0	13.06	1057.6	17.6267	0	4	0
1124	1	70	0	5	1	1	0	12.34	1026.7	17.1117	0	4	0
1125	1	57	1	4	1	1	0	23.14	1553	25.8833	0	4	0
1126	1	57	1	4	1	1	0	23.14	1553	25.8833	0	4	0
1127	1	56	1	3	1	1	0	70.41	3643.9	60.7317	0	4	0
1128	0	38	1	3	1	1	0	60.99	3186.2	53.1033	0	4	0
1129	1	74	1	4	1	1	0	5.23	547.9	9.13167	0	4	0
1130	1	74	1	4	1	1	0	5.23	547.9	9.13167	0	4	0
1131	1	74	1	4	1	1	0	5.23	547.9	9.13167	0	4	0
1132	1	74	1	4	1	1	0	5.23	547.9	9.13167	0	4	0
1133	0	54	1	4	1	0	0	27.97	2041.9	34.0317	5	4	0
1134	0	43	1	2	1	1	0	7.37	715.1	11.9183	0	4	0
1135	0	43	1	3	1	1	0	7.37	715.1	11.9183	0	4	0
1136	1	43	1	3	1	1	0	88.48	4504.7	75.0783	0	4	0
1137	1	43	1	2	1	1	0	88.48	4504.7	75.0783	0	4	0
1138	1	71	1	3	1	1	0	13	1084	18.0667	0	4	0
1139	0	48	1	1	1	1	0	77.97	3998.1	66.635	0	4	0
1140	0	48	1	2	1	1	0	77.97	3998.1	66.635	0	4	0
1141	0	33	1	7	1	1	0	5.23	547.9	9.13167	19	4	0
1142	1	21	1	7	1	1	0	8.52	717.9	11.965	0	4	0
1143	1	65	1	2	1	0	0	92.48	4340.3	72.3383	0	4	0
1144	1	64	0	4	1	1	0	27.97	2041.9	34.0317	0	4	0
1145	1	64	0	4	1	1	0	27.97	2041.9	34.0317	0	4	0
1146	1	64	0	2	1	1	0	27.97	2041.9	34.0317	0	4	0
1147	1	47	1	3	1	1	0	56.58	3004.1	50.0683	0	4	0
1148	1	47	1	2	1	1	0	56.58	3004.1	50.0683	0	4	0
1149	1	29	1	3	1	1	0	10.19	911.6	15.1933	0	4	0
1150	1	29	1	2	1	1	0	10.19	911.6	15.1933	0	4	0
1151	0	52	1	1	1	1	0	32.56	2551.6	42.5267	0	4	0
1152	0	52	1	2	1	1	0	32.56	2551.6	42.5267	0	4	0
1153	1	49	1	1	1	1	0	4.84	443.6	7.39333	0	4	0
1154	1	49	1	2	1	1	0	4.84	443.6	7.39333	0	4	0
1155	1	49	1	3	1	1	0	51.66	4229	70.4833	0	4	0
1156	1	49	1	2	1	1	0	51.66	4229	70.4833	0	4	0
1157	0	87	1	3	1	1	0	105.29	5648.1	94.135	0	4	0
1158	1	46	1	1	1	1	0	1336.17	61377.2	1022.95	0	4	0
1159	1	46	1	2	1	1	0	1336.17	61377.2	1022.95	0	4	0
1160	1	65	0	2	1	1	0	9.5	831	13.85	0	4	0
1161	1	65	0	3	1	1	0	9.5	831	13.85	0	4	0
1162	0	43	1	1	1	1	0	84.34	4310.5	71.8417	0	4	0
1163	0	45	1	7	1	1	0	13.64	1240.3	20.6717	0	4	0
1164	1	57	1	3	1	1	0	19.53	1399.7	23.3283	0	4	0
1165	1	57	1	2	1	1	0	19.53	1399.7	23.3283	0	4	0
1166	0	70	1	1	1	1	0	25.82	1591.5	26.525	0	4	0
1167	0	70	1	2	1	1	0	25.82	1591.5	26.525	0	4	0
1168	1	74	1	4	1	0	0	263.47	13188.1	219.802	0	4	0
1169	1	74	1	2	1	0	0	263.47	13188.1	219.802	0	4	0
1170	1	74	1	2	1	0	0	263.47	13188.1	219.802	0	4	0
1171	1	74	1	4	1	0	0	263.47	13188.1	219.802	0	4	0
1172	1	74	1	4	1	0	0	263.47	13188.1	219.802	0	4	0
1173	1	48	1	4	1	1	0	1098.96	45419.5	756.992	0	4	0
1174	1	48	1	4	1	1	0	1098.96	45419.5	756.992	0	4	0
1175	1	48	1	2	1	1	0	1098.96	45419.5	756.992	0	4	0
1176	1	48	1	2	1	1	0	1098.96	45419.5	756.992	0	4	0
1177	1	48	1	4	1	1	0	1098.96	45419.5	756.992	0	4	0
1178	1	48	1	4	1	1	0	1098.96	45419.5	756.992	0	4	0
1179	1	34	0	4	1	1	0	1049.27	46540.4	775.673	0	4	0
1180	1	34	0	4	1	1	0	1049.27	46540.4	775.673	0	4	0
1181	1	34	0	4	1	1	0	1049.27	46540.4	775.673	0	4	0
1182	1	34	0	2	1	1	0	1049.27	46540.4	775.673	0	4	0
1183	0	70	1	4	1	1	0	51.66	4229	70.4833	0	4	0
1184	0	70	1	4	1	1	0	51.66	4229	70.4833	0	4	0
1185	0	70	1	4	1	1	0	51.66	4229	70.4833	0	4	0
1186	1	42	1	5	1	1	0	81.96	4028.4	67.14	0	4	0
1187	1	60	0	1	1	1	0	689.2	27796.1	463.268	0	4	0
1188	1	60	0	2	1	1	0	689.2	27796.1	463.268	0	4	0
1189	1	60	0	2	1	1	0	689.2	27796.1	463.268	0	4	0
1190	1	60	0	2	1	1	0	689.2	27796.1	463.268	0	4	0
1191	1	46	1	3	1	1	0	47.82	2921.3	48.6883	0	4	0
1192	0	53	1	2	1	1	0	22.04	1418.3	23.6383	0	4	0
1193	0	53	1	1	1	1	0	22.04	1418.3	23.6383	0	4	0
1194	1	41	1	1	1	1	0	28.15	2080.4	34.6733	0	4	0
1195	0	82	1	5	1	1	0	47.88	2498.9	41.6483	0	4	0
1196	1	50	1	4	1	1	0	26.28	2039.4	33.99	0	4	0
1197	1	50	1	4	1	1	0	26.28	2039.4	33.99	0	4	0
1198	1	50	1	4	1	1	0	26.28	2039.4	33.99	0	4	0
1199	1	50	1	2	1	1	0	26.28	2039.4	33.99	0	4	0
1200	0	65	1	2	1	1	0	66.95	3770.8	62.8467	0	4	0
1201	0	65	1	2	1	1	0	66.95	3770.8	62.8467	0	4	0
1202	0	65	1	2	1	1	0	66.95	3770.8	62.8467	0	4	0
1203	0	56	1	2	1	1	0	67.21	3416.6	56.9433	0	4	0
1204	0	56	1	2	1	1	0	67.21	3416.6	56.9433	0	4	0
1205	0	56	1	2	1	1	0	67.21	3416.6	56.9433	0	4	0
1206	0	56	1	2	1	1	0	67.21	3416.6	56.9433	0	4	0
1207	0	55	1	5	1	1	0	686.34	30229.2	503.82	0	4	0
1208	0	55	1	5	1	1	1	686.34	30229.2	503.82	0	1	0
1209	0	56	1	2	1	1	0	34.66	2236.6	37.2767	0	1	0
1210	0	60	1	4	1	1	0	51.66	4229	70.4833	0	1	0
1211	0	60	1	4	1	1	0	51.66	4229	70.4833	0	1	0
1212	0	60	1	2	1	1	0	51.66	4229	70.4833	0	1	0
1213	0	60	1	4	1	1	0	51.66	4229	70.4833	0	1	0
1214	1	42	1	7	1	1	0	118.34	5795.7	96.595	6	1	0
1215	1	50	0	7	1	1	0	108.09	5055.7	84.2617	5	1	0
1216	0	27	0	4	1	1	0	9.47	909.2	15.1533	5	1	0
1217	0	75	0	4	1	1	0	119.05	5390	89.8333	0	1	0
1218	1	40	0	1	1	0	0	19.85	1356	22.6	34	1	0
1219	1	57	1	4	1	1	0	95.96	5001.6	83.36	0	1	0
1220	1	66	1	4	1	1	0	21.46	1651.5	27.525	0	1	0
1221	0	28	0	4	1	1	0	1222.08	50715.2	845.253	0	1	0
1222	1	41	1	4	1	1	0	24.02	1543.2	25.72	0	1	0
1223	0	48	1	4	1	1	0	30.24	2244.6	37.41	0	4	0
1224	1	52	1	4	1	1	0	143.63	6404.6	106.743	0	4	0
1225	0	50	1	4	0	1	0	16.08	1370.4	22.84	0	4	0
1226	1	68	1	4	1	0	0	13.39	1340.9	22.3483	0	4	0
1227	0	83	1	4	0	1	0	9.41	816.7	13.6117	0	4	0
1228	0	67	0	4	1	1	0	86.12	4407.6	73.46	0	4	0
1229	0	55	1	4	0	1	0	18.98	1341.6	22.36	0	4	0
1230	0	69	1	4	0	1	0	8.63	759.5	12.6583	1	4	0
1231	1	75	1	4	0	0	0	263.47	13188.1	219.802	0	4	0
1232	0	36	1	4	0	1	0	80.14	4001.4	66.69	0	4	0
1233	0	65	1	4	0	1	0	84.34	4310.5	71.8417	0	4	0
1234	0	48	1	4	0	1	0	51.34	3009.2	50.1533	0	4	0
1235	1	39	1	4	1	1	0	8.52	717.9	11.965	0	4	0
1236	1	72	0	4	0	1	0	11.97	998.4	16.64	0	4	0
1237	0	41	1	4	0	1	0	89.24	4485.5	74.7583	0	4	0
1238	0	65	1	4	0	1	0	42.12	3136.9	52.2817	0	4	0
1239	0	71	1	4	0	1	0	47.88	2498.9	41.6483	0	4	0
1240	0	81	1	4	0	1	0	23.37	1554.4	25.9067	0	4	0
1241	0	49	1	4	0	1	0	30.24	2244.6	37.41	0	4	0
1242	0	41	1	4	0	1	0	89.24	4485.5	74.7583	0	4	0
1243	0	74	1	4	0	1	0	12.34	1026.7	17.1117	0	4	0
1244	1	53	1	4	1	1	0	34.87	2766.1	46.1017	0	4	0
1245	1	48	1	4	0	1	0	18.11	1504.5	25.075	0	4	0
1246	1	59	1	4	0	1	0	5.89	548.6	9.14333	0	4	0
1247	0	46	1	4	0	0	0	26.48	2011.6	33.5267	0	4	0
1248	0	63	1	4	0	1	0	51.07	2754.3	45.905	0	4	0
1249	1	62	1	4	0	1	0	45.07	2541	42.35	0	4	0
1250	0	40	1	4	0	1	0	25.73	2124.4	35.4067	0	4	0
1251	0	52	1	4	0	1	0	12.62	1177.6	19.6267	0	4	0
1252	1	57	1	4	1	1	0	23.14	1553	25.8833	0	4	0
1253	1	76	1	4	0	1	0	52.27	2770	46.1667	0	4	0
1254	1	67	1	4	0	1	0	23.37	1554.4	25.9067	0	4	0
1255	1	76	1	4	0	1	0	52.27	2770	46.1667	0	4	0
1256	0	30	0	4	0	1	0	82.09	4506.4	75.1067	0	4	0
1257	1	92	0	4	0	1	0	89.99	4546.4	75.7733	0	4	0
1258	1	69	1	4	0	1	0	12.64	1114.3	18.5717	0	4	0
1259	1	59	1	4	0	1	0	5.89	548.6	9.14333	0	4	0
1260	1	65	1	4	0	1	0	51.66	4229	70.4833	0	4	0
1261	1	44	1	4	0	1	0	26.54	1970.7	32.845	0	4	0
1262	0	63	1	4	0	1	0	51.34	3009.2	50.1533	0	4	0
1263	0	70	1	4	0	1	0	54.46	2991.7	49.8617	0	4	0
1264	1	28	1	4	0	1	0	18.17	1465.8	24.43	0	4	0
1265	0	63	1	4	0	1	0	268.61	12499.3	208.322	0	4	0
1266	0	63	1	4	0	1	0	51.34	3009.2	50.1533	0	4	0
1267	0	72	1	4	0	1	0	30.6	2422.2	40.37	0	4	0
1268	0	61	1	4	0	1	0	105.5	5502	91.7	0	4	0
1269	0	45	1	4	0	1	0	19.85	1356	22.6	0	4	0
1270	1	28	1	4	0	1	0	18.17	1465.8	24.43	0	4	0
1271	1	81	0	4	0	1	0	197.52	10469.9	174.498	0	4	0
1272	0	30	0	4	0	1	0	82.09	4506.4	75.1067	0	4	0
1273	1	80	0	4	0	1	0	42.97	2903.5	48.3917	0	4	0
1274	1	80	0	4	0	1	0	42.97	2903.5	48.3917	0	4	0
1275	0	68	0	4	0	1	0	848.61	33378.4	556.307	0	4	0
1276	1	49	1	4	0	1	0	18.17	1465.8	24.43	0	4	0
1277	0	48	1	4	0	1	0	51.34	3009.2	50.1533	0	4	0
1278	1	37	1	4	0	0	0	18.46	1477.9	24.6317	0	4	0
1279	1	77	0	4	0	1	0	42.97	2903.5	48.3917	0	4	0
1280	1	58	1	4	0	1	0	72.92	4276.2	71.27	0	4	0
1281	1	44	1	4	0	1	0	86.18	4298.9	71.6483	0	4	0
1282	0	30	0	4	1	1	0	82.09	4506.4	75.1067	0	4	0
1283	0	69	1	4	0	1	0	51.66	4229	70.4833	0	4	0
1284	0	47	1	4	0	1	0	681.53	27465.6	457.76	0	4	0
1285	0	71	1	4	0	1	0	97.71	5054.4	84.24	0	4	0
1286	0	65	1	4	0	1	0	84.34	4310.5	71.8417	0	4	0
1287	0	47	1	4	0	0	0	23.94	1825.4	30.4233	0	4	0
1288	1	63	1	4	0	1	0	10.08	902.7	15.045	0	4	0
1289	0	49	0	4	0	1	0	5.23	547.9	9.13167	0	4	0
1290	0	39	1	4	0	1	0	20.04	1656.1	27.6017	0	4	0
1291	1	36	0	4	0	1	0	20.3	1422.3	23.705	0	4	0
1292	1	57	1	4	0	1	0	23.14	1553	25.8833	0	4	0
1293	1	76	1	4	0	1	0	52.27	2770	46.1667	0	4	0
1294	0	42	0	4	0	1	0	55.81	2978.2	49.6367	0	4	0
1295	0	46	1	4	0	1	0	647.46	26192.9	436.548	0	4	0
1296	0	70	1	4	1	1	0	514.4	22859.1	380.985	0	4	0
1297	0	63	1	4	0	1	0	30.01	2208.5	36.8083	0	4	0
1298	1	76	1	4	0	1	0	52.27	2770	46.1667	0	4	0
1299	0	80	1	4	0	1	0	26.43	1944.1	32.4017	0	4	0
1300	1	66	1	4	0	1	0	104.66	4931.1	82.185	0	4	0
1301	0	65	1	4	0	1	0	11.37	997	16.6167	0	4	0
1302	0	50	1	4	0	1	0	16.08	1370.4	22.84	0	4	0
1303	0	58	1	4	0	1	0	40.6	3389.2	56.4867	0	4	0
1304	0	74	1	4	0	0	0	9.19	821.7	13.695	0	4	0
1305	0	30	0	4	1	1	0	82.09	4506.4	75.1067	0	4	0
1306	0	54	1	4	0	0	0	7.37	715.1	11.9183	0	4	0
1307	0	74	1	4	0	1	0	43.05	2459.3	40.9883	0	4	0
1308	0	42	0	4	0	1	0	55.81	2978.2	49.6367	0	4	0
1309	1	79	0	4	0	1	0	51.66	4229	70.4833	0	4	0
1310	0	65	1	4	0	1	0	42.12	3136.9	52.2817	0	4	0
1311	1	66	1	4	0	1	0	9.47	909.2	15.1533	0	4	0
1312	0	54	1	4	1	0	0	7.37	715.1	11.9183	0	4	0
1313	0	65	1	4	0	1	0	42.12	3136.9	52.2817	0	4	0
1314	0	74	1	4	0	1	0	43.05	2459.3	40.9883	0	4	0
1315	1	54	1	4	0	1	0	303.47	13645.6	227.427	0	4	0
1316	1	75	1	4	0	1	0	86.18	4298.9	71.6483	0	4	0
1317	0	62	1	4	0	1	0	324.19	15552.7	259.212	0	4	0
1318	1	54	1	4	0	1	0	303.47	13645.6	227.427	0	4	0
1319	1	57	1	4	0	1	0	23.14	1553	25.8833	0	4	0
1320	1	57	1	4	0	1	0	23.14	1553	25.8833	0	4	0
1321	1	75	1	4	0	0	0	263.47	13188.1	219.802	0	4	0
1322	1	64	0	4	0	1	0	27.97	2041.9	34.0317	0	4	0
1323	1	64	0	4	0	1	0	27.97	2041.9	34.0317	0	4	0
1324	0	75	0	4	0	1	0	119.05	5390	89.8333	0	4	0
1325	0	75	0	4	0	1	0	119.05	5390	89.8333	0	4	0
1326	0	75	0	4	0	1	0	119.05	5390	89.8333	0	4	0
1327	0	75	0	4	0	1	0	119.05	5390	89.8333	0	4	0
1328	1	50	1	4	0	1	0	26.28	2039.4	33.99	0	4	0
1329	0	74	1	4	0	0	0	9.19	821.7	13.695	0	4	0
1330	1	75	1	4	0	0	0	263.47	13188.1	219.802	0	4	0
1331	1	48	1	4	1	1	0	1098.96	45419.5	756.992	0	4	0
1332	1	34	0	4	0	1	0	1049.27	46540.4	775.673	0	4	0
1333	0	70	1	4	1	1	0	51.66	4229	70.4833	0	4	0
1334	0	48	1	4	0	1	0	51.34	3009.2	50.1533	0	4	0
1335	1	50	1	4	0	1	0	26.28	2039.4	33.99	0	4	0
1336	0	75	0	4	0	1	0	119.05	5390	89.8333	0	1	0
1337	0	60	1	4	0	1	0	51.66	4229	70.4833	0	1	0
1338	1	54	0	7	1	1	0	831.26	32596.8	543.28	0	1	0
1339	0	64	1	7	1	1	0	823.82	35914.6	598.577	0	4	0
1340	0	63	1	7	0	1	0	23.37	1666.6	27.7767	0	4	0
1341	0	63	1	7	0	1	0	74.15	3726.8	62.1133	0	4	0
1342	0	52	1	7	0	1	0	1067.42	45662.3	761.038	0	4	0
1343	1	79	0	2	0	1	0	13.77	1210.8	20.18	0	4	0
1344	1	62	1	2	0	1	0	56.13	2779.9	46.3317	0	4	0
1345	0	74	1	4	1	1	1	26.16	1907.1	31.785	0	1	0
1346	0	75	1	4	0	1	0	26.16	1907.1	31.785	0	1	0
1347	1	67	0	4	0	1	0	51.66	4229	70.4833	1	1	0
1348	1	69	1	4	0	1	0	21.81	1655.5	27.5917	1	1	0
1349	0	74	1	4	1	1	0	26.16	1907.1	31.785	0	1	0
1350	1	42	1	4	0	1	0	24.02	1543.2	25.72	0	1	0
1351	0	57	1	4	0	0	0	42.97	2903.5	48.3917	0	1	0
1352	1	70	0	4	1	0	0	51.07	2754.3	45.905	0	1	0
1353	0	56	1	4	1	0	0	42.97	2903.5	48.3917	0	1	0
1354	0	72	0	4	0	1	0	27	2069	34.4833	0	1	0
1355	0	41	1	4	0	1	0	89.24	4485.5	74.7583	0	4	0
1356	1	53	1	4	1	1	0	34.87	2766.1	46.1017	0	4	0
1357	1	57	1	4	1	1	0	23.14	1553	25.8833	0	4	0
1358	1	76	1	4	0	1	0	52.27	2770	46.1667	0	4	0
1359	1	76	1	4	0	1	0	52.27	2770	46.1667	0	4	0
1360	1	69	1	4	0	1	0	12.64	1114.3	18.5717	0	4	0
1361	1	59	1	4	0	1	0	5.89	548.6	9.14333	0	4	0
1362	1	44	1	4	0	1	0	26.54	1970.7	32.845	0	4	0
1363	0	63	1	4	0	1	0	51.34	3009.2	50.1533	0	4	0
1364	0	70	1	4	0	1	0	54.46	2991.7	49.8617	0	4	0
1365	0	72	1	4	0	1	0	30.6	2422.2	40.37	0	4	0
1366	1	80	0	4	0	1	0	42.97	2903.5	48.3917	0	4	0
1367	1	37	1	4	0	0	0	18.46	1477.9	24.6317	0	4	0
1368	1	58	1	4	0	1	0	72.92	4276.2	71.27	0	4	0
1369	1	44	1	4	0	1	0	86.18	4298.9	71.6483	0	4	0
1370	0	30	0	4	1	1	0	82.09	4506.4	75.1067	0	4	0
1371	1	36	0	4	0	1	0	20.3	1422.3	23.705	0	4	0
1372	1	76	1	4	0	1	0	52.27	2770	46.1667	0	4	0
1373	0	30	0	4	1	1	0	82.09	4506.4	75.1067	0	4	0
1374	1	79	0	4	0	1	0	51.66	4229	70.4833	0	4	0
1375	0	65	1	4	0	1	0	42.12	3136.9	52.2817	0	4	0
1376	1	55	1	4	0	0	0	52.75	3779.3	62.9883	19	4	0
1377	0	65	1	4	0	1	0	42.12	3136.9	52.2817	0	4	0
1378	1	54	1	4	0	1	0	303.47	13645.6	227.427	0	4	0
1379	1	54	1	4	0	1	0	303.47	13645.6	227.427	0	4	0
1380	1	75	1	4	0	0	0	263.47	13188.1	219.802	0	4	0
1381	1	64	0	4	0	1	0	27.97	2041.9	34.0317	0	4	0
1382	0	75	0	4	0	1	0	119.05	5390	89.8333	0	4	0
1383	0	75	0	4	1	1	0	119.05	5390	89.8333	0	4	0
1384	0	75	0	4	0	1	0	119.05	5390	89.8333	0	4	0
1385	0	75	0	4	0	1	0	119.05	5390	89.8333	0	4	0
1386	0	74	1	4	0	0	0	9.19	821.7	13.695	0	4	0
1387	0	48	1	4	0	1	0	51.34	3009.2	50.1533	0	4	0
1388	1	58	1	5	0	1	0	95.96	5001.6	83.36	0	1	0
1389	0	62	1	5	1	1	0	23.89	1925	32.0833	0	4	0
1390	0	47	1	5	1	1	0	1377.09	57850	964.167	0	4	0
1391	1	59	1	5	0	1	0	42.97	2903.5	48.3917	0	4	0
1392	1	59	1	5	0	1	0	42.97	2903.5	48.3917	0	1	0
1393	1	59	1	5	0	1	0	42.97	2903.5	48.3917	0	1	0
1394	1	59	1	5	0	1	0	42.97	2903.5	48.3917	0	1	0
1395	0	51	1	1	0	1	0	42.97	2903.5	48.3917	0	4	0
1396	1	65	1	2	1	0	1	10.19	911.6	15.1933	0	1	0
1397	0	72	1	2	1	0	1	83.99	4168.9	69.4817	0	1	0
1398	1	60	1	2	1	0	1	69.18	3521.6	58.6933	0	1	0
1399	1	65	1	2	1	0	1	10.19	911.6	15.1933	0	1	0
1400	1	61	1	2	0	1	0	8.65	1018.9	16.9817	0	4	0
1401	1	70	0	4	1	0	0	51.07	2754.3	45.905	0	1	0
1402	1	72	0	4	0	1	0	11.97	998.4	16.64	0	4	0
1403	1	44	1	2	1	0	0	83.99	4168.9	69.4817	0	1	0
1404	1	33	1	2	1	0	0	23.37	1666.6	27.7767	0	1	0
1405	1	65	1	2	1	0	0	77.97	3998.1	66.635	0	1	0
1406	1	67	0	2	1	0	0	18.46	1477.9	24.6317	1	1	0
1407	0	55	1	2	1	0	0	52.12	2758	45.9667	0	1	0
1408	1	28	1	2	1	0	0	16.79	1253.2	20.8867	0	1	0
1409	1	60	0	2	1	0	0	48.63	2541.1	42.3517	0	1	0
1410	1	51	1	2	1	0	0	83.99	4168.9	69.4817	0	1	0
1411	1	44	1	2	1	0	0	43.05	2459.3	40.9883	0	1	0
1412	0	40	1	2	1	0	0	12.34	1026.7	17.1117	0	1	0
1413	1	44	1	2	1	0	0	119.09	6550.2	109.17	0	1	0
1414	0	30	0	2	1	0	0	1097.02	43540.3	725.672	0	1	0
1415	1	60	0	2	1	0	0	22.6	1645	27.4167	0	1	0
1416	1	25	1	2	1	0	0	51.07	2754.3	45.905	0	1	0
1417	0	45	1	2	1	0	0	5.23	547.9	9.13167	0	1	0
1418	0	30	0	2	1	0	0	49.35	2611.7	43.5283	0	1	0
1419	1	51	1	2	1	0	0	11.26	983.5	16.3917	0	1	0
1420	1	41	1	2	1	1	0	54.76	2910.6	48.51	0	4	0
1421	1	47	1	3	0	1	0	37.47	2649.7	44.1617	0	1	0
1422	1	62	0	3	0	1	0	5.23	547.9	9.13167	0	1	0
1423	1	36	1	3	1	1	0	51.66	4229	70.4833	0	1	0
1424	1	56	1	3	0	1	0	57.09	3027.4	50.4567	0	4	0
1425	1	41	1	5	0	1	1	7.7	643.6	10.7267	0	1	0
1426	1	54	0	5	0	1	1	83.87	4210.2	70.17	0	1	0
1427	1	41	1	5	0	0	0	9.47	909.2	15.1533	2	1	0
1428	1	59	0	5	0	1	0	32.56	2551.6	42.5267	0	1	0
1429	0	52	1	5	1	1	0	57.59	3082.8	51.38	0	4	0
1430	1	70	0	5	0	1	0	9.19	821.7	13.695	0	4	0
1431	0	63	1	5	0	1	0	74.15	3726.8	62.1133	0	4	0
1432	0	67	1	5	0	1	0	176.96	7928.7	132.145	0	4	0
1433	1	57	1	5	0	1	0	23.14	1553	25.8833	0	4	0
1434	1	57	1	5	0	1	0	23.14	1553	25.8833	0	4	0
1435	1	59	1	5	0	1	0	5.89	548.6	9.14333	0	4	0
1436	1	59	1	5	0	1	0	5.89	548.6	9.14333	0	4	0
1437	0	45	1	5	0	1	0	19.38	1590.2	26.5033	0	4	0
1438	0	58	1	5	0	1	0	5.23	547.9	9.13167	0	4	0
1439	0	48	1	5	0	1	0	1377.09	57850	964.167	0	4	0
1440	1	58	1	5	0	1	0	72.92	4276.2	71.27	0	4	0
1441	0	47	1	5	0	1	0	681.53	27465.6	457.76	0	4	0
1442	1	44	1	5	0	1	0	86.18	4298.9	71.6483	0	4	0
1443	0	67	1	5	0	1	0	48.75	2490.6	41.51	0	4	0
1444	1	57	1	5	0	1	0	23.14	1553	25.8833	0	4	0
1445	0	62	1	5	1	1	0	23.89	1925	32.0833	0	4	0
1446	1	56	1	5	0	1	0	28.15	2209.8	36.83	0	4	0
1447	0	42	1	5	0	1	0	18.2	1304.1	21.735	0	4	0
1448	0	47	1	5	1	1	0	1377.09	57850	964.167	0	4	0
1449	1	59	1	5	0	1	0	42.97	2903.5	48.3917	0	4	0
1450	0	75	1	5	0	1	0	8.25	723.1	12.0517	0	4	0
1451	0	75	1	5	0	1	0	8.25	723.1	12.0517	0	4	0
1452	0	48	1	5	0	1	0	1377.09	57850	964.167	0	4	0
1453	0	75	0	5	1	1	0	119.05	5390	89.8333	0	4	0
1454	0	48	1	5	0	1	0	51.34	3009.2	50.1533	0	4	0
1455	0	67	1	5	0	1	0	26.88	2018	33.6333	0	4	0
1456	0	67	1	1	1	0	0	57.09	3027.4	50.4567	1	1	0
1457	0	67	1	1	1	0	0	57.09	3027.4	50.4567	1	1	0
1458	0	67	1	1	1	0	0	57.09	3027.4	50.4567	1	1	0
1459	0	47	0	1	1	0	0	22.59	1708.2	28.47	1	1	0
1460	1	31	1	1	1	0	0	52.86	2869.9	47.8317	1	1	0
1461	0	50	1	1	1	0	0	21.34	1552.6	25.8767	1	1	0
1462	0	50	1	1	1	0	0	21.34	1552.6	25.8767	1	1	0
1463	0	50	1	1	1	0	0	21.34	1552.6	25.8767	1	1	0
1464	1	69	1	1	1	0	0	61.97	3209.1	53.485	0	1	0
1465	1	69	1	1	1	0	0	61.97	3209.1	53.485	0	1	0
1466	1	69	1	1	1	0	0	61.97	3209.1	53.485	0	1	0
1467	1	60	0	1	1	0	0	10.19	911.6	15.1933	0	1	0
1468	1	60	0	1	1	0	0	10.19	911.6	15.1933	0	1	0
1469	1	60	0	1	1	0	0	10.19	911.6	15.1933	0	1	0
1470	1	51	1	1	1	0	0	11.26	983.5	16.3917	1	1	0
1471	1	51	1	1	1	0	0	11.26	983.5	16.3917	1	1	0
1472	1	51	1	1	1	0	0	11.26	983.5	16.3917	1	1	0
1473	1	51	1	1	1	0	0	11.26	983.5	16.3917	1	1	0
1474	1	51	1	1	1	0	0	52.12	2758	45.9667	1	1	0
1475	1	51	1	1	1	0	0	52.12	2758	45.9667	1	1	0
1476	1	51	1	1	1	0	0	52.12	2758	45.9667	1	1	0
1477	1	51	1	1	1	0	0	52.12	2758	45.9667	1	1	0
1478	1	56	1	1	1	0	0	18.2	1304.1	21.735	1	1	0
1479	1	56	1	1	1	0	0	18.2	1304.1	21.735	1	1	0
1480	0	64	1	1	1	0	0	59.65	3143.8	52.3967	0	1	0
1481	0	78	1	1	1	0	0	964.34	40945.3	682.422	0	1	0
1482	0	78	1	1	1	0	0	964.34	40945.3	682.422	0	1	0
1483	0	78	1	1	1	0	0	964.34	40945.3	682.422	0	1	0
1484	1	79	0	1	0	1	0	13.77	1210.8	20.18	0	4	0
1485	0	39	1	1	1	0	0	54.97	2932.5	48.875	0	1	0
1486	0	45	1	1	1	0	0	92.48	4340.3	72.3383	5	1	0
1487	0	48	1	1	1	0	0	48.75	2490.6	41.51	0	1	0
1488	0	37	1	1	1	0	0	19.85	1356	22.6	0	1	0
1489	1	77	0	1	1	0	0	8.82	779.4	12.99	0	1	0
1490	0	80	0	1	0	0	0	42.97	2903.5	48.3917	0	4	0
1491	0	74	1	1	0	1	0	8.52	717.9	11.965	0	4	0
1492	0	71	1	1	0	0	0	21.46	1651.5	27.525	1	4	0
1493	1	61	1	1	0	1	0	122.91	5807.5	96.7917	0	4	0
1494	1	70	0	4	1	0	0	51.07	2754.3	45.905	0	1	0
1495	1	53	1	4	1	1	0	34.87	2766.1	46.1017	0	4	0
1496	0	30	0	4	0	1	0	82.09	4506.4	75.1067	0	4	0
1497	1	36	0	4	0	1	0	20.3	1422.3	23.705	0	4	0
1498	1	37	1	6	0	0	1	18.46	1477.9	24.6317	0	4	0
1499	0	56	1	6	0	1	1	24.88	1875	31.25	0	4	0
1500	1	76	1	6	0	0	1	18.37	1471	24.5167	2	4	0
1501	1	88	0	6	0	1	1	24.44	1916	31.9333	0	4	0
1502	0	74	1	6	0	1	1	149.81	6605.9	110.098	0	4	0
1503	1	70	0	6	0	1	1	75.16	3776.9	62.9483	0	4	0
1504	0	58	1	6	0	1	1	55.89	3121.2	52.02	0	4	0
1505	1	79	0	2	0	1	0	13.77	1210.8	20.18	0	4	0
1506	0	34	1	2	0	1	0	9.16	816.6	13.61	0	4	0
1507	1	57	1	2	0	1	0	82.34	4010.6	66.8433	0	4	0
1508	1	70	0	2	1	0	0	51.07	2754.3	45.905	0	1	0
1509	1	53	1	2	1	1	0	34.87	2766.1	46.1017	0	4	0
1510	1	60	1	3	0	1	0	19.52	1366.7	22.7783	0	1	0
1511	1	39	1	3	0	1	0	58.14	3094.8	51.58	0	4	0
1512	1	47	1	2	0	1	0	37.47	2649.7	44.1617	0	1	0
1513	1	62	0	2	0	1	0	5.23	547.9	9.13167	0	1	0
1514	0	56	1	2	0	0	0	52.12	2758	45.9667	0	1	0
1515	0	49	0	2	0	1	0	5.23	547.9	9.13167	0	4	0
1516	1	63	1	2	0	1	0	10.08	902.7	15.045	0	4	0
1517	1	67	0	2	0	1	0	51.66	4229	70.4833	7	1	0
1518	1	70	0	2	1	0	0	51.07	2754.3	45.905	0	1	0
1519	1	53	1	2	1	1	0	34.87	2766.1	46.1017	0	4	0
1520	1	79	0	2	0	1	0	13.77	1210.8	20.18	0	4	0
1521	1	57		2	1	1	0	95.96	5001.6	83.36	0	1	0
1522	1	59		1	1	1	0	7.44	629.1	10.485	0	1	0
1523	0	53		2	1	1	0	111.01	5188.7	86.4783	0	1	0
1524	0	47		2	1	1	0	60.72	3158	52.6333	0	1	0
1525	1	58		1	1	0	0	5.23	547.9	9.13167	12	1	0
1526	1	61		1	1	1	0	83.99	4168.9	69.4817	20	1	0
1527	1	72		2	1	1	0	47.54	2891.8	48.1967	0	1	0
1528	1	72		2	1	1	0	92.48	4686.5	78.1083	0	1	0
1529	0	32		1	1	1	0	58.42	3086.6	51.4433	55	1	0
1530	1	58		2	1	1	0	5.23	547.9	9.13167	20	1	1
1531	0	55		1	1	1	0	24.44	1916	31.9333	32	1	0
1532	1	68		2	1	1	1	1173.63	50409.1	840.152	0	1	0
1533	0	61		1	1	1	0	21.6	1464.4	24.4067	0	1	0
1534	1	68		1	1	1	0	1173.63	50409.1	840.152	0	1	0
1535	0	56		2	1	1	0	55.43	2870.3	47.8383	0	1	0
1536	1	25		1	1	1	0	18.98	1341.6	22.36	6	1	0
1537	1	66		2	1	1	0	61.44	3206	53.4333	0	1	0
1538	1	86		2	1	1	0	12.31	1008.9	16.815	0	1	0
1539	0	56		1	1	1	0	55.43	2870.3	47.8383	26	1	0
1540	1	39		2	1	1	1	7.25	624.6	10.41	0	1	0
1541	1	39		1	1	1	1	7.25	624.6	10.41	0	1	0
1542	0	48		2	1	1	0	53.68	2792.3	46.5383	0	1	0
1543	1	57		2	1	1	0	92.48	4340.3	72.3383	0	1	0
1544	1	57		1	1	1	1	92.48	4340.3	72.3383	0	1	0
1545	0	59		1	1	1	0	27.58	2003.8	33.3967	0	1	0
1546	1	29		2	1	1	0	10.19	911.6	15.1933	0	1	0
1547	1	29		1	1	1	0	10.19	911.6	15.1933	0	1	0
1548	0	65		2	1	1	0	30.6	2422.2	40.37	0	1	0
1549	0	54		2	1	0	0	9.41	816.7	13.6117	337	1	1
1550	0	65		1	1	1	0	54.76	2910.6	48.51	0	1	0
1551	1	72		2	1	1	0	8.25	723.1	12.0517	0	1	0
1552	1	31		2	1	1	0	77.97	3998.1	66.635	53	1	0
1553	0	73		1	1	1	0	34.87	2766.1	46.1017	0	1	0
1554	1	44		2	1	1	0	8.52	717.9	11.965	53	1	0
1555	1	60		1	1	1	0	21.34	1552.6	25.8767	53	1	1
1556	0	46		2	1	0	1	61.25	3306.4	55.1067	7	1	0
1557	0	46		1	1	0	0	61.25	3306.4	55.1067	7	1	0
1558	0	58		1	1	0	0	689.22	30497.9	508.298	42	1	0
1559	1	64		2	1	0	0	57.59	3082.8	51.38	5	1	1
1560	1	73		1	1	0	0	28.15	2080.4	34.6733	42	1	1
1561	0	54		2	1	0	0	103.71	5156.4	85.94	0	1	0
1562	1	49		2	1	1	0	11.97	998.4	16.64	0	1	0
1563	1	65		1	1	0	0	21.46	1651.5	27.525	26	1	0
1564	0	91		1	1	0	0	361.12	16047.4	267.457	0	1	0
1565	0	74		2	1	1	0	16.39	1330	22.1667	0	1	0
1566	1	34		2	1	1	0	9.95	850.7	14.1783	50	1	0
1567	1	50		1	1	1	0	17.01	1404	23.4	0	1	0
1568	1	55		2	1	1	0	10.34	893.7	14.895	0	1	0
1569	1	65		2	1	1	0	22.6	1645	27.4167	0	1	0
1570	0	41		1	1	1	1	107.44	5427.2	90.4533	0	1	0
1571	0	41		2	1	1	0	5.23	547.9	9.13167	0	1	0
1572	1	85		2	1	1	0	626.13	27959.2	465.987	0	1	0
1573	0	60		2	1	1	1	19.52	1366.7	22.7783	0	1	0
1574	0	60		1	1	1	1	19.52	1366.7	22.7783	0	1	0
1575	1	50		1	1	1	1	51.66	4229	70.4833	0	1	0
1576	1	19		1	1	1	0	635.32	26747.3	445.788	0	1	0
1577	0	40		2	1	1	0	18.17	1465.8	24.43	0	1	0
1578	0	40		1	1	1	0	18.17	1465.8	24.43	0	1	0
1579	1	29		1	1	1	0	10.19	911.6	15.1933	0	1	0
1580	1	48		2	1	1	0	54.52	2897	48.2833	0	1	0
1581	1	64		2	1	1	0	43.05	2459.3	40.9883	0	1	0
1582	1	64		1	1	1	0	43.05	2459.3	40.9883	0	1	0
1583	1	61		2	1	1	0	12.49	1028.4	17.14	0	1	0
1584	1	24		1	1	1	0	51.42	2702.5	45.0417	40	1	0
1585	0	79		2	1	1	0	9.59	814.4	13.5733	89	1	1
1586	1	24		1	1	1	0	51.42	2702.5	45.0417	0	1	0
1587	1	45		2	1	1	0	54.52	2897	48.2833	62	1	0
1588	0	87		2	1	1	0	34.87	2766.1	46.1017	0	1	0
1589	0	43		2	1	0	0	7.25	624.6	10.41	51	1	1
1590	0	26		1	1	1	0	142.92	6201.9	103.365	0	1	0
1591	0	58		2	1	1	0	58.42	3086.6	51.4433	0	1	0
1592	0	58		1	1	1	0	58.42	3086.6	51.4433	0	1	0
1593	1	29		1	1	1	1	13.48	1089.5	18.1583	0	1	0
1594	0	45		1	1	1	0	47.05	2701.3	45.0217	0	1	0
1595	0	53		1	1	0	0	28.97	2191.8	36.53	43	1	1
1596	1	66		1	1	1	0	54.97	2932.5	48.875	0	1	0
1597	0	74		2	1	1	0	16.39	1330	22.1667	0	1	0
1598	0	38		2	1	1	0	61.46	3183.9	53.065	50	1	1
1599	0	61		1	1	1	0	51.66	4229	70.4833	36	1	1
1600	0	67		2	1	0	0	7.37	715.1	11.9183	0	1	0
1601	0	45		2	1	1	0	47.05	2701.3	45.0217	0	1	0
1602	1	76		2	1	0	0	26.73	2006.8	33.4467	0	1	0
1603	0	56		2	1	0	0	32.18	2426.6	40.4433	1	1	1
1604	1	45		2	1	1	0	16.87	1147.6	19.1267	48	1	0
1605	0	65		1	1	1	0	21.46	1651.5	27.525	0	1	0
1606	1	67		2	1	0	0	11.08	1005	16.75	1	1	0
1607	1	61		2	1	1	0	9.95	850.7	14.1783	0	1	0
1608	1	40		2	1	0	1	21.7	1826.4	30.44	107	1	1
1609	1	40		1	1	0	0	21.7	1826.4	30.44	107	1	1
1610	0	37		1	1	1	0	5.23	547.9	9.13167	0	1	0
1611	0	70		1	1	1	1	18.46	1477.9	24.6317	0	1	0
1612	1	50		2	1	1	0	12.4	1024.4	17.0733	0	1	0
1613	0	73		2	1	1	1	9.56	826.7	13.7783	0	1	0
1614	1	38		2	1	1	1	24.01	1537.1	25.6183	0	1	0
1615	1	55		2	1	1	1	9.66	822.2	13.7033	0	1	0
1616	1	32		1	1	1	1	65.65	3696.7	61.6117	0	1	0
1617	1	34		2	1	1	0	18.2	1304.1	21.735	29	1	1
1618	1	59		2	1	1	0	9.44	849.2	14.1533	0	1	0
1619	1	65		2	1	0	0	5.23	547.9	9.13167	77	1	0
1620	1	62		2	1	0	0	19.52	1366.7	22.7783	1	1	1
1621	1	65		1	1	0	0	5.23	547.9	9.13167	77	1	0
1622	1	37		1	1	1	0	56.13	2779.9	46.3317	51	1	0
1623	0	64		2	1	1	0	30.24	2244.6	37.41	56	1	0
1624	0	64		1	1	1	0	30.24	2244.6	37.41	56	1	0
1625	1	56		1	1	1	0	554.6	22986.6	383.11	0	1	0
1626	1	55		1	1	0	0	9.16	816.6	13.61	9	1	0
1627	0	60		1	1	0	0	42.97	2903.5	48.3917	42	1	1
1628	1	34		1	1	1	0	13	1084	18.0667	0	1	0
1629	0	63		2	1	0	0	61.25	3306.4	55.1067	2	1	1
1630	1	55		1	1	1	0	26.73	2006.8	33.4467	0	1	0
1631	0	65		1	1	0	0	5.23	547.9	9.13167	42	1	0
1632	0	56		2	1	0	0	55.29	2907.2	48.4533	51	1	1
1633	1	66		2	1	1	0	5.89	548.6	9.14333	52	1	0
1634	0	64		2	1	1	0	51.66	4229	70.4833	51	1	1
1635	1	65		2	1	0	0	75.51	3850.8	64.18	0	1	0
1636	1	58		1	1	0	0	26.43	1944.1	32.4017	41	1	1
1637	0	74		2	1	1	0	60.42	3080.5	51.3417	0	1	0
1638	1	68		2	1	1	0	21.81	1655.5	27.5917	0	1	0
1639	1	23		2	1	1	0	23.37	1666.6	27.7767	31	1	0
1640	0	54		2	1	1	0	21.46	1651.5	27.525	41	1	0
1641	1	21		1	1	1	0	12.64	1114.3	18.5717	37	1	0
1642	1	81		2	1	1	0	7.16	715.7	11.9283	0	1	0
1643	0	33		2	1	1	0	19.53	1399.7	23.3283	0	1	0
1644	0	33		1	1	1	1	19.53	1399.7	23.3283	0	1	0
1645	0	68		2	1	1	0	12.39	1024	17.0667	0	1	0
1646	0	19		2	1	1	0	35.26	2249	37.4833	0	1	0
1647	1	57		2	1	1	0	43.62	2376.9	39.615	0	1	0
1648	1	31		1	1	1	1	51.07	2754.3	45.905	0	1	0
1649	1	37		2	1	1	0	73.37	4170.6	69.51	0	1	0
1650	1	60		2	1	1	0	84.34	4310.5	71.8417	0	1	0
1651	1	34		2	1	1	1	92.48	4340.3	72.3383	0	1	0
1652	0	80		1	1	1	0	10.19	911.6	15.1933	0	1	0
1653	0	80		2	1	1	0	10.19	911.6	15.1933	0	1	0
1654	1	59		1	1	1	0	51.26	2760.9	46.015	0	1	0
1655	0	91		2	1	0	0	18.98	1341.6	22.36	0	1	0
1656	0	38		2	1	1	0	48.63	2541.1	42.3517	0	1	0
1657	0	65		1	1	1	0	43.05	2459.3	40.9883	35	1	1
1658	1	22		2	1	1	0	150.03	6952.6	115.877	31	1	0
1659	1	55		2	1	1	0	5.23	547.9	9.13167	43	1	1
1660	1	55		1	1	1	0	5.23	547.9	9.13167	43	1	1
1661	1	56		2	1	0	0	17.88	1244.7	20.745	99	1	0
1662	0	51		1	1	1	0	20.3	1422.3	23.705	0	1	0
1663	0	22		2	1	0	0	121.32	5565.6	92.76	0	1	0
1664	0	53		2	1	1	0	111.01	5188.7	86.4783	0	1	0
1665	0	75		1	1	1	0	12.49	995.2	16.5867	42	1	1
1666	1	80		1	1	1	0	42.97	2903.5	48.3917	0	1	0
1667	1	25		2	1	1	0	21.52	1759.8	29.33	46	1	0
1668	1	67		1	1	1	0	55.81	2978.2	49.6367	0	1	0
1669	0	77		2	1	1	0	7.25	624.6	10.41	51	1	0
1670	0	41		2	1	1	0	8.52	717.9	11.965	51	1	0
1671	0	65		2	1	1	0	13.39	1340.9	22.3483	51	1	0
1672	0	65		1	1	1	0	13.39	1340.9	22.3483	51	1	0
1673	0	41		2	1	1	0	5.89	548.6	9.14333	51	1	0
1674	0	52		1	1	1	0	6.38	782.6	13.0433	0	1	0
1675	1	93		2	1	1	0	914.45	39925.7	665.428	0	1	0
1676	1	64		1	1	1	0	142.77	6306.7	105.112	0	1	0
1677	1	68		1	1	1	0	27	2069	34.4833	0	1	0
1678	0	21		2	1	1	0	47.05	2701.3	45.0217	50	1	1
1679	0	36		2	1	1	0	16.46	1355.9	22.5983	42	1	0
1680	0	74		2	1	1	0	16.39	1330	22.1667	0	1	0
1681	1	48		1	1	0	0	22.59	1708.2	28.47	50	1	0
1682	0	39		2	1	0	0	8.52	733.1	12.2183	0	1	0
1683	0	66		1	1	0	0	12.37	1019.1	16.985	35	1	0
1684	1	62		1	1	1	0	23.14	1553	25.8833	0	1	0
1685	0	55		1	1	1	0	114.36	5523.9	92.065	0	1	0
1686	0	50		1	1	1	0	106.33	4997.4	83.29	0	1	0
1687	0	50		2	1	1	0	106.33	4997.4	83.29	0	1	0
1688	1	60		1	1	1	0	9.27	784.8	13.08	0	1	0
1689	1	35		2	1	1	0	48.75	2490.6	41.51	0	1	0
1690	1	62		2	1	1	0	23.14	1553	25.8833	0	1	0
1691	1	61		2	1	1	0	12.53	1046.5	17.4417	0	1	0
1692	0	64		2	1	1	0	19.52	1366.7	22.7783	0	1	0
1693	1	57		2	1	1	0	67.72	3819.5	63.6583	0	1	0
1694	1	57		1	1	1	0	67.72	3819.5	63.6583	0	1	0
1695	0	60		2	1	1	0	77.97	3998.1	66.635	0	1	0
1696	1	33		2	1	1	1	32.18	2426.6	40.4433	0	1	0
1697	0	40		2	1	1	0	11.08	1005	16.75	0	1	0
1698	1	51		2	1	1	0	8.83	735.7	12.2617	0	1	0
1699	0	59		2	1	1	0	7.25	624.6	10.41	0	1	0
1700	1	60		2	1	1	0	16.5	1287.8	21.4633	0	1	0
1701	0	65		1	1	1	0	5.23	547.9	9.13167	19	1	1
1702	0	87		2	1	1	0	34.87	2766.1	46.1017	0	1	0
1703	1	72		2	1	1	0	31.34	2321.3	38.6883	0	1	0
1704	1	58		1	1	0	0	61.25	3306.4	55.1067	32	1	1
1705	1	56		1	1	1	0	20.05	1638.4	27.3067	32	1	0
1706	0	31		2	1	0	0	15.92	1261.5	21.025	48	1	0
1707	0	31		1	1	0	0	15.92	1261.5	21.025	48	1	0
1708	0	52		1	1	0	0	8.25	723.1	12.0517	0	1	0
1709	1	62		1	1	0	1	9.16	816.6	13.61	60	1	1
1710	1	54		2	1	1	0	83.25	4075.1	67.9183	0	1	0
1711	0	74		2	1	0	0	45.19	3634.8	60.58	27	1	0
1712	0	74		1	1	0	0	45.19	3634.8	60.58	283	1	0
1713	1	51		2	1	1	0	22.73	1923.4	32.0567	0	1	0
1714	0	50		1	1	1	0	13	1084	18.0667	0	1	0
1715	0	38		1	1	1	0	17.01	1404	23.4	0	1	0
1716	0	38		2	1	1	0	17.01	1404	23.4	0	1	0
1717	1	49		2	1	1	1	10.19	911.6	15.1933	0	1	0
1718	0	74		1	1	1	0	43.05	2459.3	40.9883	0	1	0
1719	1	62		1	1	0	0	19.52	1366.7	22.7783	5	1	1
1720	1	18		2	1	0	0	240.93	11081.1	184.685	1	1	0
1721	0	34		2	1	1	0	21.46	1651.5	27.525	0	1	0
1722	0	70		1	1	0	0	26.54	1970.7	32.845	15	1	1
1723	0	62		2	1	0	0	18.46	1477.9	24.6317	0	1	0
1724	1	48		2	1	1	0	84.7	4218.7	70.3117	0	1	0
1725	1	48		1	1	1	0	84.7	4218.7	70.3117	0	1	0
1726	1	62		2	1	1	0	5.23	547.9	9.13167	0	1	0
1727	1	71		1	1	1	0	255.82	11337.5	188.958	88	1	1
1728	1	56		2	1	0	0	59.65	3143.8	52.3967	55	1	1
1729	0	64		1	1	1	0	5.23	547.9	9.13167	0	1	0
1730	1	56		1	1	0	0	59.65	3143.8	52.3967	55	1	1
1731	0	50		2	1	0	0	59.46	3229	53.8167	5	1	0
1732	0	50		1	1	0	0	59.46	3229	53.8167	5	1	0
1733	0	49		2	1	1	0	8.83	735.7	12.2617	0	1	0
1734	0	37		2	1	1	0	16.37	1276.2	21.27	53	1	0
1735	0	65		2	1	1	0	920.28	39294.6	654.91	53	1	0
1736	0	65		1	1	1	0	920.28	39294.6	654.91	53	1	0
1737	1	64		2	1	0	0	21.93	1461.9	24.365	33	1	0
1738	1	67		2	1	0	0	40.77	3408.9	56.815	53	1	0
1739	1	56		1	1	0	0	23.89	1925	32.0833	36	1	0
1740	0	74		1	1	1	0	60.42	3080.5	51.3417	0	1	0
1741	1	67		1	1	0	0	40.77	3408.9	56.815	53	1	0
1742	0	72		2	1	1	0	1115.73	47103.6	785.06	0	1	0
1743	0	68		2	1	0	0	21.46	1651.5	27.525	14	1	1
1744	1	33		2	1	1	0	21.6	1464.4	24.4067	53	1	0
1745	0	72		1	1	1	0	1115.73	47103.6	785.06	0	1	0
1746	1	53		1	1	1	0	15.92	1261.5	21.025	33	1	0
1747	0	72		2	1	1	0	73.37	4170.6	69.51	53	1	0
1748	0	39		2	1	1	0	216.29	9986.5	166.442	36	1	0
1749	1	76		2	1	1	0	21.36	1424	23.7333	0	1	0
1750	0	40		2	1	1	1	51.07	2754.3	45.905	0	1	0
1751	1	59		1	1	0	0	51.26	2760.9	46.015	0	1	0
1752	1	59		1	1	1	0	5.23	547.9	9.13167	0	1	0
1753	0	76		2	1	1	0	8.63	759.5	12.6583	0	1	0
1754	0	76		1	1	1	0	8.63	759.5	12.6583	0	1	0
1755	0	60		2	1	1	1	48.75	2490.6	41.51	0	1	0
1756	1	54		2	1	1	1	8.52	717.9	11.965	0	1	0
1757	1	54		1	1	1	0	8.52	717.9	11.965	0	1	0
1758	1	61		2	1	1	0	59.46	3229	53.8167	0	1	0
1759	1	48		2	1	1	1	9.16	816.6	13.61	0	1	0
1760	1	48		1	1	1	0	9.16	816.6	13.61	0	1	0
1761	0	78		2	1	1	1	51.66	4229	70.4833	0	1	0
1762	0	78		1	1	1	0	51.66	4229	70.4833	0	1	0
1763	0	67		1	1	1	0	143.69	6256.4	104.273	0	1	0
1764	1	30		2	1	1	1	12.58	1074.9	17.915	0	1	0
1765	1	85		2	1	1	0	626.13	27959.2	465.987	0	1	0
1766	0	23		2	1	1	0	12.62	1177.6	19.6267	36	1	0
1767	0	39		2	1	1	0	10.37	905.8	15.0967	51	1	0
1768	0	39		1	1	1	0	10.37	905.8	15.0967	51	1	0
1769	0	52		2	1	1	0	27.97	2041.9	34.0317	0	1	0
1770	0	67		1	1	0	0	1137.24	48255	804.25	37	1	0
1771	0	67		2	1	0	0	1137.24	48255	804.25	37	1	0
1772	1	43		1	1	1	0	31.09	2571.2	42.8533	27	1	0
1773	0	40		2	1	1	0	23.37	1666.6	27.7767	0	1	0
1774	0	74		1	1	1	0	60.42	3080.5	51.3417	0	1	0
1775	1	36		2	1	1	0	9.23	781.2	13.02	61	1	1
1776	1	35		2	1	1	0	10.37	905.8	15.0967	51	1	0
1777	0	29		2	1	1	0	54.76	2910.6	48.51	51	1	0
1778	1	29		2	1	0	0	27.66	1691.9	28.1983	51	1	0
1779	1	29		1	1	0	0	27.66	1691.9	28.1983	51	1	0
1780	0	58		1	1	1	0	58.42	3086.6	51.4433	0	1	0
1781	1	61		1	1	0	0	58.14	3107.9	51.7983	55	1	0
1782	1	61		2	1	0	0	58.14	3107.9	51.7983	55	1	0
1783	0	65		1	1	1	0	5.23	547.9	9.13167	0	1	0
1784	0	81		2	1	1	0	7.16	715.7	11.9283	0	1	0
1785	1	87		1	1	1	0	5.23	547.9	9.13167	0	1	0
1786	0	24		1	1	1	0	28.97	2191.8	36.53	36	1	0
1787	0	56		1	1	1	0	9.16	816.6	13.61	36	1	0
1788	1	40		1	1	1	0	83.99	4168.9	69.4817	35	1	0
1789	0	54		1	1	0	0	3.57	329.2	5.48667	36	1	0
1790	1	62		1	1	1	0	21.6	1464.4	24.4067	89	1	0
1791	1	62		2	1	1	0	21.6	1464.4	24.4067	89	1	0
1792	0	31		1	1	1	1	18.07	1269.8	21.1633	0	1	0
1793	0	74		2	1	1	0	9.16	816.6	13.61	0	1	0
1794	0	47		2	1	1	1	6.85	663.7	11.0617	0	1	0
1795	1	47		1	1	1	0	6.85	663.7	11.0617	0	1	0
1796	0	43		1	1	1	0	16.5	1287.8	21.4633	0	1	0
1797	0	38		2	1	1	0	59.37	3165.5	52.7583	0	1	0
1798	0	38		1	1	1	1	59.37	3165.5	52.7583	0	1	0
1799	0	54		2	1	1	0	108.09	5055.7	84.2617	0	1	0
1800	0	54		1	1	1	0	108.09	5055.7	84.2617	0	1	0
1801	0	28		1	1	1	0	119.7	6087	101.45	0	1	0
1802	1	70		2	1	1	1	77.97	3998.1	66.635	0	1	0
1803	0	52		2	1	1	0	11.92	982.7	16.3783	0	1	0
1804	1	62		1	1	1	0	16.87	1147.6	19.1267	0	1	0
1805	0	65		1	1	1	0	131.97	6072.2	101.203	0	1	0
1806	1	72		2	1	1	0	32.18	2426.6	40.4433	52	1	1
1807	0	70		1	1	1	0	23.37	1666.6	27.7767	38	1	0
1808	0	70		2	1	1	0	23.37	1666.6	27.7767	37	1	0
1809	1	75		2	1	1	0	61.11	3235.8	53.93	0	1	0
1810	0	74		1	1	1	0	60.42	3080.5	51.3417	0	1	0
1811	0	64		2	1	1	0	56.42	2979.5	49.6583	0	1	0
1812	1	72		1	1	1	0	32.18	2426.6	40.4433	52	1	1
1813	1	42		1	1	1	0	45.1	2542.7	42.3783	0	1	0
1814	1	61		2	1	0	0	67.01	3320.8	55.3467	108	1	1
1815	1	61		1	1	0	0	67.01	3320.8	55.3467	108	1	1
1816	1	65		1	1	0	0	5.23	547.9	9.13167	45	1	0
1817	1	57		2	1	1	0	1206.29	55719.6	928.66	66	1	0
1818	1	77		2	1	1	0	28.97	2191.8	36.53	55	1	1
1819	0	59		2	1	1	0	51.66	4229	70.4833	52	1	0
1820	0	78		2	1	0	0	34.66	2236.6	37.2767	0	1	0
1821	0	59		1	1	1	0	51.66	4229	70.4833	52	1	0
1822	1	67		1	1	1	0	10.19	911.6	15.1933	0	1	0
1823	1	66		2	1	0	0	52.86	2869.9	47.8317	22	1	0
1824	1	66		1	1	0	0	52.86	2869.9	47.8317	22	1	0
1825	0	86		2	1	1	0	232.04	9854	164.233	0	1	0
1826	0	48		2	1	0	0	107.44	5427.2	90.4533	45	1	1
1827	1	46		2	1	1	0	224.02	9920.4	165.34	51	1	0
1828	0	48		1	1	0	0	107.44	5427.2	90.4533	45	1	1
1829	1	50		2	1	1	0	1216.38	56076.6	934.61	50	1	1
1830	0	86		2	1	1	0	232.04	9854	164.233	0	1	0
1831	0	49		2	1	1	1	58.73	3095.1	51.585	0	1	0
1832	1	80		1	1	1	0	1111.74	47610.4	793.507	0	1	0
1833	1	56		2	1	1	0	57.84	2979	49.65	0	1	0
1834	1	56		1	1	1	1	57.84	2979	49.65	0	1	0
1835	1	64		2	1	1	0	5.23	547.9	9.13167	36	1	0
1836	0	60		1	1	1	0	399.53	16977.8	282.963	0	1	0
1837	1	77		2	1	1	0	7.25	624.6	10.41	0	1	0
1838	1	44		2	1	1	0	16.46	1355.9	22.5983	53	1	0
1839	1	44		1	1	1	0	16.46	1355.9	22.5983	53	1	0
1840	0	70		2	1	0	0	123.33	5984.1	99.735	37	1	1
1841	0	70		1	1	0	0	123.33	5984.1	99.735	37	1	1
1842	0	37		1	1	1	0	111.8	5254	87.5667	10	1	1
1843	0	60		1	1	0	0	58.78	3166.8	52.78	39	1	1
1844	0	64		2	1	0	0	19.29	1821.6	30.36	51	1	0
1845	0	64		1	1	1	0	19.29	1821.6	30.36	0	1	0
1846	0	74		1	1	1	0	60.42	3080.5	51.3417	0	1	0
1847	1	55		1	1	1	0	19.02	1352.9	22.5483	38	1	1
1848	0	65		2	1	1	0	7.56	619.4	10.3233	0	1	0
1849	0	68		1	1	1	0	58.42	3086.6	51.4433	0	1	0
1850	1	62		2	1	1	0	12.34	1026.7	17.1117	0	1	0
1851	0	57		1	1	1	0	25.52	1555	25.9167	0	1	0
1852	0	18		1	1	1	0	22.62	1509.4	25.1567	73	1	0
1853	1	31		2	1	1	0	25.63	1918.5	31.975	49	1	0
1854	0	63		2	1	0	0	16.5	1287.8	21.4633	52	1	0
1855	1	49		2	1	1	0	22.26	1833.7	30.5617	37	1	1
1856	1	74		2	1	1	0	78.52	4168.4	69.4733	53	1	0
1857	0	77		2	1	1	0	7.25	624.6	10.41	0	1	0
1858	0	55		2	1	1	0	1032.37	40853.6	680.893	0	1	0
1859	1	76		2	1	1	0	21.36	1424	23.7333	0	1	0
1860	0	21		2	1	1	0	42.97	2903.5	48.3917	49	1	0
1861	0	74		2	1	1	0	26.16	1907.1	31.785	0	1	0
1862	1	62		2	1	1	0	12.49	1028.4	17.14	0	1	0
1863	1	55		2	1	1	0	7.25	624.6	10.41	0	1	0
1864	0	46		2	1	1	0	29.45	2129.4	35.49	0	1	0
1865	0	50		1	1	1	0	60.43	3203.2	53.3867	0	1	0
1866	1	56		1	1	1	1	28.38	1675.5	27.925	0	1	0
1867	1	29		2	1	1	0	20.35	1420.8	23.68	0	1	0
1868	1	29		1	1	1	0	20.35	1420.8	23.68	0	1	0
1869	1	57		1	1	1	1	51.66	4229	70.4833	0	1	0
1870	0	25		2	1	1	0	8.63	759.5	12.6583	0	1	0
1871	1	55		2	1	1	0	18.77	1541.2	25.6867	0	1	0
1872	1	68		2	1	1	1	17.76	1287.5	21.4583	0	1	0
1873	0	70		2	1	1	0	21.7	1826.4	30.44	0	1	0
1874	0	53		2	1	1	0	8.52	717.9	11.965	0	1	0
1875	0	53		1	1	1	0	8.52	717.9	11.965	0	1	0
1876	0	50		2	1	1	0	25.63	1918.5	31.975	0	1	0
1877	0	76		1	1	1	0	10.37	905.8	15.0967	0	1	0
1878	1	62		1	1	1	0	9.19	848.4	14.14	0	1	0
1879	1	62		2	1	1	0	9.19	848.4	14.14	0	1	0
1880	0	46		2	1	1	0	29.45	2129.4	35.49	0	1	0
1881	1	54		2	1	1	0	14.04	1198.7	19.9783	0	1	0
1882	1	54		2	1	0	0	24.12	1957.8	32.63	13	1	1
1883	0	65		1	1	0	0	56.13	2779.9	46.3317	13	1	0
1884	1	59		2	1	1	0	6.28	599	9.98333	0	1	0
1885	1	59		1	1	1	0	6.28	599	9.98333	0	1	0
1886	1	61		2	1	1	0	147.25	6508	108.467	115	1	1
1887	1	61		1	1	1	0	147.25	6508	108.467	115	1	1
1888	0	50		1	1	0	0	61.63	3222.2	53.7033	209	1	1
1889	1	51		2	1	1	0	19.38	1590.2	26.5033	34	1	0
1890	0	55		2	1	1	0	147.25	6508	108.467	115	1	1
1891	0	55		1	1	1	0	147.25	6508	108.467	115	1	1
1892	0	65		1	1	0	0	9.95	850.7	14.1783	0	1	0
1893	0	65		2	1	0	0	9.95	850.7	14.1783	0	1	0
1894	0	61		1	1	0	0	46.88	2845.5	47.425	119	1	0
1895	1	59		2	1	1	0	7.13	598.4	9.97333	0	1	0
1896	1	59		1	1	1	0	7.13	598.4	9.97333	0	1	0
1897	1	25		2	1	1	0	21.6	1464.4	24.4067	0	1	0
1898	0	39		2	1	1	0	10.19	911.6	15.1933	0	1	0
1899	1	75		2	1	1	0	19.52	1366.7	22.7783	0	1	0
1900	1	72		2	1	1	0	47.54	2891.8	48.1967	0	1	0
1901	1	72		2	1	1	0	31.34	2321.3	38.6883	70	1	0
1902	0	73		1	1	1	0	20.58	1471.9	24.5317	40	1	1
1903	0	72		2	1	0	0	535.05	23593.5	393.225	0	1	0
1904	1	46		2	1	0	0	43.74	2391.3	39.855	55	1	1
1905	0	43		1	1	0	0	35.61	2138.7	35.645	67	1	0
1906	0	68		2	1	1	0	177.6	7974	132.9	0	1	0
1907	0	21		1	1	1	1	10.37	905.8	15.0967	0	1	0
1908	1	43		2	1	1	0	10.19	911.6	15.1933	0	1	0
1909	1	46		1	1	0	0	43.74	2391.3	39.855	55	1	1
1910	0	71		1	1	1	0	23.89	1925	32.0833	0	1	0
1911	0	55		1	1	1	0	748.55	32269.9	537.832	0	1	0
1912	0	60		1	1	1	0	18.98	1341.6	22.36	0	1	0
1913	0	33		2	1	1	0	23.32	1891.7	31.5283	0	1	0
1914	1	45		1	1	1	1	8.48	769.6	12.8267	0	1	0
1915	0	47		2	1	1	1	34.87	2766.1	46.1017	25	1	0
1916	1	55		2	1	0	0	23.67	1803.6	30.06	49	1	0
1917	0	29		2	1	0	0	369.71	15398.4	256.64	50	1	0
1918	0	29		1	1	0	0	369.71	15398.4	256.64	50	1	0
1919	0	74		1	1	1	0	60.42	3080.5	51.3417	0	1	0
1920	1	69		1	1	0	0	10.08	902.7	15.045	42	1	1
1921	0	47		2	1	1	0	19.52	1366.7	22.7783	0	1	0
1922	1	28		1	1	1	0	88.07	4523.4	75.39	63	1	0
1923	1	57		2	1	1	0	95.96	5001.6	83.36	0	1	0
1924	0	47		1	1	1	0	19.52	1366.7	22.7783	0	1	0
1925	0	66		1	1	1	0	993.6	39800.3	663.338	6	1	0
1926	0	64		2	1	1	0	20.3	1422.3	23.705	0	1	0
1927	0	38		2	1	1	0	55.15	2898.4	48.3067	0	1	0
1928	1	27		2	1	0	0	17.72	1212.2	20.2033	50	1	0
1929	1	77		1	1	1	0	7.25	624.6	10.41	5	1	1
1930	0	19		2	1	1	0	51.07	2754.3	45.905	14	1	0
1931	0	53		2	1	1	0	9.41	816.7	13.6117	50	1	0
1932	1	61		1	1	0	0	107.41	5014.5	83.575	68	1	0
1933	0	19		1	1	1	0	51.07	2754.3	45.905	14	1	0
1934	1	54		1	1	1	0	831.26	32596.8	543.28	42	1	0
1935	1	69		2	1	1	0	16.39	1330	22.1667	0	1	0
1936	0	32		2	1	1	0	905.12	39440.8	657.347	0	1	0
1937	1	55		1	1	0	0	14.04	1198.7	19.9783	0	1	0
1938	1	54		1	1	1	0	24.88	1875	31.25	43	1	1
1939	0	56		1	1	1	0	57.59	3082.8	51.38	51	1	1
1940	0	56		2	1	1	0	57.59	3082.8	51.38	51	1	1
1941	0	59		2	1	1	0	302.77	15032.1	250.535	0	1	0
1942	0	34		1	1	1	0	23.37	1666.6	27.7767	0	1	0
1943	0	66		1	1	0	0	8.83	735.7	12.2617	0	1	0
1944	1	36		2	1	1	0	45	2506.1	41.7683	28	1	1
1945	0	56		2	1	1	1	13	1084	18.0667	0	1	0
1946	1	65		2	1	1	0	23.14	1553	25.8833	0	1	0
1947	1	55		2	1	1	0	8.97	825.5	13.7583	0	1	0
1948	1	65		2	1	0	0	12.62	1177.6	19.6267	11	1	0
1949	0	46		2	1	1	0	5.89	548.6	9.14333	0	1	0
1950	1	39		1	1	1	0	16.87	1147.6	19.1267	0	1	0
1951	0	57		1	1	1	0	83.99	4168.9	69.4817	0	1	0
1952	1	68		2	1	1	0	58.73	3095.1	51.585	0	1	0
1953	1	36		1	1	1	0	17.72	1212.2	20.2033	0	1	0
1954	0	37		1	1	1	0	17.76	1287.5	21.4583	0	1	0
1955	0	53		2	1	1	0	111.01	5188.7	86.4783	0	1	0
1956	0	61		1	1	1	0	25.63	1918.5	31.975	0	1	0
1957	0	46		2	1	1	0	47.54	2891.8	48.1967	0	1	0
1958	0	63		1	1	1	0	55.15	2898.4	48.3067	0	1	0
1959	0	54		2	1	1	0	86.12	4407.6	73.46	0	1	0
1960	0	76		2	1	1	0	35.88	2902.6	48.3767	0	1	0
1961	1	60		2	1	1	0	84.34	4310.5	71.8417	0	1	0
1962	0	49		1	1	1	0	16.5	1287.8	21.4633	0	1	0
1963	1	74		2	1	1	0	8.97	825.5	13.7583	0	1	0
1964	1	79		2	1	1	0	8.83	735.7	12.2617	0	1	0
1965	1	61		1	1	1	0	7.56	619.4	10.3233	0	1	0
1966	1	49		2	1	1	0	12.49	1028.4	17.14	0	1	0
1967	0	34		2	1	1	0	19.85	1356	22.6	0	1	0
1968	1	81		2	1	1	0	8.97	825.5	13.7583	0	1	0
1969	0	63		2	1	0	0	9.01	870.8	14.5133	0	1	0
1970	1	81		2	1	0	0	107.44	5427.2	90.4533	0	1	0
1971	1	63		2	1	1	0	12.64	1114.3	18.5717	0	1	0
1972	1	36		1	1	1	0	17.76	1287.5	21.4583	0	1	0
1973	0	82		2	1	0	0	11.08	1005	16.75	0	1	0
1974	0	78		2	1	1	0	8.83	735.7	12.2617	0	1	0
1975	1	57		1	1	1	0	242.53	10674	177.9	0	1	0
1976	1	84		1	1	0	0	32.18	2426.6	40.4433	4	1	0
1977	1	57		2	1	1	0	242.53	10674	177.9	0	1	0
1978	0	26		2	1	1	0	21.6	1464.4	24.4067	0	1	0
1979	1	66		2	1	1	0	21.52	1759.8	29.33	0	1	0
1980	1	29		2	1	1	0	8.06	823.5	13.725	0	1	0
1981	1	70		2	1	1	0	22.04	1418.3	23.6383	0	1	0
1982	0	65		2	1	1	0	920.28	39294.6	654.91	14	1	1
1983	1	81		2	1	1	0	28.58	1942.4	32.3733	0	1	0
1984	0	65		2	1	1	0	18.2	1304.1	21.735	0	1	0
1985	1	91		2	1	1	0	51.66	4229	70.4833	0	1	0
1986	0	29		1	1	1	0	82.09	4506.4	75.1067	0	1	0
1987	0	82		2	1	0	0	59.67	3190.8	53.18	0	1	0
1988	1	69		2	1	1	0	16.39	1330	22.1667	0	1	0
1989	1	70		2	1	1	0	51.07	2754.3	45.905	0	1	0
1990	0	52		2	1	0	0	74.39	3765.5	62.7583	1	1	1
1991	1	21		2	1	0	0	21.36	1424	23.7333	0	1	0
1992	0	67		2	1	0	0	34.66	2236.6	37.2767	0	1	0
1993	1	24		2	1	1	0	61.25	3306.4	55.1067	0	1	0
1994	1	92		2	1	1	0	21.46	1651.5	27.525	0	1	0
1995	1	29		2	1	1	0	107.44	5427.2	90.4533	0	1	0
1996	0	64		1	1	0	0	161.53	7464.1	124.402	0	1	0
1997	0	64		2	1	0	0	161.53	7464.1	124.402	0	1	0
1998	0	68		2	1	1	0	235.07	10954.2	182.57	0	1	0
1999	1	24		1	1	1	0	61.25	3306.4	55.1067	0	1	0
[truncated: 1,085 more rows]
