# Supplementary material for: Factors associated with non-attendance at appointments in the gastroenterology endoscopy unit: a retrospective cohort study
Source: PeerJ. 2022 Jul 25;10:e13518. doi: 10.7717/peerj.13518 (PMC9332409; doi:10.7717/peerj.13518)
Supplement: Supplemental Information 2 — Variables associated with non-adherence to endoscopy appointments during the COVID-19 prepandemic era. [file peerj-10-13518-s002.xlsx]

## Sheet: Sayfa1
patient number	Sex	Age	marital status	Intervention	Apointment ourcome	referring source	Anesthesia	GEO DİSTANCE	TRAVEL TİME(s)	TRAVEL TİME(min)	LEAD TİME	Season of ref.	malignancey
1	1	81	0	2	1	1	0	11.79	1053.4	17.5567	0	4	0
2	1	81	0	1	1	1	0	11.79	1053.4	17.5567	0	4	0
3	1	81	0	2	1	1	0	11.79	1053.4	17.5567	0	4	0
4	0	35	1	6	1	1	1	10.86	822	13.7	0	4	0
5	0	38	1	3	1	1	0	77.97	3998.1	66.635	0	4	0
6	0	38	1	2	1	1	0	77.97	3998.1	66.635	0	4	0
7	0	28	0	3	1	1	0	202.86	9067.7	151.128	0	4	0
8	1	62	1	2	1	1	0	5.89	548.6	9.14333	0	4	0
9	1	62	1	1	1	1	0	5.89	548.6	9.14333	0	4	0
10	1	35	1	2	1	1	0	12.65	1096.1	18.2683	0	4	0
11	1	35	1	3	1	1	0	12.65	1096.1	18.2683	0	4	0
12	1	53	1	7	1	1	0	51.26	2760.9	46.015	0	4	0
13	1	77	0	4	1	0	0	11.97	998.4	16.64	0	4	0
14	1	67	0	2	1	0	0	16.87	1379.7	22.995	0	4	0
15	1	98	0	2	1	1	0	8.12	715	11.9167	0	4	0
16	1	71	1	3	1	1	0	1002.81	42895.3	714.922	0	4	0
17	1	71	0	1	1	0	0	22.42	2103.9	35.065	0	4	0
18	1	71	0	2	1	0	0	22.42	2103.9	35.065	0	4	0
19	0	53	1	4	1	1	0	76.61	3762.6	62.71	0	4	0
20	0	53	1	4	1	1	0	76.61	3762.6	62.71	0	4	0
21	0	53	1	2	1	1	0	76.61	3762.6	62.71	0	4	0
22	0	53	1	4	1	1	0	76.61	3762.6	62.71	0	4	0
23	0	53	1	2	1	1	0	76.61	3762.6	62.71	0	4	0
24	1	89	0	2	1	0	0	10.97	920.5	15.3417	0	4	0
25	1	89	0	1	1	0	0	10.97	920.5	15.3417	0	4	0
26	0	38	1	2	1	1	0	45.07	2541	42.35	0	4	0
27	0	27	1	4	1	0	0	20.35	1420.8	23.68	0	4	0
28	0	27	1	4	1	0	0	20.35	1420.8	23.68	0	4	0
29	0	27	1	4	1	0	0	20.35	1420.8	23.68	0	4	0
30	0	70	1	1	1	0	0	556.55	25045.2	417.42	0	4	0
31	0	70	1	2	1	0	0	556.55	25045.2	417.42	0	4	0
32	0	52	1	2	1	1	0	10.37	905.8	15.0967	0	4	0
33	0	52	1	1	1	1	0	10.37	905.8	15.0967	0	4	0
34	0	62	1	5	1	1	1	62.87	3439.8	57.33	0	4	0
35	0	69	1	2	1	1	0	8.83	735.7	12.2617	0	4	0
36	0	69	1	2	1	1	0	8.83	735.7	12.2617	0	4	0
37	0	69	1	2	1	1	0	8.83	735.7	12.2617	0	4	0
38	1	37	1	3	1	1	0	51.66	4229	70.4833	0	4	0
39	1	51	1	1	1	1	1	60.59	3091.5	51.525	0	4	0
40	0	71	1	2	1	1	0	21.46	1651.5	27.525	0	4	0
41	0	71	1	1	1	1	0	21.46	1651.5	27.525	0	4	0
42	0	56	1	3	1	0	0	18.17	1465.8	24.43	4	4	0
43	0	73	1	2	1	1	0	760.81	32528.9	542.148	0	4	0
44	0	73	1	1	1	1	0	760.81	32528.9	542.148	0	4	0
45	0	77	1	2	1	1	0	10.19	911.6	15.1933	0	4	0
46	0	77	1	1	1	1	0	10.19	911.6	15.1933	0	4	0
47	0	63	1	2	1	1	0	935.52	38438.7	640.645	0	4	0
48	0	63	1	1	1	1	0	935.52	38438.7	640.645	0	4	0
49	1	47	1	5	1	1	1	191.65	9418.9	156.982	0	4	0
50	1	51	1	7	1	1	0	22.9	1847.1	30.785	0	4	0
51	1	57	0	2	1	1	0	113.27	5534.2	92.2367	0	4	0
52	1	57	0	2	1	1	0	113.27	5534.2	92.2367	0	4	0
53	1	57	0	1	1	1	0	113.27	5534.2	92.2367	0	4	0
54	0	71	1	2	1	1	0	34.09	1926	32.1	0	4	0
55	0	71	1	4	1	1	0	34.09	1926	32.1	0	4	0
56	0	56	1	4	1	1	0	82.09	4506.4	75.1067	0	4	0
57	0	56	1	2	1	1	0	82.09	4506.4	75.1067	0	4	0
58	0	56	1	4	1	1	0	82.09	4506.4	75.1067	0	4	0
59	0	63	1	2	1	1	0	32.18	2426.6	40.4433	0	4	0
60	0	63	1	1	1	1	0	32.18	2426.6	40.4433	0	4	0
61	1	79	0	5	1	1	1	34.87	2766.1	46.1017	1	4	0
62	1	43	1	2	1	1	0	11.97	998.4	16.64	0	4	0
63	1	43	1	3	1	1	0	9.16	816.6	13.61	0	4	0
64	1	43	1	2	1	1	0	9.16	816.6	13.61	0	4	0
65	0	57	1	4	1	1	0	30.24	2244.6	37.41	0	4	0
66	0	57	1	4	1	1	0	30.24	2244.6	37.41	0	4	0
67	1	82	0	4	1	1	0	10.19	911.6	15.1933	3	4	0
68	1	82	0	4	1	1	0	10.19	911.6	15.1933	0	4	0
69	0	35	1	4	1	1	0	59.18	3287.8	54.7967	0	4	0
70	0	35	1	4	1	1	0	59.18	3287.8	54.7967	0	4	0
71	0	35	1	4	1	1	0	59.18	3287.8	54.7967	0	4	0
72	0	35	1	2	1	1	0	59.18	3287.8	54.7967	0	4	0
73	0	44	1	4	1	1	0	42.97	2903.5	48.3917	0	4	0
74	0	44	1	4	1	1	0	42.97	2903.5	48.3917	0	4	0
75	0	44	1	4	1	1	0	42.97	2903.5	48.3917	0	4	0
76	0	44	1	4	1	1	0	42.97	2903.5	48.3917	0	4	0
77	0	44	1	4	1	1	0	42.97	2903.5	48.3917	0	4	0
78	0	73	0	1	1	0	0	23.14	1553	25.8833	0	4	0
79	0	73	0	2	1	0	0	23.14	1553	25.8833	0	4	0
80	0	71	1	1	1	1	0	8.52	717.9	11.965	0	4	0
81	1	74	0	1	1	1	0	103.71	5156.4	85.94	0	4	0
82	1	68	0	2	1	1	0	9.95	850.7	14.1783	0	4	0
83	1	68	0	2	1	1	0	9.95	850.7	14.1783	0	4	0
84	1	59	1	1	1	1	0	90.05	4522.8	75.38	0	4	0
85	1	59	1	2	1	1	0	90.05	4522.8	75.38	0	4	0
86	0	34	1	3	1	1	0	25.82	1591.5	26.525	0	4	0
87	0	34	1	2	1	1	0	25.82	1591.5	26.525	0	4	0
88	1	65	1	1	1	1	0	86.04	4195.8	69.93	0	4	0
89	1	65	1	2	1	1	0	86.04	4195.8	69.93	0	4	0
90	1	53	1	2	1	1	0	29.45	2129.4	35.49	0	4	0
91	1	53	1	1	1	1	0	29.45	2129.4	35.49	0	4	0
92	0	52	1	1	1	1	0	84.34	4310.5	71.8417	0	4	0
93	1	70	1	2	1	0	0	18.17	1465.8	24.43	0	4	0
94	1	70	1	1	1	0	0	18.17	1465.8	24.43	0	4	0
95	0	71	1	2	1	1	0	72.09	3631.6	60.5267	0	4	0
96	0	71	1	1	1	1	0	72.09	3631.6	60.5267	0	4	0
97	0	79	1	2	1	1	0	12.34	1026.7	17.1117	0	4	0
98	0	53	1	2	1	1	0	15.92	1261.5	21.025	0	4	0
99	0	53	1	1	1	1	0	15.92	1261.5	21.025	0	4	0
100	0	67	1	5	1	0	0	19.85	1356	22.6	0	4	0
101	0	27	1	7	1	0	0	58.42	3086.6	51.4433	1	4	0
102	1	53	1	2	1	1	0	80.4	4074.6	67.91	0	4	0
103	1	53	1	1	1	1	0	80.4	4074.6	67.91	0	4	0
104	0	75	1	2	1	1	0	23.32	1891.7	31.5283	0	4	0
105	0	75	1	2	1	1	0	23.32	1891.7	31.5283	0	4	0
106	0	64	1	7	1	1	0	30.24	2244.6	37.41	1	4	0
107	0	47	1	4	1	1	0	80.32	4027.4	67.1233	0	4	0
108	0	47	1	6	1	1	1	80.32	4027.4	67.1233	0	4	0
109	0	47	1	4	1	1	0	80.32	4027.4	67.1233	0	4	0
110	1	79	0	1	1	0	0	26.43	1944.1	32.4017	0	4	0
111	1	79	0	2	1	0	0	26.43	1944.1	32.4017	0	4	0
112	0	71	1	1	1	1	0	8.52	717.9	11.965	0	4	0
113	0	71	1	2	1	1	0	8.52	717.9	11.965	0	4	0
114	0	55	1	1	1	1	0	59.65	3143.8	52.3967	0	4	0
115	0	55	1	2	1	1	0	59.65	3143.8	52.3967	0	4	0
116	1	76	1	1	1	1	0	29.45	2129.4	35.49	0	4	0
117	1	76	1	2	1	1	0	29.45	2129.4	35.49	0	4	0
118	1	68	1	2	1	1	0	19.52	1366.7	22.7783	0	4	0
119	1	67	1	1	1	1	0	10.08	902.7	15.045	0	4	0
120	0	68	1	3	1	1	0	8.12	715	11.9167	0	4	0
121	0	61	1	3	1	1	0	10.08	902.7	15.045	0	4	0
122	1	67	1	2	1	1	0	10.08	902.7	15.045	0	4	0
123	1	46	0	2	1	1	0	17.76	1287.5	21.4583	0	4	0
124	0	52	1	3	1	0	0	19.38	1590.2	26.5033	0	4	0
125	0	62	1	4	1	1	0	575.32	24726.9	412.115	0	4	0
126	1	27	0	4	1	1	0	457.53	18047	300.783	0	4	0
127	1	82	0	4	1	1	0	253.21	10917.1	181.952	0	4	0
128	0	72	1	4	1	0	0	20.66	1765.6	29.4267	0	4	0
129	1	52	1	4	1	0	0	23.94	1825.4	30.4233	0	4	0
130	1	66	1	4	1	0	0	4.84	443.6	7.39333	0	4	0
131	0	50	1	4	1	1	0	19.52	1366.7	22.7783	0	4	0
132	0	57	1	4	1	1	1	30.24	2244.6	37.41	4	4	0
133	0	34	0	1	1	1	0	23.37	1554.4	25.9067	0	4	0
134	0	34	0	2	1	1	0	23.37	1554.4	25.9067	0	4	0
135	1	53	0	3	1	1	0	8.63	759.5	12.6583	0	4	0
136	1	53	0	5	1	1	0	8.63	759.5	12.6583	0	4	0
137	0	67	1	1	1	1	0	19.52	1366.7	22.7783	0	4	0
138	1	74	1	1	1	1	0	42.97	2903.5	48.3917	0	4	0
139	1	74	1	2	1	1	0	42.97	2903.5	48.3917	0	4	0
140	1	27	0	4	1	1	0	457.53	18047	300.783	3	4	0
141	1	27	0	4	1	1	0	457.53	18047	300.783	3	4	0
142	1	27	0	4	1	1	0	457.53	18047	300.783	3	4	0
143	1	27	0	4	1	1	0	457.53	18047	300.783	3	4	0
144	1	65	0	5	1	1	0	868.26	35462	591.033	0	4	0
145	0	62	1	4	1	1	1	23.14	1553	25.8833	0	4	0
146	0	62	1	4	1	1	0	23.14	1553	25.8833	0	4	0
147	0	62	1	2	1	1	0	23.14	1553	25.8833	0	4	0
148	0	62	1	4	1	1	0	23.14	1553	25.8833	0	4	0
149	0	62	1	2	1	1	0	23.14	1553	25.8833	0	4	0
150	0	61	1	2	1	1	0	35.88	2902.6	48.3767	0	4	0
151	0	61	1	1	1	1	0	35.88	2902.6	48.3767	0	4	0
152	1	67	1	2	1	1	0	12.49	995.2	16.5867	0	4	0
153	0	62	1	2	1	1	0	575.32	24726.9	412.115	0	4	0
154	0	62	1	4	1	1	0	575.32	24726.9	412.115	0	4	0
155	0	77	1	1	1	1	0	8.82	779.4	12.99	0	4	0
156	0	77	1	2	1	1	0	8.82	779.4	12.99	0	4	0
157	0	29	1	7	1	1	0	9.41	816.7	13.6117	0	4	0
158	1	76	0	2	1	1	0	32.18	2426.6	40.4433	0	4	0
159	1	76	0	2	1	1	0	32.18	2426.6	40.4433	0	4	0
160	1	76	0	1	1	1	0	32.18	2426.6	40.4433	0	4	0
161	0	82	1	1	1	1	0	59.65	3143.8	52.3967	0	4	0
162	0	82	1	2	1	1	0	59.65	3143.8	52.3967	0	4	0
163	1	67	1	1	1	1	0	12.49	995.2	16.5867	0	4	0
164	1	67	1	2	1	1	0	12.49	995.2	16.5867	0	4	0
165	1	63	0	2	1	1	0	23.67	1803.6	30.06	0	4	0
166	1	63	0	1	1	1	0	23.67	1803.6	30.06	0	4	0
167	0	65	1	1	1	1	0	1222.08	50715.2	845.253	0	4	0
168	0	79	1	2	1	1	0	11.08	1005	16.75	0	4	0
169	1	64	1	4	1	1	0	1431.35	63906.9	1065.12	4	4	1
170	1	64	1	4	1	1	0	1431.35	63906.9	1065.12	0	4	0
171	1	64	1	4	1	1	0	1431.35	63906.9	1065.12	0	4	0
172	1	64	1	2	1	1	0	1431.35	63906.9	1065.12	0	4	0
173	0	43	1	4	1	1	0	115.32	5272.3	87.8717	0	4	0
174	0	43	1	4	1	1	0	115.32	5272.3	87.8717	0	4	0
175	0	43	1	4	1	1	0	115.32	5272.3	87.8717	0	4	0
176	0	62	1	1	1	1	0	16.5	1287.8	21.4633	0	4	0
177	0	35	1	2	1	1	0	59.18	3287.8	54.7967	0	4	0
178	0	38	1	2	1	1	0	45.07	2541	42.35	0	4	0
179	1	63	0	7	1	1	0	58.61	3110.1	51.835	7	4	0
180	0	39	1	5	1	1	1	11.39	1003.5	16.725	0	4	0
181	0	39	1	5	1	1	0	11.39	1003.5	16.725	13	4	1
182	0	45	1	7	1	1	0	18.46	1477.9	24.6317	0	4	0
183	0	46	1	2	1	1	0	9.44	849.2	14.1533	0	4	0
184	0	46	1	2	1	1	0	9.44	849.2	14.1533	0	4	0
185	1	39	0	1	1	1	0	22.04	1418.3	23.6383	0	4	0
186	1	39	1	2	1	1	0	51.66	4229	70.4833	0	4	0
187	1	39	1	2	1	1	0	51.66	4229	70.4833	0	4	0
188	1	36	1	1	1	1	0	23.14	1553	25.8833	0	4	0
189	1	64	1	4	1	1	0	1431.35	63906.9	1065.12	0	4	0
190	1	64	1	4	1	1	0	1431.35	63906.9	1065.12	0	4	0
191	1	64	1	2	1	1	0	1431.35	63906.9	1065.12	0	4	0
192	1	64	1	4	1	1	0	1431.35	63906.9	1065.12	0	4	0
193	1	65	1	1	1	1	1	10.97	920.5	15.3417	0	4	0
194	1	52	1	5	1	1	1	86.18	4298.9	71.6483	13	4	1
195	1	52	1	5	1	1	1	86.18	4298.9	71.6483	0	4	0
196	0	84	1	4	1	0	0	9.16	816.6	13.61	0	4	0
197	1	54	1	4	1	0	0	95.38	4813.6	80.2267	0	4	0
198	1	73	0	4	1	0	0	25.21	1668.1	27.8017	0	4	1
199	0	63	1	1	1	1	0	73.4	3654.5	60.9083	0	4	0
200	0	63	1	2	1	1	0	73.4	3654.5	60.9083	0	4	0
201	0	63	1	2	1	1	0	73.4	3654.5	60.9083	0	4	0
202	0	69	1	5	1	1	1	51.66	4229	70.4833	0	4	0
203	0	69	1	5	1	1	0	51.66	4229	70.4833	0	4	0
204	0	53	1	1	1	1	0	60.74	4285.3	71.4217	0	4	0
205	0	25	0	1	1	1	0	67.53	3399.1	56.6517	0	4	0
206	1	46	1	1	1	1	0	105.56	4962.6	82.71	0	4	0
207	1	46	1	2	1	1	0	105.56	4962.6	82.71	0	4	0
208	1	80	0	4	1	1	0	817.86	36353.8	605.897	0	4	0
209	1	80	0	4	1	1	0	817.86	36353.8	605.897	0	4	0
210	1	80	0	4	1	1	0	817.86	36353.8	605.897	0	4	0
211	1	77	0	2	1	1	0	9.95	850.7	14.1783	0	4	0
212	1	77	0	2	1	1	0	9.95	850.7	14.1783	0	4	0
213	0	30	1	1	1	1	0	65.63	3638.4	60.64	0	4	0
214	0	51	1	1	1	0	0	60.99	3186.2	53.1033	0	4	0
215	1	60	1	2	1	0	0	11.08	1005	16.75	0	4	0
216	1	60	1	2	1	0	0	11.08	1005	16.75	0	4	0
217	1	60	1	2	1	0	0	11.08	1005	16.75	0	4	0
218	1	68	1	1	1	1	0	357.94	14871.9	247.865	0	4	0
219	0	63	1	2	1	1	0	29.93	1926.3	32.105	0	4	0
220	0	63	1	1	1	1	0	29.93	1926.3	32.105	0	4	0
221	0	54	1	2	1	1	0	123.46	5714.8	95.2467	0	4	0
222	0	54	1	1	1	1	0	123.46	5714.8	95.2467	0	4	0
223	0	54	1	2	1	1	0	123.46	5714.8	95.2467	0	4	0
224	1	44	1	3	1	1	0	22.62	1509.4	25.1567	3	4	0
225	0	63	1	3	1	1	0	11.08	1005	16.75	0	4	0
226	1	77	1	1	1	1	0	60.59	3091.5	51.525	0	4	0
227	1	77	1	2	1	1	0	60.59	3091.5	51.525	0	4	0
228	0	80	0	2	1	1	0	42.97	2903.5	48.3917	0	4	0
229	0	80	0	2	1	1	0	42.97	2903.5	48.3917	0	4	0
230	0	77	1	1	1	0	0	623.01	25932.9	432.215	0	4	0
231	1	66	0	2	1	1	0	23.67	1803.6	30.06	0	4	0
232	0	78	1	4	1	1	0	74.39	3765.5	62.7583	7	4	0
233	0	78	1	2	1	1	0	74.39	3765.5	62.7583	0	4	0
234	0	78	1	4	1	1	0	74.39	3765.5	62.7583	0	4	0
235	0	78	1	4	1	1	0	74.39	3765.5	62.7583	0	4	0
236	0	78	1	2	1	1	0	74.39	3765.5	62.7583	0	4	0
237	0	78	1	2	1	1	0	74.39	3765.5	62.7583	0	4	0
238	1	71	0	4	1	1	0	22.68	1716.4	28.6067	0	4	0
239	1	71	0	4	1	1	0	22.68	1716.4	28.6067	0	4	0
240	1	71	0	2	1	1	0	22.68	1716.4	28.6067	0	4	0
241	1	71	0	4	1	1	0	22.68	1716.4	28.6067	0	4	0
242	0	80	1	2	1	1	0	560.32	22385	373.083	0	4	0
243	0	80	1	2	1	1	0	560.32	22385	373.083	0	4	0
244	1	66	1	2	1	1	0	1261.27	55401.3	923.355	0	4	0
245	1	66	1	1	1	1	0	1261.27	55401.3	923.355	0	4	0
246	1	62	1	2	1	1	0	499.87	24036.3	400.605	0	4	0
247	1	62	1	1	1	1	0	499.87	24036.3	400.605	0	4	0
248	1	62	1	2	1	1	0	499.87	24036.3	400.605	0	4	0
249	0	57	1	1	1	1	0	71.17	3725.9	62.0983	0	4	0
250	0	57	1	2	1	1	0	71.17	3725.9	62.0983	0	4	0
251	0	63	1	2	1	1	0	418.47	17711.8	295.197	0	4	0
252	0	63	1	1	1	1	0	418.47	17711.8	295.197	0	4	0
253	0	74	1	2	1	1	0	51.66	4229	70.4833	0	4	0
254	0	74	1	1	1	1	0	51.66	4229	70.4833	0	4	0
255	0	63	1	1	1	1	0	14.28	1369	22.8167	0	4	0
256	1	50	1	1	1	1	0	52.86	2869.9	47.8317	0	4	0
257	0	63	1	2	1	1	0	14.28	1369	22.8167	0	4	0
258	1	50	1	2	1	1	0	52.86	2869.9	47.8317	0	4	0
259	0	63	1	2	1	1	0	14.28	1369	22.8167	0	4	0
260	1	55	1	4	1	1	0	38.11	3243.7	54.0617	0	4	0
261	0	79	1	3	1	1	0	51.07	2754.3	45.905	0	4	0
262	0	54	1	2	1	1	0	63.7	3167.5	52.7917	0	4	0
263	0	76	1	2	1	0	0	22.6	1645	27.4167	0	4	0
264	0	54	1	5	1	1	0	83.99	4168.9	69.4817	0	4	0
265	0	63	1	1	1	1	0	14.28	1369	22.8167	0	4	0
266	0	63	1	2	1	1	0	14.28	1369	22.8167	0	4	0
267	0	49	1	1	1	1	0	16.08	1370.4	22.84	0	4	0
268	0	49	1	2	1	1	0	16.08	1370.4	22.84	0	4	0
269	0	25	0	1	1	1	0	7.44	629.1	10.485	0	4	0
270	1	80	0	4	1	1	0	817.86	36353.8	605.897	0	4	0
271	1	80	0	4	1	1	0	817.86	36353.8	605.897	0	4	0
272	1	80	0	4	1	1	0	817.86	36353.8	605.897	0	4	0
273	0	79	0	4	1	1	0	354.2	14514	241.9	0	4	0
274	0	79	0	4	1	1	0	354.2	14514	241.9	0	4	0
275	0	79	0	2	1	1	0	354.2	14514	241.9	0	4	0
276	0	79	0	4	1	1	0	354.2	14514	241.9	0	4	0
277	1	48	0	3	1	1	0	16.5	1287.8	21.4633	5	4	0
278	0	53	1	1	1	1	0	143.97	6263.8	104.397	0	4	0
279	0	53	1	2	1	1	0	143.97	6263.8	104.397	0	4	0
280	0	53	1	2	1	1	0	143.97	6263.8	104.397	0	4	0
281	0	53	1	2	1	1	0	143.97	6263.8	104.397	0	4	0
282	0	60	1	1	1	0	0	73.37	4170.6	69.51	0	4	0
283	0	51	1	2	1	1	0	643.64	27834.2	463.903	0	4	0
284	0	51	1	1	1	1	0	643.64	27834.2	463.903	0	4	0
285	0	64	1	4	1	0	0	284.64	11984.7	199.745	0	4	0
286	1	54	1	4	1	0	0	561.78	25480.6	424.677	0	4	0
287	0	69	1	2	1	1	0	12.36	1014	16.9	0	4	0
288	0	69	1	1	1	1	0	12.36	1014	16.9	0	4	0
289	0	34	1	2	1	1	0	174.53	7642.1	127.368	0	4	0
290	1	43	1	3	1	1	0	21.46	1651.5	27.525	6	4	0
291	1	62	1	3	1	1	0	1194.05	55753.6	929.227	6	4	0
292	0	64	1	4	1	1	1	27.97	2041.9	34.0317	0	4	0
293	0	66	1	4	1	1	0	51.66	4229	70.4833	13	4	0
294	0	66	1	4	1	1	0	51.66	4229	70.4833	0	4	0
295	0	66	1	2	1	1	0	51.66	4229	70.4833	0	4	0
296	0	66	1	4	1	1	0	51.66	4229	70.4833	0	4	0
297	1	60	0	2	1	1	0	51.66	4229	70.4833	0	4	0
298	1	60	0	2	1	1	0	51.66	4229	70.4833	0	4	0
299	1	61	1	2	1	1	0	51.66	4229	70.4833	0	4	0
300	1	61	1	2	1	1	0	51.66	4229	70.4833	0	4	0
301	1	61	1	5	1	1	0	51.66	4229	70.4833	0	4	0
302	1	25	1	4	1	1	0	161.53	7464.1	124.402	0	4	0
303	1	25	1	4	1	1	0	161.53	7464.1	124.402	0	4	0
304	1	25	1	2	1	1	0	161.53	7464.1	124.402	0	4	0
305	1	25	1	2	1	1	0	161.53	7464.1	124.402	0	4	0
306	1	66	1	4	1	1	0	50.88	2681.2	44.6867	0	4	0
307	1	62	1	4	1	1	0	12.59	1041.7	17.3617	6	4	0
308	1	62	1	4	1	1	0	12.59	1041.7	17.3617	6	4	0
309	1	62	1	4	1	1	0	12.59	1041.7	17.3617	6	4	0
310	1	62	1	4	1	1	0	12.59	1041.7	17.3617	6	4	0
311	1	62	1	2	1	1	0	12.59	1041.7	17.3617	0	4	0
312	1	54	0	2	1	1	0	21.6	1464.4	24.4067	0	4	0
313	1	35	1	3	1	1	0	5.23	547.9	9.13167	0	4	0
314	0	68	1	1	1	1	0	16.08	1370.4	22.84	0	4	0
315	0	66	1	1	1	1	0	32.56	2551.6	42.5267	0	4	0
316	0	66	1	2	1	1	0	32.56	2551.6	42.5267	0	4	0
317	0	39	0	2	1	1	0	23.37	1554.4	25.9067	0	4	0
318	0	39	0	1	1	1	0	23.37	1554.4	25.9067	0	4	0
319	0	39	0	2	1	1	0	23.37	1554.4	25.9067	0	4	0
320	0	79	0	4	1	1	0	354.2	14514	241.9	0	4	0
321	0	79	0	4	1	1	0	354.2	14514	241.9	0	4	0
322	0	79	0	2	1	1	0	354.2	14514	241.9	0	4	0
323	0	79	0	4	1	1	0	354.2	14514	241.9	0	4	0
324	0	79	0	2	1	1	0	354.2	14514	241.9	0	4	0
325	1	56	0	1	1	1	0	24.01	1537.1	25.6183	0	4	0
326	0	69	1	4	1	1	0	42.97	2903.5	48.3917	0	4	0
327	0	69	1	4	1	0	0	42.97	2903.5	48.3917	0	4	0
328	0	69	1	4	1	0	0	42.97	2903.5	48.3917	0	4	0
329	0	37	1	4	1	0	0	34.66	2236.6	37.2767	0	4	0
330	0	37	1	4	1	0	0	34.66	2236.6	37.2767	0	4	0
331	0	37	1	4	1	0	0	34.66	2236.6	37.2767	0	4	0
332	0	37	1	2	1	0	0	34.66	2236.6	37.2767	0	4	0
333	0	65	1	2	1	1	0	9.41	816.7	13.6117	0	4	0
334	0	65	1	1	1	1	0	9.41	816.7	13.6117	0	4	0
335	0	68	1	1	1	1	0	74.39	3765.5	62.7583	0	4	0
336	0	60	1	3	1	1	0	16.87	1379.7	22.995	0	4	0
337	1	60	1	3	1	1	0	13.39	1340.9	22.3483	0	4	0
338	0	53	1	7	1	1	0	39.1	2541.7	42.3617	5	4	0
339	1	71	0	2	1	1	0	22.68	1716.4	28.6067	0	4	0
340	0	49	1	2	1	1	0	18.46	1477.9	24.6317	0	4	0
341	0	51	1	1	1	1	0	10.37	905.8	15.0967	0	4	0
342	0	51	1	2	1	1	0	10.37	905.8	15.0967	0	4	0
343	0	51	1	2	1	1	0	10.37	905.8	15.0967	0	4	0
344	1	90	0	4	1	0	0	965.48	41572	692.867	0	4	0
345	1	90	0	4	1	0	0	965.48	41572	692.867	0	4	0
346	1	90	0	2	1	0	0	965.48	41572	692.867	0	4	0
347	1	90	0	4	1	0	0	965.48	41572	692.867	0	4	0
348	1	62	1	2	1	1	0	12.59	1041.7	17.3617	0	4	0
349	1	76	0	4	1	0	0	51.66	4229	70.4833	0	4	0
350	1	76	0	4	1	0	0	51.66	4229	70.4833	0	4	0
351	1	76	0	4	1	0	0	51.66	4229	70.4833	0	4	0
352	1	76	0	2	1	0	0	51.66	4229	70.4833	0	4	0
353	1	49	1	1	1	1	0	26.89	1930.7	32.1783	0	4	1
354	0	41	1	7	1	1	0	17.27	1230.7	20.5117	0	4	0
355	0	49	1	2	1	1	0	18.46	1477.9	24.6317	0	4	0
356	0	78	0	6	1	1	1	10.53	905.9	15.0983	0	4	0
357	0	81	1	1	1	1	0	27.97	2041.9	34.0317	0	4	0
358	0	81	1	2	1	1	0	27.97	2041.9	34.0317	0	4	0
359	0	34	1	4	1	1	1	28.97	2191.8	36.53	0	4	0
360	0	34	1	4	1	1	0	28.97	2191.8	36.53	0	4	0
361	0	34	1	4	1	1	0	28.97	2191.8	36.53	0	4	0
362	0	34	1	2	1	1	0	28.97	2191.8	36.53	0	4	0
363	1	30	1	2	1	1	0	18.98	1341.6	22.36	0	4	0
364	0	71	1	1	1	1	0	12.34	1026.7	17.1117	0	4	0
365	0	71	1	2	1	1	0	12.34	1026.7	17.1117	0	4	0
366	1	62	1	7	1	1	0	243.19	10902.1	181.702	0	4	0
367	0	53	1	1	1	1	0	53.2	2914	48.5667	0	4	0
368	0	53	1	2	1	1	0	53.2	2914	48.5667	0	4	0
369	1	63	0	1	1	1	0	96.67	4624.1	77.0683	0	4	0
370	1	63	0	2	1	1	0	96.67	4624.1	77.0683	0	4	0
371	1	58	1	2	1	1	0	373.37	19474	324.567	0	4	0
372	1	58	1	1	1	1	0	373.37	19474	324.567	0	4	0
373	0	52	1	2	1	1	0	18.17	1465.8	24.43	0	4	0
374	1	58	1	4	1	1	0	101.9	5201.6	86.6933	0	4	0
375	1	58	1	4	1	1	0	101.9	5201.6	86.6933	0	4	0
376	1	58	1	4	1	1	0	101.9	5201.6	86.6933	0	4	0
377	0	51	1	2	1	1	0	10.19	911.6	15.1933	0	4	0
378	0	51	1	2	1	1	0	10.19	911.6	15.1933	0	4	0
379	1	72	1	4	1	0	0	573.8	23576.2	392.937	1	4	0
380	0	72	1	4	1	1	0	54.76	2910.6	48.51	0	4	0
381	0	72	1	2	1	1	0	54.76	2910.6	48.51	0	4	0
382	0	72	1	4	1	1	0	54.76	2910.6	48.51	0	4	0
383	0	72	1	4	1	1	0	54.76	2910.6	48.51	0	4	0
384	1	37	1	2	1	1	0	47.54	2891.8	48.1967	0	4	0
385	1	66	1	4	1	1	0	50.88	2681.2	44.6867	0	4	0
386	1	66	1	4	1	1	0	50.88	2681.2	44.6867	0	4	0
387	0	68	1	2	1	1	0	19.38	1590.2	26.5033	0	4	0
388	0	68	1	2	1	1	0	19.38	1590.2	26.5033	0	4	0
389	0	68	1	2	1	1	0	19.38	1590.2	26.5033	0	4	0
390	1	77	1	2	1	1	0	60.59	3091.5	51.525	0	4	0
391	1	77	1	1	1	1	0	60.59	3091.5	51.525	0	4	0
392	1	77	1	2	1	1	0	60.59	3091.5	51.525	0	4	0
393	0	51	1	4	1	1	0	14.04	1198.7	19.9783	0	4	0
394	0	51	1	4	1	1	0	14.04	1198.7	19.9783	0	4	0
395	0	51	1	4	1	1	0	14.04	1198.7	19.9783	0	4	0
396	1	64	1	4	1	1	0	20.44	1327	22.1167	0	4	0
397	1	64	1	4	1	1	0	20.44	1327	22.1167	0	4	0
398	0	73	1	1	1	1	0	530.43	24505.1	408.418	0	4	0
399	1	75	0	2	1	1	0	268.79	11207.5	186.792	0	4	0
400	1	68	1	2	1	1	0	78.52	4168.4	69.4733	0	4	0
401	1	68	1	2	1	1	0	78.52	4168.4	69.4733	0	4	0
402	1	68	1	4	1	1	0	78.52	4168.4	69.4733	0	4	0
403	1	68	1	4	1	1	0	78.52	4168.4	69.4733	0	4	0
404	0	72	1	1	1	1	0	11.37	997	16.6167	0	4	0
405	0	72	1	2	1	1	0	11.37	997	16.6167	0	4	0
406	0	65	0	2	1	1	0	88.06	4378.7	72.9783	0	4	0
407	0	65	0	1	1	1	0	88.06	4378.7	72.9783	0	4	0
408	0	57	1	2	1	1	0	12.91	1046.4	17.44	0	4	0
409	0	57	1	3	1	1	0	12.91	1046.4	17.44	0	4	0
410	1	75	1	3	1	1	0	671.5	29709.2	495.153	10	4	1
411	1	29	1	3	1	1	0	21.46	1651.5	27.525	0	4	0
412	1	49	1	2	1	1	0	7.44	629.1	10.485	0	4	0
413	0	71	1	2	1	1	0	61.11	3253	54.2167	0	4	0
414	0	71	1	1	1	1	0	61.11	3253	54.2167	0	4	0
415	0	63	1	4	1	1	0	499.82	22770	379.5	0	4	0
416	0	63	1	4	1	1	0	499.82	22770	379.5	0	4	0
417	0	63	1	4	1	1	0	499.82	22770	379.5	0	4	0
418	1	65	1	2	1	1	0	187.07	8745	145.75	4	4	0
419	1	65	1	1	1	1	0	187.07	8745	145.75	4	4	0
420	1	65	1	2	1	1	0	187.07	8745	145.75	4	4	0
421	1	68	1	1	1	0	0	32.16	2099.5	34.9917	0	4	0
422	1	68	1	2	1	0	0	32.16	2099.5	34.9917	0	4	0
423	0	37	1	1	1	1	0	21.46	1651.5	27.525	0	4	0
424	0	56	1	1	1	1	0	998.26	42317	705.283	0	4	0
425	0	56	1	2	1	1	0	998.26	42317	705.283	0	4	0
426	1	62	1	7	1	1	0	24.01	1537.1	25.6183	2	4	0
427	1	54	1	2	1	1	0	24.89	1852.6	30.8767	0	4	0
428	0	45	1	2	1	1	0	51.66	4229	70.4833	0	4	0
429	0	45	1	1	1	1	0	51.66	4229	70.4833	0	4	0
430	0	46	1	1	1	1	0	9.7	887.2	14.7867	0	4	0
431	0	46	1	2	1	1	0	9.7	887.2	14.7867	0	4	0
432	1	69	1	3	1	1	0	25.9	1944.2	32.4033	0	4	0
433	0	47	1	2	1	1	0	47.82	2921.3	48.6883	0	4	0
434	1	70	1	1	1	1	0	9.3	829.5	13.825	0	4	0
435	1	51	1	2	1	1	0	21.6	1464.4	24.4067	1	4	0
436	1	51	1	1	1	1	0	21.6	1464.4	24.4067	1	4	0
437	0	39	0	3	1	1	0	8.83	735.7	12.2617	0	4	0
438	1	34	0	2	1	1	0	21.34	1552.6	25.8767	0	4	0
439	0	87	1	2	1	1	0	10.86	955.8	15.93	0	4	0
440	0	46	1	2	1	1	0	77.97	3998.1	66.635	0	4	0
441	0	46	1	1	1	1	0	77.97	3998.1	66.635	0	4	0
442	0	46	1	2	1	1	0	77.97	3998.1	66.635	0	4	0
443	0	72	1	2	1	1	0	54.76	2910.6	48.51	0	4	0
444	1	74	1	1	1	1	0	1174.33	50645.6	844.093	0	4	0
445	1	74	1	2	1	1	0	1174.33	50645.6	844.093	0	4	0
446	1	45	1	5	1	1	1	22.68	1716.4	28.6067	0	4	0
447	1	45	1	5	1	1	0	22.68	1716.4	28.6067	0	4	0
448	0	70	1	1	1	1	0	399.53	16977.8	282.963	0	4	0
449	0	70	1	2	1	1	0	399.53	16977.8	282.963	0	4	0
450	1	45	1	2	1	1	0	9.95	850.7	14.1783	0	4	0
451	0	39	1	1	1	1	0	48.75	2490.6	41.51	0	4	0
452	0	39	1	2	1	1	0	48.75	2490.6	41.51	0	4	0
453	1	43	1	7	1	0	0	61.46	3183.9	53.065	0	4	0
454	0	75	1	4	1	0	0	16.08	1370.4	22.84	0	4	0
455	0	65	1	4	1	0	0	88.15	4437.9	73.965	0	4	0
456	1	87	0	1	1	0	0	9.95	850.7	14.1783	0	4	0
457	0	54	1	3	1	1	0	43.05	2459.3	40.9883	0	4	0
458	0	50	0	2	1	1	0	22.26	1833.7	30.5617	1	4	0
459	1	31	0	2	1	1	0	26.48	2011.6	33.5267	0	4	0
460	1	31	0	1	1	1	0	26.48	2011.6	33.5267	0	4	0
461	1	50	1	2	1	1	0	34.66	2236.6	37.2767	0	4	0
462	1	50	1	1	1	1	0	34.66	2236.6	37.2767	0	4	0
463	1	41	1	7	1	1	0	21.46	1651.5	27.525	0	4	0
464	0	62	1	6	1	1	1	71.64	3609.2	60.1533	5	4	0
465	1	31	1	4	1	1	0	34.09	1926	32.1	0	4	0
466	1	31	1	4	1	1	0	34.09	1926	32.1	0	4	0
467	1	31	1	2	1	1	0	34.09	1926	32.1	0	4	0
468	1	31	1	4	1	1	0	34.09	1926	32.1	0	4	0
469	1	87	0	1	1	0	0	9.95	850.7	14.1783	5	4	0
470	1	31	1	2	1	1	0	34.09	1926	32.1	0	4	0
471	1	60	1	3	1	1	0	26.43	1944.1	32.4017	0	4	0
472	1	46	1	2	1	1	0	18.2	1304.1	21.735	0	4	0
473	1	60	1	1	1	0	0	12.49	1028.4	17.14	0	4	0
474	1	60	1	2	1	0	0	12.49	1028.4	17.14	0	4	0
475	0	66	1	3	1	1	0	32.16	2099.5	34.9917	0	4	0
476	0	75	1	1	1	1	0	18.97	1807.8	30.13	0	4	1
477	1	44	1	1	1	1	0	9.12	797.7	13.295	0	4	0
478	0	63	1	1	1	1	0	77.97	3998.1	66.635	0	4	0
479	0	52	1	4	1	1	1	69.57	3512.4	58.54	0	4	0
480	0	52	1	4	1	1	0	69.57	3512.4	58.54	0	4	0
481	0	52	1	4	1	1	0	69.57	3512.4	58.54	0	4	0
482	1	58	1	1	1	1	0	10.19	911.6	15.1933	0	4	0
483	1	58	1	2	1	1	0	10.19	911.6	15.1933	0	4	0
484	1	56	1	1	1	1	0	21.46	1651.5	27.525	0	4	0
485	1	56	1	2	1	1	0	21.46	1651.5	27.525	0	4	0
486	0	71	1	1	1	1	0	21.36	1424	23.7333	0	4	0
487	1	62	1	1	1	1	0	8.25	723.1	12.0517	0	4	0
488	1	62	1	2	1	1	0	8.25	723.1	12.0517	0	4	0
489	1	64	1	2	1	1	0	12.37	1019.1	16.985	0	4	0
490	0	56	1	4	1	1	0	82.09	4506.4	75.1067	0	4	0
491	0	56	1	4	1	1	0	82.09	4506.4	75.1067	0	4	0
492	0	56	1	4	1	1	0	82.09	4506.4	75.1067	0	4	0
493	0	60	1	4	1	1	0	58.14	3094.8	51.58	0	4	0
494	0	60	1	2	1	1	0	58.14	3094.8	51.58	0	4	0
495	0	60	1	4	1	1	0	58.14	3094.8	51.58	0	4	0
496	0	60	1	4	1	1	1	58.14	3094.8	51.58	12	4	0
497	1	27	1	5	1	1	0	61.22	3202.8	53.38	28	4	0
498	0	45	1	3	1	1	0	23.37	1554.4	25.9067	0	4	0
499	0	22	0	3	1	1	0	905.9	39432.7	657.212	6	4	0
500	0	34	0	3	1	1	0	57.59	3082.8	51.38	0	4	0
501	0	41	1	3	1	1	0	5.23	547.9	9.13167	5	4	0
502	0	38	1	2	1	1	0	78.73	3938.3	65.6383	0	4	0
503	0	38	1	3	1	1	0	78.73	3938.3	65.6383	0	4	0
504	0	69	1	1	1	1	0	22.73	1923.4	32.0567	0	4	0
505	0	69	1	2	1	1	0	22.73	1923.4	32.0567	0	4	0
506	1	64	1	4	1	1	0	20.44	1327	22.1167	0	4	0
507	1	65	1	7	1	1	0	7.25	624.6	10.41	9	4	0
508	1	75	0	2	1	1	0	268.79	11207.5	186.792	0	4	0
509	1	80	1	2	1	1	0	22.6	1645	27.4167	0	4	0
510	1	80	1	1	1	1	0	22.6	1645	27.4167	0	4	0
511	1	80	1	2	1	1	0	22.6	1645	27.4167	0	4	0
512	0	38	1	2	1	1	0	12.58	1074.9	17.915	0	4	0
513	0	38	1	1	1	1	0	12.58	1074.9	17.915	0	4	0
514	1	55	1	5	1	1	0	13.64	1240.3	20.6717	0	4	0
515	1	55	1	5	1	1	1	13.64	1240.3	20.6717	0	4	0
516	1	75	0	2	1	1	0	268.79	11207.5	186.792	0	4	0
517	1	75	0	1	1	1	0	268.79	11207.5	186.792	1	4	0
518	1	58	1	2	1	0	0	22.6	1645	27.4167	0	4	0
519	1	68	1	2	1	1	0	9.95	850.7	14.1783	0	4	0
520	1	68	1	1	1	1	0	9.95	850.7	14.1783	0	4	0
521	0	57	1	1	1	1	0	30.24	2244.6	37.41	0	4	0
522	0	57	1	2	1	1	0	30.24	2244.6	37.41	0	4	0
523	0	56	1	5	1	1	0	53.19	2777.7	46.295	0	4	0
524	1	73	1	2	1	1	0	24.48	2073.4	34.5567	0	4	0
525	1	74	1	1	1	1	0	42.97	2903.5	48.3917	0	4	0
526	1	74	1	2	1	1	0	42.97	2903.5	48.3917	0	4	0
527	0	52	1	2	1	1	0	11.08	1005	16.75	0	4	0
528	0	52	1	1	1	1	0	11.08	1005	16.75	0	4	0
529	0	53	1	2	1	0	0	11.08	1005	16.75	0	4	0
530	0	53	1	1	1	0	0	11.08	1005	16.75	0	4	0
531	0	51	1	2	1	1	0	11.08	1005	16.75	0	4	0
532	0	51	1	1	1	1	0	11.08	1005	16.75	0	4	0
533	1	55	0	2	1	1	0	146.53	6430.4	107.173	7	4	0
534	1	55	0	1	1	1	0	146.53	6430.4	107.173	7	4	0
535	1	55	0	2	1	1	0	146.53	6430.4	107.173	7	4	0
536	0	65	1	2	1	1	0	150.97	6697.3	111.622	0	4	0
537	0	65	1	1	1	1	0	150.97	6697.3	111.622	0	4	0
538	0	65	1	2	1	1	0	150.97	6697.3	111.622	0	4	0
539	1	43	0	2	1	1	0	136.64	6320.7	105.345	0	4	0
540	1	43	0	2	1	1	0	136.64	6320.7	105.345	0	4	0
541	1	43	0	2	1	1	0	136.64	6320.7	105.345	0	4	0
542	0	54	1	5	1	1	1	61.46	3183.9	53.065	0	4	0
543	0	48	1	2	1	0	0	21.6	1464.4	24.4067	28	4	0
544	0	58	1	7	1	1	0	22.1	1776.9	29.615	0	4	0
545	1	58	1	1	1	1	0	10.19	911.6	15.1933	0	4	0
546	1	58	1	2	1	1	0	10.19	911.6	15.1933	0	4	0
547	0	52	1	3	1	1	0	21.6	1464.4	24.4067	7	4	0
548	1	53	1	2	1	1	0	71.61	3637.8	60.63	0	4	0
549	1	30	1	6	1	1	1	94.44	4452.3	74.205	0	4	0
550	0	59	1	3	1	1	0	84.34	4310.5	71.8417	0	4	0
551	0	50	1	7	1	1	0	21.22	1639.5	27.325	0	4	0
552	0	57	1	6	1	1	1	85.3	4176.6	69.61	0	4	0
553	1	64	1	2	1	1	0	12.34	1026.7	17.1117	0	4	0
554	1	64	1	1	1	1	0	12.34	1026.7	17.1117	0	4	0
555	1	67	1	2	1	1	0	9.19	848.4	14.14	0	4	0
556	1	67	1	1	1	1	0	9.19	848.4	14.14	0	4	0
557	1	59	0	3	1	0	0	9.47	909.2	15.1533	12	4	0
558	1	49	1	3	1	1	0	7.44	629.1	10.485	0	4	0
559	1	45	1	2	1	1	0	9.95	850.7	14.1783	0	4	0
560	0	63	1	4	1	1	0	24.71	1728.4	28.8067	0	4	0
561	0	63	1	4	1	1	0	24.71	1728.4	28.8067	0	4	0
562	0	63	1	2	1	1	0	24.71	1728.4	28.8067	0	4	0
563	0	69	1	4	1	1	0	18.46	1477.9	24.6317	0	4	0
564	0	69	1	4	1	1	0	18.46	1477.9	24.6317	0	4	0
565	0	69	1	4	1	1	0	18.46	1477.9	24.6317	0	4	0
566	0	69	1	4	1	1	0	86.47	4330.5	72.175	0	4	0
567	0	69	1	4	1	1	0	86.47	4330.5	72.175	0	4	0
568	0	69	1	2	1	1	0	86.47	4330.5	72.175	0	4	0
569	0	69	1	2	1	1	0	86.47	4330.5	72.175	0	4	0
570	1	69	1	2	1	1	0	608.04	28013.5	466.892	0	4	0
571	1	69	1	1	1	1	0	608.04	28013.5	466.892	0	4	0
572	1	60	1	2	1	1	0	74.39	3765.5	62.7583	0	4	0
573	1	60	1	1	1	1	0	74.39	3765.5	62.7583	0	4	0
574	1	53	0	2	1	1	0	20.3	1422.3	23.705	0	4	0
575	1	53	0	3	1	1	0	20.3	1422.3	23.705	0	4	0
576	0	30	1	3	1	1	0	10.37	905.8	15.0967	6	4	0
577	1	53	1	2	1	1	0	225.69	10678.8	177.98	0	4	0
578	1	53	1	3	1	1	0	225.69	10678.8	177.98	0	4	0
579	1	45	1	5	1	1	1	18.17	1465.8	24.43	15	4	1
580	0	60	1	2	1	1	0	707.4	30804.5	513.408	0	4	0
581	0	60	1	2	1	1	0	707.4	30804.5	513.408	0	4	0
582	0	57	1	7	1	1	0	7.25	624.6	10.41	0	4	0
583	1	61	1	5	1	1	1	178.97	9557.9	159.298	16	4	1
584	1	61	1	5	1	1	1	178.97	9557.9	159.298	0	4	0
585	0	49	1	5	1	1	0	68.89	3521.8	58.6967	0	4	0
586	0	48	1	1	1	1	0	105.5	4961.2	82.6867	0	4	0
587	0	40	1	1	1	1	0	10.37	905.8	15.0967	0	4	0
588	0	48	1	2	1	1	0	105.5	4961.2	82.6867	0	4	0
589	0	60	1	1	1	1	0	46.88	2845.5	47.425	0	4	0
590	0	60	1	2	1	1	0	46.88	2845.5	47.425	0	4	0
591	0	61	1	5	1	1	0	19.52	1366.7	22.7783	2	4	0
592	0	55	1	1	1	1	0	59.49	3122.5	52.0417	0	4	0
593	0	55	1	2	1	1	0	59.49	3122.5	52.0417	0	4	0
594	1	80	1	2	1	1	0	62.08	3240.2	54.0033	0	4	0
595	1	80	1	2	1	1	0	62.08	3240.2	54.0033	0	4	0
596	1	70	1	2	1	1	0	30.6	2422.2	40.37	0	4	0
597	1	70	1	2	1	1	0	30.6	2422.2	40.37	0	4	0
598	0	70	1	2	1	1	0	10.19	911.6	15.1933	0	4	0
599	0	70	1	2	1	1	0	10.19	911.6	15.1933	0	4	0
600	1	50	0	5	1	1	1	51.66	4229	70.4833	0	4	0
601	1	50	0	5	1	1	1	51.66	4229	70.4833	0	4	0
602	1	63	1	2	1	1	0	34.66	2236.6	37.2767	0	4	0
603	1	63	1	1	1	1	0	34.66	2236.6	37.2767	0	4	0
604	0	73	0	2	1	0	0	280.9	12269.6	204.493	0	4	0
605	0	73	0	2	1	0	0	280.9	12269.6	204.493	0	4	0
606	0	73	0	1	1	0	0	280.9	12269.6	204.493	0	4	0
607	1	64	1	2	1	1	0	1181.93	50614.7	843.578	0	4	0
608	1	64	1	1	1	1	0	1181.93	50614.7	843.578	0	4	0
609	1	75	1	1	1	1	0	11.26	983.5	16.3917	0	4	0
610	0	30	1	1	1	1	0	7.37	715.1	11.9183	0	4	0
611	1	45	0	2	1	1	0	26.73	2006.8	33.4467	0	4	0
612	1	45	0	3	1	1	0	26.73	2006.8	33.4467	0	4	0
613	1	54	1	3	1	1	0	18.17	1465.8	24.43	0	4	0
614	0	46	1	3	1	1	0	66.21	3266.9	54.4483	0	4	0
615	0	44	1	3	1	1	0	52.36	2812.4	46.8733	0	4	0
616	0	70	1	4	1	0	0	247.99	11162.7	186.045	0	4	0
617	1	55	1	4	1	0	0	8.52	717.9	11.965	0	4	0
618	1	33	1	2	1	1	0	16.87	1379.7	22.995	0	4	0
619	1	64	1	2	1	1	0	112.24	5241.1	87.3517	0	4	0
620	1	64	1	1	1	1	0	112.24	5241.1	87.3517	0	4	0
621	0	76	1	2	1	1	0	817.86	36353.8	605.897	0	4	0
622	0	76	1	1	1	1	0	817.86	36353.8	605.897	0	4	0
623	0	67	1	5	1	1	1	24.12	1957.8	32.63	0	4	0
624	1	51	1	4	1	0	0	62.31	3333.6	55.56	0	4	0
625	1	61	1	2	1	1	0	20.3	1422.3	23.705	0	4	0
626	1	61	1	2	1	1	0	20.3	1422.3	23.705	0	4	0
627	0	55	1	2	1	1	0	81.4	4174.4	69.5733	0	4	0
628	1	64	1	1	1	1	0	25.82	1591.5	26.525	0	4	0
629	0	30	1	3	1	1	0	19.85	1356	22.6	0	4	0
630	1	64	1	3	1	1	0	26.54	1970.7	32.845	0	4	0
631	1	64	1	2	1	1	0	26.54	1970.7	32.845	0	4	0
632	0	69	1	1	1	0	0	30.6	2422.2	40.37	0	4	0
633	0	69	1	2	1	1	0	86.5	4350.5	72.5083	0	4	0
634	0	69	1	4	1	1	0	86.5	4350.5	72.5083	0	4	0
635	0	69	1	2	1	1	0	86.5	4350.5	72.5083	0	4	0
636	0	69	1	4	1	1	0	86.5	4350.5	72.5083	0	4	0
637	0	69	1	4	1	1	0	86.5	4350.5	72.5083	0	4	0
638	1	75	0	4	1	0	0	57.09	3027.4	50.4567	0	4	0
639	1	75	0	2	1	0	0	57.09	3027.4	50.4567	0	4	0
640	1	75	0	4	1	0	0	57.09	3027.4	50.4567	0	4	0
641	1	75	0	4	1	0	0	57.09	3027.4	50.4567	0	4	0
642	1	75	0	4	1	0	0	57.09	3027.4	50.4567	0	4	0
643	1	75	0	4	1	0	0	57.09	3027.4	50.4567	3	4	0
644	0	51	1	2	1	1	0	21.6	1464.4	24.4067	0	4	0
645	0	39	1	1	1	1	0	57.48	3073.2	51.22	0	4	0
646	1	75	0	2	1	1	0	32.18	2426.6	40.4433	0	4	0
647	1	75	0	2	1	1	0	32.18	2426.6	40.4433	0	4	0
648	1	43	1	2	1	1	0	18.98	1341.6	22.36	0	4	0
649	0	35	1	3	1	1	0	55.89	3121.2	52.02	0	4	0
650	1	53	1	3	1	1	0	228.22	10847.4	180.79	0	4	0
651	0	67	1	3	1	1	0	12.39	1024	17.0667	0	4	0
652	1	57	1	6	1	1	1	75.06	3812	63.5333	0	4	0
653	0	73	0	2	1	1	0	23.14	1553	25.8833	0	4	0
654	1	65	1	1	1	1	0	13	1084	18.0667	0	4	0
655	1	71	1	2	1	1	0	19.25	1400.7	23.345	0	4	0
656	1	71	1	2	1	1	0	19.25	1400.7	23.345	0	4	0
657	1	67	1	2	1	1	0	29.45	2129.4	35.49	0	4	0
658	1	67	1	2	1	1	0	29.45	2129.4	35.49	0	4	0
659	0	55	1	2	1	0	0	21.6	1464.4	24.4067	41	4	0
660	0	58	1	3	1	1	0	22.42	2103.9	35.065	0	4	0
661	0	55	1	2	1	1	0	49.5	2654.9	44.2483	0	4	0
662	0	83	1	2	1	0	0	21.52	1759.8	29.33	0	4	0
663	0	83	1	1	1	0	0	21.52	1759.8	29.33	0	4	0
664	0	74	1	4	1	1	1	42.97	2903.5	48.3917	0	4	0
665	0	74	1	4	1	1	0	42.97	2903.5	48.3917	0	4	0
666	0	74	1	2	1	1	0	42.97	2903.5	48.3917	0	4	0
667	0	74	1	4	1	1	0	42.97	2903.5	48.3917	0	4	0
668	0	61	1	1	1	1	0	22.26	1833.7	30.5617	0	4	0
669	0	61	1	2	1	1	0	22.26	1833.7	30.5617	0	4	0
670	0	35	1	2	1	1	0	7.25	624.6	10.41	0	4	0
671	0	35	1	3	1	1	0	7.25	624.6	10.41	0	4	0
672	1	35	0	4	1	1	0	21.81	1655.5	27.5917	0	1	0
673	1	35	0	4	1	1	0	21.81	1655.5	27.5917	0	1	0
674	1	35	0	4	1	1	0	21.81	1655.5	27.5917	0	1	0
675	0	55	1	1	1	1	0	44.28	3720.9	62.015	0	1	0
676	0	55	1	2	1	1	0	44.28	3720.9	62.015	0	1	0
677	0	65	1	2	1	0	0	30.6	2422.2	40.37	0	1	0
678	1	77	1	1	1	1	0	77.97	3998.1	66.635	0	1	0
679	1	77	1	2	1	1	0	77.97	3998.1	66.635	0	1	0
680	0	52	1	1	1	1	0	31.09	2571.2	42.8533	0	1	0
681	0	52	1	2	1	1	0	31.09	2571.2	42.8533	0	1	0
682	1	62	1	2	1	1	0	137.44	6347.3	105.788	0	1	0
683	1	62	1	1	1	1	0	137.44	6347.3	105.788	0	1	0
684	1	62	1	2	1	1	0	137.44	6347.3	105.788	0	1	0
685	1	36	1	3	1	1	0	216.29	9986.5	166.442	0	1	0
686	1	29	1	3	1	1	0	24.88	1875	31.25	0	1	0
687	0	55	1	2	1	1	0	81.4	4174.4	69.5733	0	1	0
688	0	55	1	1	1	1	0	81.4	4174.4	69.5733	0	1	0
689	0	55	1	2	1	1	0	81.4	4174.4	69.5733	0	1	0
690	1	57	1	1	1	1	0	19.52	1366.7	22.7783	0	1	0
691	0	58	1	1	1	0	0	42.97	2903.5	48.3917	0	1	0
692	0	58	1	2	1	0	0	42.97	2903.5	48.3917	0	1	0
693	0	58	1	1	1	0	0	42.97	2903.5	48.3917	0	1	0
694	1	53	1	7	1	1	0	22.73	1923.4	32.0567	0	1	0
695	1	71	1	1	1	1	0	12.34	1026.7	17.1117	0	1	1
696	1	71	1	2	1	1	0	12.34	1026.7	17.1117	0	1	1
697	0	73	0	2	1	1	0	23.14	1553	25.8833	0	1	0
698	0	61	1	2	1	0	0	9.41	816.7	13.6117	0	1	0
699	0	61	1	2	1	0	0	9.41	816.7	13.6117	0	1	0
700	0	68	1	2	1	1	0	19.38	1590.2	26.5033	0	1	0
701	0	68	1	1	1	1	0	19.38	1590.2	26.5033	0	1	0
702	0	63	1	4	1	1	0	42.12	3136.9	52.2817	0	1	0
703	0	63	1	2	1	1	0	42.12	3136.9	52.2817	0	1	0
704	0	63	1	4	1	1	0	42.12	3136.9	52.2817	0	1	0
705	0	63	1	4	1	1	0	42.12	3136.9	52.2817	5	4	0
706	0	61	1	1	1	1	0	9.16	816.6	13.61	0	1	0
707	0	61	1	2	1	1	0	9.16	816.6	13.61	0	1	0
708	1	73	0	4	1	1	0	25.47	1903.2	31.72	0	1	0
709	1	73	0	2	1	1	0	25.47	1903.2	31.72	0	1	0
710	1	73	0	4	1	1	0	25.47	1903.2	31.72	0	1	0
711	1	73	0	4	1	1	0	25.47	1903.2	31.72	0	1	0
712	1	65	1	4	1	1	0	56.58	3004.1	50.0683	0	1	0
713	1	65	1	4	1	1	0	56.58	3004.1	50.0683	0	1	0
714	0	41	1	2	1	1	0	7.56	619.4	10.3233	0	1	0
715	1	79	0	4	1	0	0	51.66	4229	70.4833	0	4	0
716	1	56	1	4	1	0	0	28.11	2222.7	37.045	0	4	0
717	0	35	1	4	1	1	0	62.56	3281.5	54.6917	0	4	0
718	1	70	1	4	1	0	0	81.25	4072.2	67.87	0	4	0
719	1	75	1	2	1	1	0	35.71	3058.9	50.9817	0	1	0
720	1	75	1	1	1	1	0	35.71	3058.9	50.9817	0	1	0
721	0	60	1	2	1	1	0	57.09	3027.4	50.4567	0	1	0
722	0	60	1	1	1	1	0	57.09	3027.4	50.4567	0	1	0
723	0	57	1	2	1	1	0	387.28	18568.4	309.473	0	1	0
724	0	57	1	3	1	1	0	387.28	18568.4	309.473	0	1	0
725	1	54	1	5	1	1	0	18.17	1465.8	24.43	0	1	0
726	0	52	1	4	1	1	1	213.07	9530.6	158.843	0	1	0
727	0	52	1	2	1	1	0	213.07	9530.6	158.843	0	1	0
728	0	52	1	4	1	1	0	213.07	9530.6	158.843	0	1	0
729	1	96	0	4	1	1	0	51.66	4229	70.4833	7	4	0
730	1	96	0	2	1	1	0	51.66	4229	70.4833	0	1	0
731	1	96	0	4	1	1	0	51.66	4229	70.4833	0	1	0
732	1	96	0	4	1	1	0	51.66	4229	70.4833	0	1	0
733	1	77	1	2	1	1	0	60.59	3091.5	51.525	0	1	0
734	1	77	1	1	1	1	0	60.59	3091.5	51.525	0	1	0
735	1	66	1	4	1	1	0	34.87	2766.1	46.1017	0	1	0
736	1	66	1	4	1	1	0	34.87	2766.1	46.1017	0	1	0
737	1	66	1	4	1	1	0	34.87	2766.1	46.1017	0	1	0
738	0	49	1	4	1	1	0	30.01	2208.5	36.8083	0	1	0
739	0	49	1	4	1	1	0	30.01	2208.5	36.8083	0	1	0
740	0	49	1	4	1	1	0	30.01	2208.5	36.8083	0	1	0
741	0	49	1	2	1	1	0	30.01	2208.5	36.8083	0	1	0
742	1	72	1	1	1	1	0	8.83	735.7	12.2617	0	1	0
743	1	72	1	2	1	1	0	8.83	735.7	12.2617	0	1	0
744	1	45	1	2	1	1	0	9.95	850.7	14.1783	0	1	0
745	1	54	1	1	1	1	0	59.18	3287.8	54.7967	0	1	0
746	0	66	1	1	1	1	0	86.18	4298.9	71.6483	0	1	0
747	0	66	1	2	1	1	0	86.18	4298.9	71.6483	0	1	0
748	1	27	1	5	1	0	0	23.32	1891.7	31.5283	0	1	0
749	0	73	1	4	1	1	0	36.15	2012.7	33.545	0	1	0
750	0	73	1	4	1	1	0	36.15	2012.7	33.545	0	1	0
751	0	73	1	4	1	1	0	36.15	2012.7	33.545	0	1	0
752	0	73	1	2	1	1	0	36.15	2012.7	33.545	0	1	0
753	1	64	1	3	1	1	0	7.37	715.1	11.9183	0	1	0
754	1	58	1	5	1	1	1	101.9	5201.6	86.6933	0	1	0
755	0	46	1	2	1	1	0	17.76	1287.5	21.4583	0	1	0
756	1	59	1	5	1	1	0	60.59	3274.1	54.5683	0	1	0
757	1	46	1	3	1	1	0	16.5	1287.8	21.4633	5	1	0
758	0	75	1	2	1	1	0	8.63	759.5	12.6583	0	1	0
759	0	75	1	1	1	1	0	8.63	759.5	12.6583	0	1	0
760	0	42	1	1	1	1	0	19.52	1366.7	22.7783	0	1	0
761	0	42	1	2	1	1	0	19.52	1366.7	22.7783	0	1	0
762	0	57	1	1	1	1	0	1155.53	52853.2	880.887	0	1	0
763	0	57	1	2	1	1	0	1155.53	52853.2	880.887	0	1	0
764	0	60	1	1	1	1	0	22.6	1645	27.4167	0	1	0
765	1	79	0	1	1	1	0	51.66	4229	70.4833	0	1	0
766	1	79	0	2	1	1	0	51.66	4229	70.4833	0	1	0
767	1	79	0	2	1	1	0	51.66	4229	70.4833	0	1	0
768	1	79	0	2	1	1	0	51.66	4229	70.4833	0	1	0
769	1	36	1	3	1	1	0	157.97	7825.9	130.432	0	1	0
770	1	61	1	2	1	1	0	37.39	2429.4	40.49	0	1	0
771	1	61	1	2	1	1	0	37.39	2429.4	40.49	0	1	0
772	1	61	1	2	1	1	0	37.39	2429.4	40.49	0	1	0
773	1	63	0	2	1	1	0	16.5	1287.8	21.4633	0	1	0
774	1	63	0	1	1	1	0	16.5	1287.8	21.4633	0	1	0
775	0	65	1	1	1	1	0	61	3169.8	52.83	0	1	0
776	0	65	1	2	1	1	0	61	3169.8	52.83	0	1	0
777	0	65	1	2	1	1	0	61	3169.8	52.83	0	1	0
778	0	82	0	4	1	1	0	59.65	3143.8	52.3967	0	1	0
779	0	82	0	2	1	1	0	59.65	3143.8	52.3967	0	1	0
780	0	82	0	4	1	1	0	59.65	3143.8	52.3967	0	1	0
781	1	65	1	4	1	0	0	60.59	3091.5	51.525	0	1	0
782	0	82	0	2	1	1	0	59.65	3143.8	52.3967	0	1	0
783	0	82	0	2	1	1	0	59.65	3143.8	52.3967	0	1	0
784	1	66	1	4	1	0	0	30.24	2244.6	37.41	0	1	0
785	0	82	0	4	1	1	0	59.65	3143.8	52.3967	0	1	0
786	0	48	1	1	1	0	0	12.62	1177.6	19.6267	8	4	1
787	1	65	1	3	1	1	0	8.12	715	11.9167	0	1	0
788	0	39	0	3	1	1	0	12.29	1007.1	16.785	0	1	0
789	0	73	1	1	1	1	0	43.05	2459.3	40.9883	0	1	0
790	0	73	1	2	1	1	0	43.05	2459.3	40.9883	0	1	0
791	1	75	1	1	1	1	0	876.83	37284.8	621.413	0	1	0
792	0	71	1	2	1	1	0	87.74	4513.2	75.22	0	1	0
793	0	71	1	1	1	1	0	87.74	4513.2	75.22	0	1	0
794	0	71	1	2	1	1	0	87.74	4513.2	75.22	0	1	0
795	1	48	1	2	1	1	0	137.08	6324	105.4	0	1	0
796	0	79	1	4	1	1	0	90.71	4554.4	75.9067	0	1	0
797	0	79	1	5	1	1	0	90.71	4554.4	75.9067	2	1	0
798	1	48	1	2	1	1	0	137.08	6324	105.4	2	1	0
799	0	63	1	2	1	1	0	1010.1	43953.6	732.56	0	1	0
800	0	63	1	1	1	1	0	1010.1	43953.6	732.56	0	1	0
801	0	63	1	2	1	1	0	1010.1	43953.6	732.56	0	1	0
802	1	68	1	2	1	1	0	12.91	1046.4	17.44	2	1	0
803	1	68	1	1	1	1	0	12.91	1046.4	17.44	2	1	0
804	1	68	1	2	1	1	0	12.91	1046.4	17.44	2	1	0
805	0	74	1	2	1	1	0	19.52	1366.7	22.7783	0	1	0
806	0	74	1	1	1	1	0	19.52	1366.7	22.7783	0	1	0
807	0	58	1	7	1	0	0	59.65	3143.8	52.3967	0	1	0
808	1	64	1	3	1	1	0	51.66	4229	70.4833	0	1	0
809	1	64	1	2	1	1	0	51.66	4229	70.4833	0	1	0
810	1	45	1	2	1	1	0	9.95	850.7	14.1783	0	1	0
811	0	42	1	6	1	1	1	67.83	3835.7	63.9283	0	1	0
812	0	60	1	7	1	1	0	12.49	1028.4	17.14	1	1	0
813	0	60	0	2	1	1	0	5.23	547.9	9.13167	0	1	0
814	0	60	0	1	1	1	0	5.23	547.9	9.13167	0	1	0
815	0	22	0	2	1	1	0	98.71	5002.2	83.37	0	1	0
816	0	22	0	1	1	1	0	98.71	5002.2	83.37	0	1	0
817	0	75	0	2	1	1	0	97.73	4663.7	77.7283	0	1	0
818	0	75	0	1	1	1	0	97.73	4663.7	77.7283	0	1	0
819	0	91	0	4	1	1	0	631.44	25482.4	424.707	0	1	0
820	0	91	0	4	1	1	0	631.44	25482.4	424.707	0	1	0
821	0	91	0	4	1	1	0	631.44	25482.4	424.707	0	1	0
822	0	91	0	2	1	1	0	631.44	25482.4	424.707	0	1	0
823	1	85	0	1	1	1	0	86.18	4298.9	71.6483	0	1	0
824	1	85	0	2	1	1	0	86.18	4298.9	71.6483	0	1	0
825	1	85	0	2	1	1	0	86.18	4298.9	71.6483	0	1	0
826	1	79	0	2	1	1	0	20.05	1638.4	27.3067	0	1	0
827	1	79	0	1	1	1	0	20.05	1638.4	27.3067	0	1	0
828	0	59	1	1	1	1	0	42.97	2903.5	48.3917	0	1	0
829	0	46	1	1	1	1	0	21.46	1651.5	27.525	0	1	0
830	0	46	1	2	1	1	0	21.46	1651.5	27.525	0	1	0
831	1	65	0	1	1	1	0	28.15	2209.8	36.83	0	1	0
832	1	65	0	2	1	1	0	28.15	2209.8	36.83	0	1	0
833	0	66	1	2	1	1	0	10.53	905.9	15.0983	0	1	0
834	1	24	1	5	1	1	0	43.05	2459.3	40.9883	6	1	0
835	0	66	1	2	1	1	0	19.53	1399.7	23.3283	0	1	0
836	0	66	1	2	1	1	0	19.53	1399.7	23.3283	0	1	0
837	0	65	1	4	1	1	0	13.77	1210.8	20.18	0	1	0
838	0	65	1	4	1	1	0	13.77	1210.8	20.18	0	1	0
839	0	65	1	4	1	1	0	13.77	1210.8	20.18	0	1	0
840	0	65	1	2	1	1	0	13.77	1210.8	20.18	0	1	0
841	0	82	0	2	1	1	0	59.65	3143.8	52.3967	0	1	0
842	1	64	1	2	1	1	0	12.34	1026.7	17.1117	0	1	0
843	1	64	1	1	1	1	0	12.34	1026.7	17.1117	0	1	0
844	0	52	1	4	1	0	0	11.08	1005	16.75	0	1	0
845	0	52	1	4	1	0	0	11.08	1005	16.75	0	1	0
846	0	52	1	2	1	0	0	11.08	1005	16.75	0	1	0
847	1	75	0	1	1	1	0	268.79	11207.5	186.792	0	1	0
848	1	51	1	2	1	1	0	34.87	2766.1	46.1017	0	1	0
849	1	51	1	1	1	1	0	34.87	2766.1	46.1017	0	1	0
850	1	54	1	1	1	1	0	84.34	4310.5	71.8417	0	1	0
851	0	68	1	2	1	1	0	26.88	2018	33.6333	0	1	0
852	0	68	1	1	1	1	0	26.88	2018	33.6333	0	1	0
853	1	75	1	1	1	1	0	42.97	2903.5	48.3917	0	1	0
854	1	75	1	2	1	1	0	42.97	2903.5	48.3917	0	1	0
855	0	23	0	6	1	1	1	219.86	10047.7	167.462	0	1	0
856	1	59	1	4	1	1	0	9.41	789.7	13.1617	0	1	0
857	1	59	1	4	1	1	0	9.41	789.7	13.1617	0	1	0
858	1	59	1	4	1	1	0	9.41	789.7	13.1617	0	1	0
859	1	55	1	1	1	1	0	51.66	4229	70.4833	0	1	0
860	1	55	1	2	1	1	0	51.66	4229	70.4833	0	1	0
861	0	43	1	4	1	1	0	22.69	1452.7	24.2117	0	1	0
862	0	44	1	4	1	1	0	22.69	1452.7	24.2117	0	1	0
863	0	44	1	2	1	1	0	22.69	1452.7	24.2117	0	1	0
864	0	44	1	4	1	1	0	22.69	1452.7	24.2117	0	1	0
865	0	44	1	2	1	1	0	22.69	1452.7	24.2117	0	1	0
866	1	21	0	2	1	1	0	51.66	4229	70.4833	0	1	0
867	1	21	0	2	1	1	0	51.66	4229	70.4833	0	1	0
868	1	61	1	2	1	1	0	96.14	5058.5	84.3083	0	1	0
869	1	61	1	2	1	1	0	96.14	5058.5	84.3083	0	1	0
870	1	56	0	4	1	1	0	30.24	2244.6	37.41	0	1	0
871	1	56	0	2	1	1	0	30.24	2244.6	37.41	0	1	0
872	1	56	0	4	1	1	0	30.24	2244.6	37.41	0	1	0
873	1	56	0	4	1	1	0	30.24	2244.6	37.41	0	1	0
874	1	52	1	1	1	1	0	31.09	2571.2	42.8533	0	1	0
875	1	52	1	2	1	1	0	31.09	2571.2	42.8533	0	1	0
876	1	57	0	2	1	1	0	9.95	850.7	14.1783	50	4	0
877	0	52	1	1	1	1	0	30.89	2332.8	38.88	0	1	0
878	0	52	1	2	1	1	0	30.89	2332.8	38.88	0	1	0
879	1	72	1	3	1	1	0	21.46	1651.5	27.525	9	4	0
880	1	37	1	3	1	1	0	59.65	3143.8	52.3967	0	1	0
881	0	66	1	1	1	1	0	143.69	6256.4	104.273	0	1	0
882	0	47	1	1	1	1	0	15.92	1261.5	21.025	0	1	0
883	0	72	1	1	1	1	0	337.95	15209.1	253.485	0	1	0
884	0	65	1	4	1	1	0	37.06	2489.3	41.4883	0	4	0
885	0	65	1	4	1	1	0	37.06	2489.3	41.4883	0	1	0
886	0	65	1	4	1	1	0	37.06	2489.3	41.4883	0	1	0
887	0	69	1	2	1	1	0	88.66	4487	74.7833	0	1	0
888	0	69	1	1	1	1	0	88.66	4487	74.7833	0	1	0
889	0	32	1	2	1	1	0	21.6	1464.4	24.4067	0	1	0
890	0	32	1	1	1	1	0	21.6	1464.4	24.4067	0	1	0
891	0	54	0	4	1	0	0	10.97	920.5	15.3417	0	1	0
892	0	54	0	2	1	0	0	10.97	920.5	15.3417	0	1	0
893	0	54	0	4	1	0	0	10.97	920.5	15.3417	0	1	0
894	0	54	0	4	1	0	0	10.97	920.5	15.3417	0	1	0
895	0	54	0	4	1	0	0	10.97	920.5	15.3417	0	1	0
896	0	62	1	4	1	1	1	23.14	1553	25.8833	0	1	0
897	0	62	1	4	1	1	0	23.14	1553	25.8833	0	1	0
898	0	62	1	4	1	1	0	23.14	1553	25.8833	0	1	0
899	1	82	0	4	1	1	0	10.19	911.6	15.1933	0	1	0
900	1	82	0	4	1	1	0	10.19	911.6	15.1933	0	1	0
901	1	82	0	4	1	1	0	10.19	911.6	15.1933	0	1	0
902	0	65	1	4	1	1	0	325.12	14638.8	243.98	0	1	0
903	0	65	1	4	1	1	0	325.12	14638.8	243.98	0	1	0
904	0	88	1	1	1	0	0	10.28	879.6	14.66	7	1	1
905	0	43	1	1	1	1	0	26.54	1970.7	32.845	0	1	0
906	0	45	1	4	1	0	0	24.01	1537.1	25.6183	0	1	0
907	0	45	1	4	1	0	0	24.01	1537.1	25.6183	0	1	0
908	0	45	1	2	1	0	0	24.01	1537.1	25.6183	0	1	0
909	0	61	1	2	1	1	0	16.87	1379.7	22.995	0	1	0
910	0	61	1	1	1	1	0	16.87	1379.7	22.995	0	1	0
911	1	53	1	3	1	1	0	1245.59	54257.3	904.288	0	1	0
912	1	53	1	2	1	1	0	1245.59	54257.3	904.288	0	1	0
913	1	62	1	1	1	1	0	48.49	3810	63.5	1	1	0
914	1	62	1	2	1	1	0	48.49	3810	63.5	1	1	0
915	1	60	1	3	1	1	0	12.49	1028.4	17.14	0	1	0
916	1	71	1	5	1	1	0	8.82	779.4	12.99	0	1	1
917	1	72	1	1	1	1	0	34.66	2236.6	37.2767	0	1	0
918	1	72	1	2	1	1	0	34.66	2236.6	37.2767	0	1	0
919	1	37	1	3	1	1	0	18.77	1541.2	25.6867	0	1	0
920	1	37	1	2	1	1	0	18.77	1541.2	25.6867	0	1	0
921	1	62	0	1	1	1	0	11.97	998.4	16.64	0	1	0
922	1	62	0	2	1	1	0	11.97	998.4	16.64	0	1	0
923	1	62	0	2	1	1	0	11.97	998.4	16.64	0	1	0
924	0	75	1	2	1	1	0	59.18	3287.8	54.7967	0	1	0
925	0	75	1	1	1	1	0	59.18	3287.8	54.7967	0	1	0
926	1	59	1	4	1	1	1	27.97	2041.9	34.0317	5	1	0
927	1	59	1	4	1	1	0	27.97	2041.9	34.0317	0	1	0
928	1	59	1	4	1	1	0	27.97	2041.9	34.0317	0	1	0
929	0	58	1	1	1	1	0	23.14	1553	25.8833	0	1	0
930	1	83	0	4	1	1	0	108.09	5055.7	84.2617	0	1	0
931	1	83	0	4	1	1	0	108.09	5055.7	84.2617	0	1	0
932	1	83	0	4	1	1	0	108.09	5055.7	84.2617	0	1	0
933	0	83	0	4	1	1	0	42.97	2903.5	48.3917	1	1	1
934	0	83	0	4	1	1	0	42.97	2903.5	48.3917	0	1	0
935	1	69	1	1	1	1	0	32.18	2426.6	40.4433	0	1	0
936	1	69	1	2	1	1	0	32.18	2426.6	40.4433	0	1	0
937	0	60	1	6	1	1	1	129.64	6152.9	102.548	29	4	0
938	1	38	1	2	1	1	0	11.08	1005	16.75	0	1	0
939	1	38	1	1	1	1	0	11.08	1005	16.75	0	1	0
940	1	64	1	2	1	1	0	51.66	4229	70.4833	0	1	0
941	1	64	1	2	1	1	0	51.66	4229	70.4833	0	1	0
942	1	47	1	2	1	1	0	132.6	5915.3	98.5883	0	1	0
943	1	47	1	1	1	1	0	132.6	5915.3	98.5883	0	1	0
944	1	45	1	2	1	1	0	9.95	850.7	14.1783	0	1	0
945	0	70	1	1	1	0	0	22.73	1923.4	32.0567	0	1	0
946	0	76	0	1	1	1	0	99.98	4800	80	0	1	0
947	0	76	0	2	1	1	0	99.98	4800	80	0	1	0
948	0	78	1	4	1	1	0	74.39	3765.5	62.7583	0	1	0
949	0	78	1	2	1	1	0	74.39	3765.5	62.7583	0	1	0
950	0	78	1	4	1	1	0	74.39	3765.5	62.7583	0	1	0
951	1	77	1	6	1	0	1	80.26	3970	66.1667	0	1	0
952	1	44	1	3	1	1	0	22.6	1645	27.4167	0	1	0
953	1	63	1	5	1	1	0	34.66	2236.6	37.2767	0	1	0
954	1	62	1	3	1	1	0	1194.05	55753.6	929.227	0	1	0
955	1	62	1	2	1	1	0	1194.05	55753.6	929.227	0	1	0
956	0	65	1	3	1	1	0	51.66	4229	70.4833	0	1	0
957	1	44	1	2	1	1	0	21.46	1651.5	27.525	0	1	0
958	0	34	1	3	1	1	0	12.34	1026.7	17.1117	0	1	0
959	1	63	1	1	1	1	0	9.46	845.6	14.0933	0	1	0
960	1	63	1	2	1	1	0	9.46	845.6	14.0933	0	1	0
961	1	49	1	1	1	1	0	9.41	816.7	13.6117	0	1	0
962	1	49	1	2	1	1	0	9.41	816.7	13.6117	0	1	0
963	0	58	1	2	1	1	0	58.85	3114.8	51.9133	0	1	0
964	0	58	1	1	1	1	0	58.85	3114.8	51.9133	0	1	0
965	0	59	1	2	1	1	0	80.01	3998.6	66.6433	0	1	0
966	0	59	1	1	1	1	0	80.01	3998.6	66.6433	0	1	0
967	0	61	1	2	1	1	0	65.62	3696.4	61.6067	0	1	0
968	0	61	1	1	1	1	0	65.62	3696.4	61.6067	0	1	0
969	1	63	0	2	1	1	0	33.79	2255.3	37.5883	0	1	0
970	0	61	1	2	1	1	0	65.62	3696.4	61.6067	0	1	0
971	0	61	1	2	1	1	0	65.62	3696.4	61.6067	0	1	0
972	0	61	1	1	1	1	0	65.62	3696.4	61.6067	0	1	0
973	0	61	1	2	1	1	0	65.62	3696.4	61.6067	0	1	0
974	0	62	0	2	1	1	0	141.77	6526.4	108.773	0	1	0
975	0	62	0	1	1	1	0	141.77	6526.4	108.773	0	1	0
976	0	62	0	2	1	1	0	141.77	6526.4	108.773	0	1	0
977	0	63	1	1	1	1	0	5.89	548.6	9.14333	0	1	0
978	0	63	1	2	1	1	0	5.89	548.6	9.14333	0	1	0
979	0	44	1	3	1	1	0	7.56	619.4	10.3233	0	1	0
980	1	33	1	3	1	1	0	19.52	1366.7	22.7783	0	1	0
981	0	59	1	1	1	1	0	760.81	32528.9	542.148	0	1	0
982	0	53	1	5	1	1	0	10.08	902.7	15.045	0	1	0
983	1	56	0	4	1	1	0	30.24	2244.6	37.41	0	1	0
984	1	56	0	4	1	1	0	30.24	2244.6	37.41	0	1	0
985	1	29	1	7	1	1	0	42.97	2903.5	48.3917	4	1	0
986	0	35	1	5	1	1	1	224.02	9920.4	165.34	0	1	0
987	0	35	1	5	1	1	0	224.02	9920.4	165.34	0	1	0
988	0	54	0	2	1	1	0	10.97	920.5	15.3417	0	1	0
989	0	74	1	4	1	0	0	206.12	10489.8	174.83	0	1	0
990	0	64	1	4	1	0	0	19.52	1366.7	22.7783	0	1	0
991	1	81	0	2	1	1	0	51.66	4229	70.4833	0	1	0
992	1	81	0	1	1	1	0	51.66	4229	70.4833	0	1	0
993	0	62	1	2	1	1	0	61.67	3200	53.3333	0	1	0
994	0	62	1	1	1	1	0	61.67	3200	53.3333	0	1	0
995	0	40	1	1	1	1	0	60.42	3080.5	51.3417	0	1	0
996	0	40	1	2	1	1	0	60.42	3080.5	51.3417	0	1	0
997	0	73	1	2	1	1	0	4.84	443.6	7.39333	0	1	0
998	0	73	1	1	1	1	0	4.84	443.6	7.39333	0	1	0
999	1	70	1	7	1	1	0	731.02	28875.1	481.252	5	1	0
1000	1	60	1	5	1	1	0	52.75	3779.3	62.9883	27	4	1
1001	0	52	1	6	1	1	1	51.66	4229	70.4833	0	1	0
1002	0	52	1	4	1	1	0	51.66	4229	70.4833	0	1	0
1003	0	23	1	2	1	1	0	5.23	547.9	9.13167	0	1	0
1004	1	70	0	1	1	1	0	127.86	5537.8	92.2967	0	1	0
1005	1	70	0	2	1	1	0	127.86	5537.8	92.2967	0	1	0
1006	0	56	1	2	1	1	0	23.37	1666.6	27.7767	60	1	0
1007	0	54	1	4	1	1	0	47.82	2921.3	48.6883	0	1	0
1008	0	54	1	4	1	1	0	47.82	2921.3	48.6883	0	1	0
1009	0	54	1	4	1	1	0	47.82	2921.3	48.6883	0	1	0
1010	0	34	1	3	1	1	0	18.46	1477.9	24.6317	0	1	0
1011	0	34	1	2	1	1	0	18.46	1477.9	24.6317	0	1	0
1012	1	40	1	3	1	1	0	56.58	3004.1	50.0683	0	1	0
1013	1	41	0	2	1	1	0	73.09	3604.8	60.08	0	1	0
1014	1	44	1	2	1	1	0	58.85	3114.8	51.9133	0	1	0
1015	1	44	1	2	1	1	0	58.85	3114.8	51.9133	0	1	0
1016	0	66	1	2	1	1	0	24.01	1537.1	25.6183	0	1	0
1017	0	66	1	1	1	1	0	24.01	1537.1	25.6183	0	1	0
1018	0	77	1	2	1	1	0	5.23	547.9	9.13167	0	1	0
1019	0	77	1	1	1	1	0	5.23	547.9	9.13167	0	1	0
1020	0	73	1	2	1	1	0	4.84	443.6	7.39333	0	1	0
1021	0	73	1	1	1	1	0	4.84	443.6	7.39333	0	1	0
1022	1	73	0	1	1	1	0	1040.76	45046.5	750.775	0	1	0
1023	1	73	0	2	1	1	0	1040.76	45046.5	750.775	0	1	0
1024	0	72	1	2	1	1	0	88.73	4480.7	74.6783	0	1	0
1025	0	72	1	1	1	1	0	88.73	4480.7	74.6783	0	1	0
1026	1	39	1	7	1	1	0	12.36	1014	16.9	2	1	0
1027	1	52	1	3	1	1	0	54.52	2881.2	48.02	8	1	0
1028	1	63	1	1	1	1	0	21.81	1655.5	27.5917	0	1	0
1029	1	41	1	3	1	1	0	100.19	5069.9	84.4983	0	1	0
1030	1	58	0	2	1	1	0	20.35	1420.8	23.68	0	1	0
1031	1	63	1	2	1	1	0	21.81	1655.5	27.5917	0	1	0
1032	0	60	1	5	1	0	1	30.24	2244.6	37.41	12	1	1
1033	0	61	1	5	1	1	0	19.52	1366.7	22.7783	0	1	0
1034	1	75	0	1	1	1	0	268.79	11207.5	186.792	0	1	0
1035	1	56	0	4	1	1	0	30.24	2244.6	37.41	0	1	0
1036	0	63	1	4	1	1	0	42.12	3136.9	52.2817	0	1	0
1037	0	69	1	7	1	1	0	27	2069	34.4833	1	1	0
1038	0	61	1	1	1	1	0	61.25	3306.4	55.1067	0	1	0
1039	0	61	1	2	1	1	0	61.25	3306.4	55.1067	0	1	0
1040	1	54	1	2	1	1	0	24.89	1852.6	30.8767	0	1	0
1041	1	54	1	2	1	1	0	24.89	1852.6	30.8767	0	1	0
1042	0	61	0	1	1	1	0	12.49	1028.4	17.14	0	1	0
1043	0	61	0	2	1	1	0	12.49	1028.4	17.14	0	1	0
1044	1	80	0	3	1	1	0	10.37	905.8	15.0967	0	1	0
1045	1	44	1	4	1	1	0	19.53	1399.7	23.3283	0	1	0
1046	1	44	1	2	1	1	0	19.53	1399.7	23.3283	0	1	0
1047	0	61	1	1	1	1	0	30.24	2244.6	37.41	0	1	0
1048	1	33	1	2	1	1	0	4.84	443.6	7.39333	0	1	0
1049	1	33	1	2	1	1	0	4.84	443.6	7.39333	0	1	0
1050	1	64	0	3	1	1	0	35.26	2249	37.4833	0	1	0
1051	0	73	1	4	1	1	0	54.76	2910.6	48.51	0	1	0
1052	0	73	0	2	1	1	0	30.6	2422.2	40.37	0	1	0
1053	0	73	0	1	1	1	0	30.6	2422.2	40.37	0	1	0
1054	0	50	1	1	1	1	0	18.17	1465.8	24.43	0	1	0
1055	0	50	1	2	1	1	0	18.17	1465.8	24.43	0	1	0
1056	0	58	1	7	1	0	0	42.97	2903.5	48.3917	0	1	0
1057	0	39	1	6	1	1	1	86.18	4298.9	71.6483	0	1	0
1058	1	68	0	2	1	1	0	54.52	2897	48.2833	0	1	0
1059	1	68	0	2	1	1	0	54.52	2897	48.2833	0	1	0
1060	0	72	1	2	1	1	0	337.95	15209.1	253.485	0	1	0
1061	0	72	1	1	1	1	0	337.95	15209.1	253.485	0	1	0
1062	0	72	1	2	1	1	0	337.95	15209.1	253.485	0	1	0
1063	0	46	1	3	1	1	0	5.89	548.6	9.14333	0	1	0
1064	1	38	1	3	1	1	0	21.22	1639.5	27.325	0	1	0
1065	1	61	1	3	1	1	0	10.53	905.9	15.0983	0	1	0
1066	0	45	1	2	1	1	0	10.19	911.6	15.1933	0	1	0
1067	1	32	1	2	1	1	0	144.73	6439.4	107.323	0	1	0
1068	1	32	1	1	1	1	0	144.73	6439.4	107.323	0	1	0
1069	1	32	1	2	1	1	0	144.73	6439.4	107.323	0	1	0
1070	0	49	1	4	1	1	0	68.89	3521.8	58.6967	0	1	0
1071	0	51	1	4	1	1	0	68.89	3521.8	58.6967	0	1	0
1072	0	42	1	1	1	1	0	17.76	1287.5	21.4583	0	1	0
1073	0	42	1	2	1	1	0	17.76	1287.5	21.4583	0	1	0
1074	0	37	1	6	1	1	1	823.82	35914.6	598.577	27	1	1
1075	0	82	1	2	1	1	0	9.16	816.6	13.61	0	1	0
1076	1	69	1	5	1	1	0	32.56	2551.6	42.5267	5	1	0
1077	0	73	1	3	1	1	0	51.66	4229	70.4833	0	1	0
1078	1	35	1	3	1	1	0	74.39	3765.5	62.7583	0	1	0
1079	1	59	1	3	1	1	0	22.04	1418.3	23.6383	0	1	0
1080	0	42	1	2	1	1	0	8.97	825.5	13.7583	0	1	0
1081	0	42	1	1	1	1	0	8.97	825.5	13.7583	0	1	0
1082	0	63	1	2	1	1	0	9.95	850.7	14.1783	0	1	0
1083	0	63	1	1	1	1	0	9.95	850.7	14.1783	0	1	0
1084	0	60	1	1	1	1	0	84.34	4310.5	71.8417	0	1	0
1085	0	60	1	2	1	1	0	84.34	4310.5	71.8417	0	1	0
1086	0	68	1	1	1	1	0	25.82	1591.5	26.525	0	1	0
1087	0	68	1	2	1	1	0	25.82	1591.5	26.525	0	1	0
1088	0	58	1	7	1	0	0	42.97	2903.5	48.3917	20	1	0
1089	0	49	1	2	1	1	0	68.89	3521.8	58.6967	0	1	0
1090	0	49	1	2	1	1	0	68.89	3521.8	58.6967	0	1	0
1091	0	49	1	2	1	1	0	68.89	3521.8	58.6967	0	1	0
1092	0	49	1	5	1	1	0	68.89	3521.8	58.6967	0	1	0
1093	1	69	1	5	1	1	0	32.56	2551.6	42.5267	0	1	0
1094	1	69	1	2	1	1	0	32.56	2551.6	42.5267	0	1	0
1095	0	64	1	4	1	1	0	5.23	547.9	9.13167	0	1	0
1096	0	64	1	4	1	1	0	5.23	547.9	9.13167	0	1	0
1097	0	64	1	4	1	1	0	5.23	547.9	9.13167	0	1	0
1098	1	58	1	2	1	0	0	306.16	13124	218.733	0	1	0
1099	1	50	1	4	1	1	0	5.23	547.9	9.13167	0	1	0
1100	1	58	1	2	1	0	0	306.16	13124	218.733	0	1	0
1101	1	50	1	4	1	1	0	5.23	547.9	9.13167	0	1	0
1102	1	50	1	4	1	1	0	5.23	547.9	9.13167	0	1	0
1103	0	63	1	2	1	1	0	42.12	3136.9	52.2817	0	1	0
1104	0	63	1	4	1	1	0	42.12	3136.9	52.2817	0	1	0
1105	0	63	1	2	1	1	0	42.12	3136.9	52.2817	0	1	0
1106	0	63	1	4	1	1	0	42.12	3136.9	52.2817	0	1	0
1107	0	63	1	4	1	1	0	42.12	3136.9	52.2817	0	1	0
1108	1	44	1	3	1	1	0	16.87	1379.7	22.995	0	1	0
1109	0	49	1	4	1	1	0	68.89	3521.8	58.6967	0	1	0
1110	0	49	1	4	1	1	0	68.89	3521.8	58.6967	0	1	0
1111	0	49	1	4	1	1	0	68.89	3521.8	58.6967	0	1	0
1112	0	40	1	4	1	1	0	10.37	905.8	15.0967	0	1	0
1113	0	40	1	4	1	1	0	10.37	905.8	15.0967	0	1	0
1114	0	40	1	4	1	1	0	10.37	905.8	15.0967	0	1	0
1115	0	40	1	2	1	1	0	10.37	905.8	15.0967	0	1	0
1116	0	60	0	2	1	1	0	25.9	1944.2	32.4033	0	1	0
1117	1	55	1	2	1	1	0	21.34	1552.6	25.8767	0	1	0
1118	1	55	1	1	1	1	0	21.34	1552.6	25.8767	0	1	0
1119	0	91	0	4	1	1	0	631.44	25482.4	424.707	0	1	0
1120	0	91	0	2	1	1	0	631.44	25482.4	424.707	0	1	0
1121	0	91	0	4	1	1	0	631.44	25482.4	424.707	0	1	0
1122	1	33	1	2	1	1	0	10.19	911.6	15.1933	0	1	0
1123	0	63	1	1	1	1	0	51.66	4229	70.4833	0	1	0
1124	0	63	1	2	1	1	0	51.66	4229	70.4833	0	1	0
1125	1	46	1	4	1	1	0	73.37	4170.6	69.51	0	1	0
1126	1	46	1	2	1	1	0	73.37	4170.6	69.51	0	1	0
1127	1	46	1	4	1	1	1	73.37	4170.6	69.51	0	1	0
1128	0	54	1	4	1	0	1	109.39	5062.3	84.3717	9	1	0
1129	0	54	1	4	1	1	0	109.39	5062.3	84.3717	0	1	0
1130	0	54	1	4	1	1	0	109.39	5062.3	84.3717	0	1	0
1131	0	36	1	6	1	1	1	1019.09	41784.4	696.407	0	1	0
1132	0	52	1	6	1	1	1	51.66	4229	70.4833	0	1	0
1133	0	42	1	7	1	1	0	10.86	822	13.7	0	1	0
1134	1	41	0	1	1	1	0	12.34	1026.7	17.1117	0	1	0
1135	0	63	1	1	1	1	0	4.84	443.6	7.39333	0	1	0
1136	0	63	1	2	1	1	0	4.84	443.6	7.39333	0	1	0
1137	1	77	1	1	1	1	0	60.59	3091.5	51.525	0	1	0
1138	1	77	1	2	1	1	0	60.59	3091.5	51.525	0	1	0
1139	0	61	1	1	1	1	0	62.08	3240.2	54.0033	0	1	0
1140	0	61	1	2	1	1	0	62.08	3240.2	54.0033	0	1	0
1141	0	37	1	1	1	1	0	21.46	1651.5	27.525	1	1	0
1142	1	61	1	5	1	1	0	16.87	1147.6	19.1267	0	1	0
1143	0	46	0	2	1	1	0	26.88	2018	33.6333	0	1	0
1144	0	46	0	2	1	1	0	26.88	2018	33.6333	0	1	0
1145	0	79	1	1	1	0	0	395.22	17378.2	289.637	1	1	1
1146	0	65	1	4	1	0	0	58.85	3114.8	51.9133	0	1	0
1147	0	65	1	2	1	0	0	58.85	3114.8	51.9133	0	1	0
1148	0	65	1	2	1	0	0	58.85	3114.8	51.9133	0	1	0
1149	0	65	1	4	1	0	0	58.85	3114.8	51.9133	0	1	0
1150	0	65	1	4	1	0	0	58.85	3114.8	51.9133	0	1	0
1151	1	42	1	3	1	1	0	13.39	1340.9	22.3483	0	1	0
1152	1	42	1	2	1	1	0	13.39	1340.9	22.3483	0	1	0
1153	1	56	1	3	1	1	0	10.61	897.7	14.9617	0	1	0
1154	0	46	1	2	1	1	0	11.97	998.4	16.64	0	1	0
1155	0	78	1	1	1	1	0	9.95	850.7	14.1783	0	1	0
1156	0	57	1	2	1	1	0	86.76	4359.2	72.6533	0	1	0
1157	0	57	1	2	1	1	0	86.76	4359.2	72.6533	0	1	0
1158	0	60	1	5	1	1	0	23.14	1553	25.8833	0	1	0
1159	0	47	1	2	1	1	0	335.91	14220.6	237.01	0	1	0
1160	0	47	1	2	1	1	0	335.91	14220.6	237.01	0	1	0
1161	0	47	1	2	1	1	0	335.91	14220.6	237.01	0	1	0
1162	0	63	1	2	1	1	0	35.26	2249	37.4833	0	1	0
1163	0	63	1	1	1	1	0	35.26	2249	37.4833	0	1	0
1164	0	63	1	2	1	1	0	35.26	2249	37.4833	0	1	0
1165	0	33	0	1	1	1	0	9.16	816.6	13.61	0	1	0
1166	1	71	0	2	1	1	0	43.05	2459.3	40.9883	0	1	0
1167	1	71	0	1	1	1	0	43.05	2459.3	40.9883	0	1	0
1168	1	71	0	2	1	1	0	43.05	2459.3	40.9883	0	1	0
1169	0	77	0	2	1	1	0	51.66	4229	70.4833	0	1	0
1170	0	77	0	1	1	1	0	51.66	4229	70.4833	0	1	0
1171	1	24	1	3	1	1	0	43.05	2459.3	40.9883	0	1	0
1172	1	80	1	2	1	1	0	63.56	3486	58.1	0	1	0
1173	1	80	1	1	1	1	0	63.56	3486	58.1	0	1	0
1174	0	58	1	1	1	1	0	1068.43	45697.9	761.632	0	1	0
1175	1	80	1	2	1	1	0	63.56	3486	58.1	0	1	0
1176	1	80	1	2	1	1	0	63.56	3486	58.1	0	1	0
1177	0	41	1	2	1	1	0	56.58	3004.1	50.0683	2	1	0
1178	0	46	1	3	1	1	0	17.76	1287.5	21.4583	0	1	0
1179	1	34	1	3	1	1	0	12.58	1074.9	17.915	0	1	0
1180	1	37	1	2	1	1	0	1134	46668.8	777.813	0	1	0
1181	1	37	1	2	1	1	0	1134	46668.8	777.813	0	1	0
1182	1	37	1	2	1	1	0	1134	46668.8	777.813	0	1	0
1183	1	18	0	4	1	1	0	12.49	1028.4	17.14	0	1	0
1184	1	55	1	2	1	1	0	55.89	3121.2	52.02	0	1	0
1185	1	55	1	1	1	1	0	55.89	3121.2	52.02	0	1	0
1186	0	67	1	4	1	1	0	216.29	9986.5	166.442	0	1	0
1187	0	67	1	4	1	1	0	216.29	9986.5	166.442	0	1	0
1188	0	67	1	2	1	1	0	216.29	9986.5	166.442	0	1	0
1189	0	67	1	2	1	1	0	216.29	9986.5	166.442	0	1	0
1190	0	67	1	4	1	1	0	216.29	9986.5	166.442	0	1	0
1191	0	71	1	4	1	0	0	53.65	2864.9	47.7483	0	1	0
1192	0	71	1	4	1	0	0	53.65	2864.9	47.7483	0	1	0
1193	0	71	1	4	1	0	0	53.65	2864.9	47.7483	0	1	0
1194	1	55	0	5	1	1	0	88.66	4487	74.7833	0	1	0
1195	0	25	1	4	1	1	0	5.23	547.9	9.13167	0	1	0
1196	0	39	1	1	1	0	0	31.34	2321.3	38.6883	10	1	0
1197	1	37	1	2	1	1	0	5.23	547.9	9.13167	0	1	0
1198	1	37	1	2	1	1	0	5.23	547.9	9.13167	0	1	0
1199	1	37	1	1	1	1	0	5.23	547.9	9.13167	0	1	0
1200	1	36	1	4	1	1	0	7.25	624.6	10.41	0	1	0
1201	1	36	1	2	1	1	0	7.25	624.6	10.41	0	1	0
1202	1	36	1	4	1	1	0	7.25	624.6	10.41	0	1	0
1203	1	36	1	4	1	1	0	7.25	624.6	10.41	0	1	0
1204	1	18	0	4	1	1	0	12.49	1028.4	17.14	0	1	0
1205	1	18	0	2	1	1	0	12.49	1028.4	17.14	0	1	0
1206	1	69	1	2	1	1	0	21.6	1464.4	24.4067	0	1	0
1207	1	69	1	3	1	1	0	21.6	1464.4	24.4067	0	1	0
1208	1	41	1	2	1	1	0	26.88	2018	33.6333	0	1	0
1209	1	41	1	1	1	1	0	26.88	2018	33.6333	0	1	0
1210	1	75	0	1	1	1	0	268.79	11207.5	186.792	0	1	0
1211	0	55	1	1	1	1	0	57.09	3027.4	50.4567	0	1	0
1212	0	55	1	2	1	1	0	57.09	3027.4	50.4567	0	1	0
1213	0	65	1	4	1	0	0	58.85	3114.8	51.9133	0	1	0
1214	0	65	1	4	1	0	0	58.85	3114.8	51.9133	0	1	0
1215	0	65	1	4	1	0	0	58.85	3114.8	51.9133	0	1	0
1216	1	56	1	2	1	1	0	25.82	1591.5	26.525	0	1	0
1217	1	56	1	6	1	1	1	25.82	1591.5	26.525	0	1	0
1218	1	86	0	4	1	0	0	366.71	15993.8	266.563	0	1	1
1219	1	86	0	4	1	0	0	366.71	15993.8	266.563	0	1	0
1220	1	86	0	2	1	0	0	366.71	15993.8	266.563	0	1	0
1221	1	86	0	4	1	0	0	366.71	15993.8	266.563	0	1	0
1222	1	49	0	1	1	1	0	89	4488.9	74.815	0	1	0
1223	1	49	0	2	1	1	0	89	4488.9	74.815	0	1	0
1224	1	55	0	4	1	1	0	88.66	4487	74.7833	0	1	0
1225	1	55	0	4	1	1	0	88.66	4487	74.7833	0	1	0
1226	1	55	0	4	1	1	0	88.66	4487	74.7833	0	1	0
1227	0	27	1	4	1	1	0	54.52	2897	48.2833	0	1	0
1228	0	27	1	4	1	1	0	54.52	2897	48.2833	0	1	0
1229	0	27	1	4	1	1	0	54.52	2897	48.2833	0	1	0
1230	0	46	1	3	1	1	0	5.89	548.6	9.14333	0	1	0
1231	1	39	1	2	1	1	0	16.87	1147.6	19.1267	0	1	0
1232	1	39	1	2	1	1	0	16.87	1147.6	19.1267	0	1	0
1233	1	51	1	3	1	1	0	14.48	1011.7	16.8617	0	1	0
1234	1	68	1	3	1	1	0	18.98	1341.6	22.36	0	1	0
1235	1	69	1	5	1	1	0	113.38	5237.2	87.2867	0	1	0
1236	1	69	1	5	1	1	1	113.38	5237.2	87.2867	0	1	0
1237	0	54	0	4	1	1	0	10.97	920.5	15.3417	0	1	0
1238	0	54	0	2	1	1	0	10.97	920.5	15.3417	0	1	0
1239	0	54	1	1	1	1	0	53.2	2914	48.5667	0	1	0
1240	0	74	1	2	1	1	0	1274.91	56552	942.533	0	1	0
1241	0	74	1	2	1	1	0	1274.91	56552	942.533	0	1	0
1242	0	93	0	4	1	0	0	8.12	715	11.9167	0	1	0
1243	0	68	1	4	1	0	0	8.52	717.9	11.965	0	1	0
1244	1	76	0	4	1	0	0	7.56	619.4	10.3233	0	1	0
1245	1	55	1	5	1	1	0	140.61	6245.6	104.093	0	1	0
1246	1	72	0	5	1	1	0	9.95	850.7	14.1783	0	1	0
1247	1	72	0	4	1	1	0	9.95	850.7	14.1783	0	1	0
1248	1	72	0	4	1	1	0	9.95	850.7	14.1783	0	1	0
1249	0	47	1	2	1	1	0	141.1	6207	103.45	0	1	0
1250	0	47	1	2	1	1	0	141.1	6207	103.45	0	1	0
1251	0	47	1	2	1	1	0	141.1	6207	103.45	0	1	0
1252	0	24	1	3	1	1	0	699.63	29707.3	495.122	0	1	0
1253	1	31	1	2	1	1	0	60.46	3226.4	53.7733	0	1	0
1254	1	31	1	2	1	1	0	60.46	3226.4	53.7733	0	1	0
1255	0	56	0	1	1	1	0	12.29	1007.1	16.785	0	1	0
1256	0	56	0	2	1	1	0	12.29	1007.1	16.785	0	1	0
1257	1	61	1	2	1	1	0	61.1	3467.6	57.7933	0	1	0
1258	1	61	1	2	1	1	0	61.1	3467.6	57.7933	0	1	0
1259	1	64	1	2	1	1	0	42.97	2903.5	48.3917	0	1	0
1260	0	66	1	2	1	1	0	46.88	2845.5	47.425	0	1	0
1261	0	66	1	1	1	1	0	46.88	2845.5	47.425	0	1	0
1262	0	80	1	1	1	1	0	21.46	1651.5	27.525	0	1	0
1263	1	69	0	2	1	1	0	244.06	10934.3	182.238	0	1	0
1264	1	69	0	1	1	1	0	244.06	10934.3	182.238	0	1	0
1265	0	55	1	2	1	1	0	49.5	2654.9	44.2483	0	1	0
1266	0	55	1	1	1	1	0	49.5	2654.9	44.2483	0	1	0
1267	0	49	1	4	1	1	0	7.25	624.6	10.41	0	1	0
1268	0	49	1	4	1	1	0	7.25	624.6	10.41	0	1	0
1269	0	49	1	4	1	1	0	7.25	624.6	10.41	0	1	0
1270	0	57	1	5	1	1	0	19.38	1590.2	26.5033	2	1	1
1271	0	57	1	5	1	1	1	19.38	1590.2	26.5033	0	1	0
1272	1	72	1	4	1	0	0	900.54	39383.1	656.385	1	1	1
1273	1	72	1	4	1	0	0	900.54	39383.1	656.385	0	1	0
1274	1	72	1	2	1	0	0	900.54	39383.1	656.385	0	1	0
1275	1	72	1	4	1	0	0	900.54	39383.1	656.385	0	1	0
1276	1	71	0	2	1	1	0	22.75	1836.9	30.615	0	1	0
1277	1	33	1	2	1	1	0	150.97	6697.3	111.622	0	1	0
1278	1	33	1	2	1	1	0	150.97	6697.3	111.622	0	1	0
1279	1	33	1	2	1	1	0	150.97	6697.3	111.622	0	1	0
1280	0	34	1	4	1	1	0	28.97	2191.8	36.53	0	1	0
1281	0	34	1	4	1	1	0	28.97	2191.8	36.53	0	1	0
1282	0	49	1	4	1	1	0	68.89	3521.8	58.6967	0	1	0
1283	0	35	1	3	1	1	0	19.25	1400.7	23.345	2	1	0
1284	1	55	1	3	1	0	0	21.6	1464.4	24.4067	6	1	0
1285	0	76	1	2	1	1	0	42.97	2903.5	48.3917	0	1	0
1286	0	76	1	2	1	1	0	42.97	2903.5	48.3917	0	1	0
1287	0	59	1	1	1	1	0	16.79	1253.2	20.8867	0	1	0
1288	0	59	1	2	1	1	0	16.79	1253.2	20.8867	0	1	0
1289	1	87	0	2	1	1	0	88.55	4495.3	74.9217	0	1	0
1290	1	87	0	4	1	1	0	88.55	4495.3	74.9217	0	1	0
1291	1	87	0	4	1	1	0	88.55	4495.3	74.9217	0	1	0
1292	1	87	0	4	1	1	0	88.55	4495.3	74.9217	0	1	0
1293	0	55	1	1	1	1	0	49.5	2654.9	44.2483	0	1	0
1294	0	55	1	2	1	1	0	49.5	2654.9	44.2483	0	1	0
1295	1	58	1	1	1	1	0	10.08	902.7	15.045	0	1	0
1296	1	58	1	2	1	1	0	10.08	902.7	15.045	0	1	0
1297	1	53	1	3	1	1	0	22.04	1418.3	23.6383	0	1	0
1298	0	66	1	1	1	1	0	10.08	902.7	15.045	0	1	0
1299	0	66	1	2	1	1	0	10.08	902.7	15.045	0	1	0
1300	1	55	0	2	1	1	0	51.83	2743.9	45.7317	0	1	0
1301	1	55	0	1	1	1	0	51.83	2743.9	45.7317	0	1	0
1302	1	67	1	7	1	1	0	51.66	4229	70.4833	4	1	0
1303	0	48	1	2	1	1	0	37.47	2649.7	44.1617	0	1	0
1304	0	52	1	2	1	1	0	10.97	920.5	15.3417	0	1	0
1305	0	52	1	1	1	1	0	10.97	920.5	15.3417	0	1	0
1306	1	39	1	2	1	1	0	8.63	759.5	12.6583	68	4	0
1307	0	36	1	3	1	1	0	55.74	3000.5	50.0083	0	1	0
1308	1	46	1	3	1	1	0	23.14	1553	25.8833	0	1	0
1309	0	43	1	2	1	0	0	5.89	548.6	9.14333	0	1	0
1310	0	65	1	5	1	1	0	325.12	14638.8	243.98	0	1	0
1311	1	70	0	2	1	1	0	13	1084	18.0667	0	1	0
1312	1	70	0	1	1	1	0	13	1084	18.0667	0	1	0
1313	1	80	0	5	1	1	0	108.94	5324.7	88.745	0	1	0
1314	1	80	0	5	1	1	1	108.94	5324.7	88.745	0	1	0
1315	0	46	1	2	1	0	0	88.77	4508.9	75.1483	0	1	0
1316	0	46	1	1	1	0	0	88.77	4508.9	75.1483	0	1	0
1317	0	48	1	2	1	1	0	51.66	4229	70.4833	0	1	0
1318	0	48	1	1	1	1	0	51.66	4229	70.4833	0	1	0
1319	1	68	1	2	1	1	0	78.52	4168.4	69.4733	0	1	0
1320	1	68	1	4	1	1	0	78.52	4168.4	69.4733	0	1	0
1321	1	68	1	4	1	1	0	78.52	4168.4	69.4733	0	1	0
1322	1	68	1	2	1	1	0	78.52	4168.4	69.4733	0	1	0
1323	0	83	0	4	1	1	0	42.97	2903.5	48.3917	0	1	0
1324	0	83	0	2	1	1	0	42.97	2903.5	48.3917	0	1	0
1325	0	83	0	4	1	1	0	42.97	2903.5	48.3917	0	1	0
1326	0	62	1	4	1	1	1	759.47	33765.5	562.758	4	1	0
1327	0	62	1	4	1	1	0	759.47	33765.5	562.758	0	1	0
1328	0	62	1	4	1	1	0	759.47	33765.5	562.758	0	1	0
1329	0	62	1	2	1	1	0	759.47	33765.5	562.758	0	1	0
1330	0	54	1	2	1	0	0	17.75	1397.2	23.2867	69	1	0
1331	0	55	1	3	1	1	0	21.46	1651.5	27.525	0	1	0
1332	1	65	1	3	1	1	0	51.08	2693.1	44.885	0	1	0
1333	1	43	0	4	1	1	0	16.46	1355.9	22.5983	0	1	0
1334	1	43	0	4	1	1	0	16.46	1355.9	22.5983	0	1	0
1335	1	43	0	4	1	1	0	16.46	1355.9	22.5983	0	1	0
1336	1	46	1	1	1	1	0	19.53	1399.7	23.3283	4	1	0
1337	1	34	1	2	1	1	0	9.19	821.7	13.695	0	1	0
1338	1	56	1	5	1	1	0	70.66	3685.8	61.43	0	1	0
1339	0	61	1	5	1	1	1	62.08	3240.2	54.0033	0	1	0
1340	0	42	1	6	1	1	1	67.87	3477.7	57.9617	36	1	0
1341	1	34	1	2	1	1	0	9.19	821.7	13.695	0	1	0
1342	1	71	1	2	1	1	0	5.23	547.9	9.13167	0	1	0
1343	0	63	1	5	1	1	0	224.02	9920.4	165.34	0	1	0
1344	1	29	1	4	1	1	0	21.46	1651.5	27.525	0	1	0
1345	1	29	1	2	1	1	0	21.46	1651.5	27.525	0	1	0
1346	1	81	0	2	1	1	0	51.66	4229	70.4833	0	1	0
1347	1	81	0	1	1	1	0	51.66	4229	70.4833	0	1	0
1348	0	40	1	5	1	1	0	80.68	3964	66.0667	0	1	0
1349	0	68	1	2	1	0	0	1279.19	55884.3	931.405	0	1	0
1350	0	56	1	5	1	1	0	95.59	4746.5	79.1083	0	1	0
1351	1	64	1	2	1	1	0	12.34	1026.7	17.1117	0	1	0
1352	1	64	1	1	1	1	0	12.34	1026.7	17.1117	0	1	0
1353	1	64	1	2	1	1	0	12.34	1026.7	17.1117	0	1	0
1354	0	42	1	2	1	1	0	1081.68	43248.1	720.802	0	1	0
1355	0	42	1	1	1	1	0	1081.68	43248.1	720.802	0	1	0
1356	0	42	1	2	1	1	0	1081.68	43248.1	720.802	0	1	0
1357	0	70	1	2	1	1	0	12.92	1056.8	17.6133	0	1	0
1358	0	70	1	1	1	1	0	12.92	1056.8	17.6133	0	1	0
1359	0	70	1	2	1	1	0	12.92	1056.8	17.6133	0	1	0
1360	0	41	1	6	1	1	1	18.98	1341.6	22.36	0	1	0
1361	1	48	1	2	1	1	0	77.97	3998.1	66.635	0	1	0
1362	1	44	1	2	1	1	0	27.97	2041.9	34.0317	0	1	0
1363	1	87	0	4	1	1	0	8.52	717.9	11.965	0	1	0
1364	1	87	0	4	1	1	0	8.52	717.9	11.965	0	1	0
1365	1	87	0	4	1	1	0	8.52	717.9	11.965	0	1	0
1366	1	94	0	4	1	1	0	46.57	2761.4	46.0233	0	1	0
1367	1	94	0	4	1	1	0	46.57	2761.4	46.0233	0	1	0
1368	1	94	0	2	1	1	0	46.57	2761.4	46.0233	0	1	0
1369	1	94	0	4	1	1	0	46.57	2761.4	46.0233	0	1	0
1370	1	54	1	2	1	1	0	18.2	1304.1	21.735	0	1	0
1371	1	54	1	1	1	1	0	18.2	1304.1	21.735	0	1	0
1372	1	75	1	1	1	1	0	42.97	2903.5	48.3917	0	1	0
1373	0	70	1	6	1	1	1	831.78	32674.3	544.572	0	1	0
1374	0	70	1	2	1	1	0	831.78	32674.3	544.572	0	1	0
1375	1	55	1	5	1	1	0	146.81	6504	108.4	0	1	0
1376	0	40	1	5	1	1	1	74.39	3765.5	62.7583	0	1	0
1377	0	40	1	5	1	1	1	74.39	3765.5	62.7583	0	1	0
1378	0	82	1	4	1	1	0	7.25	624.6	10.41	0	1	0
1379	0	82	1	4	1	1	0	7.25	624.6	10.41	0	1	0
1380	0	82	1	4	1	1	0	7.25	624.6	10.41	0	1	0
1381	0	63	1	5	1	1	1	70.94	3523.7	58.7283	0	1	0
1382	0	63	1	5	1	1	1	70.94	3523.7	58.7283	0	1	0
1383	0	55	1	2	1	1	0	68.72	3734.6	62.2433	0	1	0
1384	0	28	1	6	1	1	1	43.05	2459.3	40.9883	0	1	0
1385	0	28	1	2	1	1	0	43.05	2459.3	40.9883	0	1	0
1386	1	39	0	1	1	1	0	22.04	1418.3	23.6383	0	1	0
1387	0	72	1	1	1	1	0	5.89	548.6	9.14333	0	1	0
1388	0	72	1	2	1	1	0	5.89	548.6	9.14333	0	1	0
1389	1	68	1	1	1	1	0	10.08	902.7	15.045	0	1	0
1390	1	68	1	2	1	1	0	10.08	902.7	15.045	0	1	0
1391	0	50	0	7	1	0	0	30.6	2422.2	40.37	0	1	0
1392	0	57	0	1	1	1	0	22.04	1418.3	23.6383	0	1	0
1393	0	57	0	2	1	1	0	22.04	1418.3	23.6383	0	1	0
1394	0	80	1	6	1	1	1	5.23	547.9	9.13167	0	1	0
1395	0	55	1	1	1	1	0	216.29	9986.5	166.442	0	1	0
1396	0	55	1	2	1	1	0	216.29	9986.5	166.442	0	1	0
1397	1	75	1	1	1	1	0	42.97	2903.5	48.3917	0	1	0
1398	1	75	1	2	1	1	0	42.97	2903.5	48.3917	0	1	0
1399	0	42	1	2	1	1	0	1081.68	43248.1	720.802	0	1	0
1400	0	42	1	1	1	1	0	1081.68	43248.1	720.802	0	1	0
1401	0	44	1	4	1	1	0	22.69	1452.7	24.2117	0	1	0
1402	0	44	1	4	1	1	0	22.69	1452.7	24.2117	0	1	0
1403	0	44	1	2	1	1	0	22.69	1452.7	24.2117	0	1	0
1404	0	44	1	4	1	1	0	22.69	1452.7	24.2117	0	1	0
1405	0	42	1	2	1	1	0	47.88	2498.9	41.6483	0	1	0
1406	0	42	1	3	1	1	0	47.88	2498.9	41.6483	0	1	0
1407	1	50	1	5	1	1	1	52.37	2820.9	47.015	0	1	0
1408	0	39	1	3	1	1	0	8.25	723.1	12.0517	0	1	0
1409	1	41	1	2	1	1	0	69.45	3497.6	58.2933	0	1	0
1410	0	48	1	2	1	1	0	18.99	1492.5	24.875	0	1	0
1411	0	48	1	1	1	1	0	18.99	1492.5	24.875	0	1	0
1412	1	62	0	2	1	1	0	83.99	4168.9	69.4817	0	1	0
1413	1	62	0	2	1	1	0	83.99	4168.9	69.4817	0	1	0
1414	0	40	1	5	1	1	0	74.39	3765.5	62.7583	0	1	0
1415	0	71	1	1	1	1	0	1256.79	55215.6	920.26	0	1	0
1416	0	71	1	1	1	1	0	1256.79	55215.6	920.26	0	1	0
1417	0	71	1	2	1	1	0	1256.79	55215.6	920.26	0	1	0
1418	0	75	1	2	1	1	0	19.53	1399.7	23.3283	0	1	0
1419	0	47	1	4	1	0	0	25.21	1668.1	27.8017	0	1	0
1420	0	47	1	4	1	0	0	25.21	1668.1	27.8017	0	1	0
1421	0	47	1	4	1	0	0	25.21	1668.1	27.8017	0	1	0
1422	0	81	0	1	1	1	0	11.08	1005	16.75	0	1	0
1423	0	81	0	2	1	1	0	11.08	1005	16.75	0	1	0
1424	0	42	1	2	1	1	0	1081.68	43248.1	720.802	0	1	0
1425	0	42	1	1	1	1	0	1081.68	43248.1	720.802	0	1	0
1426	1	41	1	5	1	1	1	9.95	850.7	14.1783	0	1	0
1427	1	41	1	5	1	1	0	9.95	850.7	14.1783	19	1	1
1428	1	46	1	5	1	1	1	18.46	1477.9	24.6317	12	1	1
1429	1	94	0	2	1	1	0	46.57	2761.4	46.0233	0	1	0
1430	1	24	0	7	1	1	0	28.15	2080.4	34.6733	5	1	0
1431	0	66	1	6	1	1	1	77.48	3838.1	63.9683	0	1	0
1432	0	66	1	2	1	1	0	77.48	3838.1	63.9683	0	1	0
1433	1	49	1	3	1	1	0	12.36	1014	16.9	0	1	0
1434	1	35	1	4	1	1	1	8.52	717.9	11.965	7	1	0
1435	1	35	1	4	1	1	0	8.52	717.9	11.965	0	1	0
1436	1	35	1	2	1	1	0	8.52	717.9	11.965	0	1	0
1437	1	35	1	4	1	1	0	8.52	717.9	11.965	0	1	0
1438	0	54	1	2	1	1	0	25.21	1668.1	27.8017	0	1	0
1439	0	54	1	3	1	1	0	25.21	1668.1	27.8017	0	1	0
1440	0	28	1	4	1	1	0	54.52	2897	48.2833	0	1	0
1441	0	28	1	4	1	1	0	54.52	2897	48.2833	0	1	0
1442	0	28	1	2	1	1	0	54.52	2897	48.2833	0	1	0
1443	0	28	1	4	1	1	0	54.52	2897	48.2833	0	1	0
1444	0	42	1	1	1	1	0	1081.68	43248.1	720.802	0	1	0
1445	0	42	1	2	1	1	0	1081.68	43248.1	720.802	0	1	0
1446	0	82	0	2	1	0	0	9.74	842	14.0333	0	1	0
1447	0	82	0	1	1	0	0	9.74	842	14.0333	0	1	0
1448	1	70	1	1	1	0	0	64.44	3295.7	54.9283	0	1	0
1449	1	70	1	2	1	0	0	64.44	3295.7	54.9283	0	1	0
1450	1	70	1	1	1	1	0	258.4	12373.9	206.232	0	1	0
1451	1	70	1	2	1	1	0	258.4	12373.9	206.232	0	1	0
1452	0	74	1	2	1	1	0	134.61	7296.5	121.608	0	1	0
1453	0	74	1	1	1	1	0	134.61	7296.5	121.608	0	1	0
1454	0	71	1	5	1	1	1	53.65	2864.9	47.7483	0	1	0
1455	0	71	1	5	1	1	0	53.65	2864.9	47.7483	0	1	0
1456	1	74	1	2	1	1	0	89.51	4434.8	73.9133	0	1	0
1457	1	74	1	1	1	1	0	89.51	4434.8	73.9133	0	1	0
1458	1	74	1	2	1	1	0	89.51	4434.8	73.9133	0	1	0
1459	1	56	1	2	1	1	0	70.66	3685.8	61.43	0	1	0
1460	1	56	1	2	1	1	0	70.66	3685.8	61.43	0	1	0
1461	1	56	1	2	1	1	0	70.66	3685.8	61.43	0	1	0
1462	0	79	1	2	1	1	0	20.05	1638.4	27.3067	0	1	0
1463	0	79	1	1	1	1	0	20.05	1638.4	27.3067	0	1	0
1464	1	64	1	1	1	1	0	50.46	2641.4	44.0233	0	1	0
1465	1	51	1	2	1	1	0	10.19	911.6	15.1933	0	1	0
1466	1	51	1	2	1	1	0	10.19	911.6	15.1933	0	1	0
1467	1	24	0	2	1	1	0	265.15	11220	187	0	1	0
1468	1	24	0	2	1	1	0	265.15	11220	187	0	1	0
1469	0	53	1	4	1	0	1	112.96	5895.4	98.2567	2	1	1
1470	0	53	1	4	1	0	0	112.96	5895.4	98.2567	0	1	0
1471	0	53	1	4	1	0	0	112.96	5895.4	98.2567	0	1	0
1472	1	45	1	2	1	1	0	12.49	1028.4	17.14	0	1	0
1473	1	45	1	3	1	1	0	12.49	1028.4	17.14	0	1	0
1474	0	74	1	2	1	1	0	30.6	2422.2	40.37	0	1	0
1475	0	62	0	2	1	1	0	15.92	1214.6	20.2433	0	1	0
1476	0	62	0	1	1	1	0	15.92	1214.6	20.2433	0	1	0
1477	0	60	1	2	1	1	0	18.46	1477.9	24.6317	0	1	0
1478	1	63	1	3	1	1	0	12.34	1026.7	17.1117	0	1	0
1479	1	60	1	1	1	1	0	43.05	2459.3	40.9883	0	1	0
1480	1	60	1	2	1	1	0	43.05	2459.3	40.9883	0	1	0
1481	0	54	0	7	1	1	0	5.23	547.9	9.13167	4	1	0
1482	1	61	0	1	1	1	0	28.15	2080.4	34.6733	0	1	0
1483	1	61	0	2	1	1	0	28.15	2080.4	34.6733	0	1	0
1484	1	61	0	2	1	1	0	28.15	2080.4	34.6733	0	1	0
1485	1	49	1	2	1	1	0	9.16	816.6	13.61	0	1	0
1486	1	49	1	1	1	1	0	9.16	816.6	13.61	0	1	0
1487	0	75	1	4	1	1	0	19.53	1399.7	23.3283	0	1	0
1488	0	57	1	2	1	1	0	5.23	547.9	9.13167	0	1	0
1489	0	34	1	2	1	1	0	55.28	2946.7	49.1117	0	1	0
1490	0	34	1	3	1	1	0	55.28	2946.7	49.1117	0	1	0
1491	0	74	1	2	1	1	0	51.66	4229	70.4833	0	1	0
1492	0	74	1	1	1	1	0	51.66	4229	70.4833	0	1	0
1493	0	74	0	2	1	1	0	97.73	4663.7	77.7283	0	1	0
1494	0	74	0	1	1	1	0	97.73	4663.7	77.7283	0	1	0
1495	1	59	1	1	1	1	0	55.81	2978.2	49.6367	0	1	0
1496	0	48	1	3	1	1	0	58.85	3114.8	51.9133	4	1	0
1497	0	39	1	3	1	1	0	5.23	547.9	9.13167	0	1	0
1498	0	78	1	4	1	0	0	9.95	850.7	14.1783	0	1	0
1499	0	57	1	1	1	0	0	10.19	911.6	15.1933	0	1	0
1500	1	69	1	2	1	0	0	8.83	735.7	12.2617	0	1	0
1501	1	69	1	2	1	0	0	8.83	735.7	12.2617	0	1	0
1502	1	35	1	2	1	1	0	8.52	717.9	11.965	0	1	0
1503	0	65	1	2	1	1	0	325.12	14638.8	243.98	0	1	0
1504	0	75	1	4	1	1	0	19.53	1399.7	23.3283	0	1	0
1505	1	63	1	1	1	1	0	16.08	1370.4	22.84	0	1	0
1506	1	63	1	2	1	1	0	16.08	1370.4	22.84	0	1	0
1507	1	63	1	2	1	1	0	16.08	1370.4	22.84	0	1	0
1508	1	44	0	2	1	1	0	18.98	1341.6	22.36	0	1	0
1509	1	40	1	4	1	1	0	47.05	2701.3	45.0217	0	1	0
1510	1	40	1	4	1	1	0	47.05	2701.3	45.0217	0	1	0
1511	1	40	1	4	1	1	1	47.05	2701.3	45.0217	0	1	0
1512	1	40	1	2	1	1	0	47.05	2701.3	45.0217	0	1	0
1513	1	40	1	4	1	1	0	47.05	2701.3	45.0217	0	1	0
1514	0	58	1	2	1	1	0	5.23	547.9	9.13167	0	1	0
1515	0	48	1	7	1	1	0	5.23	547.9	9.13167	7	1	0
1516	0	64	1	2	1	1	0	7.7	643.6	10.7267	0	1	0
1517	0	64	1	2	1	1	0	7.7	643.6	10.7267	0	1	0
1518	0	48	1	1	1	1	0	51.66	4229	70.4833	16	1	0
1519	0	70	1	1	1	1	0	48.32	2928.1	48.8017	0	1	0
1520	0	79	1	1	1	0	0	475.87	22216.2	370.27	0	1	0
1521	0	79	1	2	1	0	0	475.87	22216.2	370.27	0	1	0
1522	0	65	1	2	1	1	0	325.12	14638.8	243.98	0	1	0
1523	1	46	1	2	1	1	0	73.37	4170.6	69.51	0	1	0
1524	0	75	1	1	1	1	0	52.36	2812.4	46.8733	0	1	0
1525	1	58	1	1	1	1	0	51.07	2754.3	45.905	0	1	0
1526	1	58	1	2	1	1	0	51.07	2754.3	45.905	0	1	0
1527	1	59	1	2	1	1	0	118.34	5795.7	96.595	0	1	0
1528	0	48	1	2	1	1	0	105.5	4961.2	82.6867	0	1	0
1529	1	76	1	3	1	1	0	28.97	2191.8	36.53	7	1	0
1530	1	69	0	2	1	1	0	373.18	15945.4	265.757	0	1	0
1531	1	69	0	1	1	1	0	373.18	15945.4	265.757	0	1	0
1532	1	61	1	2	1	1	0	22.04	1418.3	23.6383	0	1	0
1533	1	61	1	1	1	1	0	22.04	1418.3	23.6383	0	1	0
1534	1	63	1	1	1	1	0	8.52	717.9	11.965	0	1	0
1535	1	63	1	2	1	1	0	8.52	717.9	11.965	0	1	0
1536	0	66	1	1	1	0	0	10.97	920.5	15.3417	1	1	0
1537	0	67	1	1	1	1	0	88.55	4495.3	74.9217	0	1	0
1538	0	67	1	2	1	1	0	88.55	4495.3	74.9217	0	1	0
1539	1	71	1	1	1	0	0	17.76	1486.9	24.7817	0	1	0
1540	1	71	1	2	1	0	0	17.76	1486.9	24.7817	0	1	0
1541	1	57	1	2	1	1	0	75.06	3812	63.5333	0	1	0
1542	0	84	0	4	1	1	0	88.65	5281.8	88.03	0	1	0
1543	0	84	0	4	1	1	0	88.65	5281.8	88.03	0	1	0
1544	0	84	0	4	1	1	0	88.65	5281.8	88.03	0	1	0
1545	1	50	1	2	1	1	0	5.23	547.9	9.13167	0	1	0
1546	1	50	1	1	1	1	0	5.23	547.9	9.13167	0	1	0
1547	1	28	1	4	1	1	0	53.03	2798.3	46.6383	0	1	0
1548	1	28	1	4	1	1	0	53.03	2798.3	46.6383	0	1	0
1549	1	28	1	4	1	1	0	53.03	2798.3	46.6383	0	1	0
1550	1	54	1	6	1	1	1	80.43	3935.8	65.5967	0	1	0
1551	1	54	1	2	1	1	0	80.43	3935.8	65.5967	0	1	0
1552	1	59	0	2	1	1	0	21.34	1552.6	25.8767	0	1	0
1553	1	59	0	1	1	1	0	21.34	1552.6	25.8767	0	1	0
1554	0	18	0	2	1	1	0	8.12	715	11.9167	0	1	0
1555	0	65	1	2	1	1	0	325.12	14638.8	243.98	0	1	0
1556	1	26	1	1	1	1	0	83.99	4168.9	69.4817	0	1	0
1557	1	26	1	2	1	1	0	83.99	4168.9	69.4817	0	1	0
1558	1	64	1	4	1	1	0	51.66	4229	70.4833	0	1	0
1559	1	64	1	4	1	1	0	51.66	4229	70.4833	0	1	0
1560	1	64	1	4	1	1	0	51.66	4229	70.4833	0	1	0
1561	0	50	1	4	1	0	0	30.01	2208.5	36.8083	0	1	0
1562	0	50	1	2	1	0	0	30.01	2208.5	36.8083	0	1	0
1563	0	50	1	4	1	0	0	30.01	2208.5	36.8083	0	1	0
1564	0	50	1	4	1	0	0	30.01	2208.5	36.8083	0	1	0
1565	1	26	0	1	1	1	0	48.37	2805.2	46.7533	0	1	0
1566	0	50	1	1	1	1	0	1014.57	40200.9	670.015	0	1	0
1567	1	46	0	3	1	1	0	21.46	1651.5	27.525	11	1	0
1568	1	25	1	4	1	1	0	617.71	28610.7	476.845	0	1	0
1569	1	25	1	4	1	1	0	617.71	28610.7	476.845	0	1	0
1570	1	25	1	4	1	1	0	617.71	28610.7	476.845	0	1	0
1571	1	63	0	4	1	0	0	88.42	4495.5	74.925	0	1	0
1572	0	48	1	7	1	1	0	5.89	548.6	9.14333	1	1	0
1573	0	60	1	7	1	1	0	12.49	1028.4	17.14	0	1	0
1574	0	65	1	2	1	1	0	21.46	1651.5	27.525	0	1	0
1575	0	65	1	1	1	1	0	21.46	1651.5	27.525	0	1	0
1576	0	52	1	4	1	1	0	213.07	9530.6	158.843	0	1	0
1577	0	52	1	4	1	1	0	213.07	9530.6	158.843	0	1	0
1578	0	52	1	4	1	1	0	213.07	9530.6	158.843	0	1	0
1579	0	60	1	4	1	1	0	58.14	3094.8	51.58	0	1	0
1580	0	60	1	4	1	1	0	58.14	3094.8	51.58	0	1	0
1581	0	60	1	2	1	1	0	58.14	3094.8	51.58	0	1	0
1582	0	60	1	4	1	1	0	58.14	3094.8	51.58	0	1	0
1583	0	62	1	1	1	1	0	21.6	1464.4	24.4067	0	1	0
1584	0	62	1	2	1	1	0	21.6	1464.4	24.4067	0	1	0
1585	1	54	1	6	1	1	1	80.43	3935.8	65.5967	0	1	0
1586	1	54	1	2	1	1	0	80.43	3935.8	65.5967	0	1	0
1587	1	54	1	2	1	1	0	80.43	3935.8	65.5967	0	1	0
1588	1	60	0	4	1	1	0	342.7	14752.3	245.872	0	1	0
1589	1	60	0	4	1	1	0	342.7	14752.3	245.872	0	1	0
1590	1	60	0	4	1	1	0	342.7	14752.3	245.872	0	1	0
1591	0	60	1	4	1	1	0	51.66	4229	70.4833	0	1	0
1592	0	60	1	4	1	1	0	51.66	4229	70.4833	0	1	0
1593	0	60	1	4	1	1	1	51.66	4229	70.4833	0	1	0
1594	1	52	1	1	1	0	0	53.78	2852	47.5333	0	1	0
1595	1	81	1	1	1	0	0	10.34	893.7	14.895	0	1	0
1596	1	81	1	2	1	0	0	10.34	893.7	14.895	0	1	0
1597	0	81	1	6	1	1	1	5.23	547.9	9.13167	0	1	0
1598	0	81	1	2	1	1	0	5.23	547.9	9.13167	0	1	0
1599	0	46	1	1	1	1	0	22.26	1833.7	30.5617	0	1	0
1600	0	46	1	2	1	1	0	22.26	1833.7	30.5617	0	1	0
1601	0	60	1	6	1	1	1	103.12	5312.4	88.54	0	1	0
1602	0	60	1	2	1	1	0	103.12	5312.4	88.54	0	1	0
1603	0	60	1	1	1	1	0	103.12	5312.4	88.54	0	1	0
1604	1	73	0	1	1	1	0	12.18	1004.9	16.7483	0	1	0
1605	0	53	1	2	1	1	0	9.16	816.6	13.61	0	1	0
1606	0	53	1	3	1	1	0	9.16	816.6	13.61	0	1	0
1607	1	53	1	3	1	1	0	32.18	2426.6	40.4433	0	1	0
1608	0	78	1	2	1	1	0	5.23	547.9	9.13167	0	1	0
1609	0	78	1	1	1	1	0	5.23	547.9	9.13167	0	1	0
1610	1	38	1	7	1	1	0	5.23	547.9	9.13167	6	1	0
1611	0	45	0	7	1	1	0	10.86	822	13.7	0	1	0
1612	0	61	1	2	1	1	0	263.64	10995.7	183.262	0	1	0
1613	0	61	1	1	1	1	0	263.64	10995.7	183.262	0	1	0
1614	1	33	1	2	1	1	0	58.42	3086.6	51.4433	0	1	0
1615	1	33	1	1	1	1	0	58.42	3086.6	51.4433	0	1	0
1616	1	37	1	6	1	0	1	7.7	643.6	10.7267	2	1	0
1617	0	60	1	2	1	1	0	92.48	4340.3	72.3383	0	1	0
1618	0	60	1	1	1	1	0	92.48	4340.3	72.3383	0	1	0
1619	1	65	1	6	1	1	1	5.23	547.9	9.13167	0	1	0
1620	1	65	1	2	1	1	0	5.23	547.9	9.13167	0	1	0
1621	1	65	1	2	1	1	0	5.23	547.9	9.13167	0	1	0
1622	0	78	1	1	1	0	0	51.66	4229	70.4833	0	1	0
1623	0	39	1	7	1	0	0	26.08	1896.2	31.6033	1	1	0
1624	1	55	1	5	1	1	1	43.05	2459.3	40.9883	0	1	0
1625	1	55	1	5	1	1	0	43.05	2459.3	40.9883	0	1	0
1626	0	41	1	5	1	1	0	59.67	3190.8	53.18	8	1	0
1627	1	76	1	2	1	0	0	129.42	5945.4	99.09	0	1	0
1628	1	45	1	4	1	1	0	21.34	1552.6	25.8767	0	1	0
1629	1	45	1	4	1	1	0	21.34	1552.6	25.8767	0	1	0
1630	1	45	1	4	1	1	0	21.34	1552.6	25.8767	0	1	0
1631	1	66	1	2	1	1	0	5.23	547.9	9.13167	0	1	0
1632	1	66	1	2	1	1	0	5.23	547.9	9.13167	0	1	0
1633	0	64	1	1	1	1	0	9.95	850.7	14.1783	0	1	0
1634	0	64	1	2	1	1	0	9.95	850.7	14.1783	0	1	0
1635	1	58	1	3	1	1	0	42.97	2903.5	48.3917	9	1	0
1636	0	47	1	2	1	1	0	30.01	2208.5	36.8083	0	1	0
1637	0	47	1	1	1	1	0	30.01	2208.5	36.8083	0	1	0
1638	1	68	0	6	1	1	1	16.87	1147.6	19.1267	0	1	0
1639	1	68	0	2	1	1	0	16.87	1147.6	19.1267	0	1	0
1640	1	76	0	3	1	1	0	129.32	5704.5	95.075	0	1	0
1641	0	30	1	2	1	1	0	23.47	1828.8	30.48	0	1	0
1642	0	27	0	6	1	1	1	8.52	717.9	11.965	0	1	0
1643	0	66	1	4	1	0	0	19.85	1356	22.6	0	1	0
1644	0	73	1	4	1	0	0	12.62	1177.6	19.6267	0	1	0
1645	1	77	0	4	1	0	0	8.25	723.1	12.0517	0	1	0
1646	0	40	1	2	1	1	0	80.68	3964	66.0667	0	1	0
1647	0	40	1	2	1	1	0	80.68	3964	66.0667	0	1	0
1648	0	40	1	2	1	1	0	80.68	3964	66.0667	0	1	0
1649	0	21	0	4	1	1	0	12.91	1062.1	17.7017	0	1	0
1650	0	21	0	4	1	1	0	12.91	1062.1	17.7017	0	1	0
1651	1	46	1	5	1	1	0	1195.58	47036.3	783.938	0	1	0
1652	1	46	1	2	1	1	0	1195.58	47036.3	783.938	0	1	0
1653	1	46	1	2	1	1	0	1195.58	47036.3	783.938	0	1	0
1654	1	46	1	2	1	1	0	1195.58	47036.3	783.938	0	1	0
1655	0	44	1	3	1	1	0	10.19	911.6	15.1933	4	1	0
1656	1	44	1	3	1	0	0	12.23	1000.7	16.6783	3	1	0
1657	0	73	1	2	1	1	0	18.38	1378.4	22.9733	0	1	0
1658	0	73	1	1	1	1	0	18.38	1378.4	22.9733	0	1	0
1659	0	42	1	1	1	1	0	30.6	2422.2	40.37	0	1	0
1660	0	42	1	2	1	1	0	30.6	2422.2	40.37	0	1	0
1661	0	49	1	2	1	1	0	22.6	1645	27.4167	89	1	0
1662	0	49	1	3	1	1	0	22.6	1645	27.4167	0	1	0
1663	0	71	1	1	1	1	0	7.56	619.4	10.3233	0	1	0
1664	0	71	1	2	1	1	0	7.56	619.4	10.3233	0	1	0
1665	0	71	1	2	1	1	0	7.56	619.4	10.3233	0	1	0
1666	0	34	1	2	1	1	0	16.39	1330	22.1667	0	1	0
1667	0	34	1	2	1	1	0	16.39	1330	22.1667	0	1	0
1668	1	64	1	2	1	1	0	5.23	547.9	9.13167	0	1	0
1669	1	64	1	2	1	1	0	5.23	547.9	9.13167	0	1	0
1670	1	75	0	1	1	1	0	8.91	834.9	13.915	0	1	0
1671	1	75	0	2	1	1	0	8.91	834.9	13.915	0	1	0
1672	1	65	0	2	1	1	0	5.23	547.9	9.13167	0	1	0
1673	1	65	0	1	1	1	0	5.23	547.9	9.13167	0	1	0
1674	0	45	1	6	1	1	1	25.73	2124.4	35.4067	0	1	0
1675	1	53	1	5	1	1	0	57.59	3082.8	51.38	0	1	0
1676	1	65	1	2	1	1	0	10.19	911.6	15.1933	0	1	0
1677	1	65	1	1	1	1	0	10.19	911.6	15.1933	0	1	0
1678	0	85	1	4	1	1	0	161.53	7464.1	124.402	0	1	0
1679	0	85	1	4	1	0	0	161.53	7464.1	124.402	0	1	0
1680	0	85	1	2	1	0	0	161.53	7464.1	124.402	0	1	0
1681	0	85	1	4	1	0	0	161.53	7464.1	124.402	0	1	0
1682	1	64	1	4	1	1	0	51.66	4229	70.4833	0	1	0
1683	1	64	1	4	1	1	0	51.66	4229	70.4833	0	1	0
1684	1	64	1	4	1	1	0	51.66	4229	70.4833	0	1	0
1685	1	46	1	3	1	1	0	18.46	1477.9	24.6317	7	1	1
1686	1	72	0	7	1	1	0	43.05	2459.3	40.9883	0	1	0
1687	0	60	1	1	1	1	0	7.37	715.1	11.9183	0	1	0
1688	0	60	1	2	1	1	0	7.37	715.1	11.9183	0	1	0
1689	0	60	1	2	1	0	0	13.39	1340.9	22.3483	0	1	0
1690	0	60	1	2	1	0	0	13.39	1340.9	22.3483	0	1	0
1691	1	69	1	1	1	1	0	49.5	2654.9	44.2483	0	1	0
1692	1	69	1	2	1	1	0	49.5	2654.9	44.2483	0	1	0
1693	1	69	1	2	1	1	0	49.5	2654.9	44.2483	0	1	0
1694	0	48	1	4	1	1	0	26.54	1970.7	32.845	0	1	0
1695	0	48	1	4	1	1	0	26.54	1970.7	32.845	0	1	0
1696	0	48	1	4	1	0	1	26.54	1970.7	32.845	7	1	0
1697	0	52	1	4	1	1	1	213.07	9530.6	158.843	8	1	0
1698	0	52	1	4	1	1	0	213.07	9530.6	158.843	0	1	0
1699	0	52	1	2	1	1	0	213.07	9530.6	158.843	0	1	0
1700	0	52	1	4	1	1	0	213.07	9530.6	158.843	0	1	0
1701	0	48	1	2	1	1	0	26.73	2006.8	33.4467	0	1	0
1702	0	48	1	1	1	1	0	26.73	2006.8	33.4467	0	1	0
1703	1	59	1	2	1	1	0	43.05	2459.3	40.9883	0	1	0
1704	1	59	1	1	1	1	0	43.05	2459.3	40.9883	0	1	0
1705	0	46	1	5	1	1	1	34.87	2766.1	46.1017	0	1	0
1706	0	46	1	5	1	1	1	34.87	2766.1	46.1017	26	1	1
1707	1	57	1	4	1	1	0	9.41	816.7	13.6117	0	1	0
1708	1	57	1	4	1	1	0	9.41	816.7	13.6117	0	1	0
1709	1	57	1	2	1	1	0	9.41	816.7	13.6117	0	1	0
1710	1	57	1	4	1	1	0	9.41	816.7	13.6117	0	1	0
1711	1	62	0	1	1	1	0	10.78	917.8	15.2967	0	1	0
1712	1	62	0	2	1	1	0	10.78	917.8	15.2967	0	1	0
1713	1	65	1	2	1	1	0	75.76	3822.5	63.7083	0	1	0
1714	0	64	1	2	1	1	0	39.77	3037.6	50.6267	0	1	0
1715	0	64	1	2	1	1	0	39.77	3037.6	50.6267	0	1	0
1716	0	64	1	1	1	1	0	39.77	3037.6	50.6267	0	1	0
1717	0	63	1	4	1	1	1	55.81	2978.2	49.6367	0	1	0
1718	0	63	1	4	1	1	0	55.81	2978.2	49.6367	0	1	0
1719	0	63	1	2	1	1	0	55.81	2978.2	49.6367	0	1	0
1720	0	63	1	4	1	1	0	55.81	2978.2	49.6367	0	1	0
1721	0	77	1	2	1	1	0	29.45	2129.4	35.49	0	1	0
1722	1	57	1	2	1	1	0	34.87	2766.1	46.1017	0	1	0
1723	0	61	1	1	1	1	0	13.39	1340.9	22.3483	0	1	0
1724	0	61	1	2	1	1	0	13.39	1340.9	22.3483	0	1	0
1725	0	61	1	1	1	1	0	13.39	1340.9	22.3483	0	1	0
1726	1	46	1	1	1	1	0	24.01	1537.1	25.6183	0	1	0
1727	1	57	1	1	1	1	0	34.87	2766.1	46.1017	0	1	0
1728	1	45	1	3	1	1	0	59.98	3188.6	53.1433	3	1	0
1729	0	54	1	1	1	1	0	18.37	1471	24.5167	0	1	0
1730	1	57	1	2	1	1	0	84.34	4310.5	71.8417	0	1	0
1731	1	57	1	2	1	1	0	84.34	4310.5	71.8417	0	1	0
1732	1	65	1	1	1	1	0	75.76	3822.5	63.7083	0	1	0
1733	1	65	1	2	1	1	0	75.76	3822.5	63.7083	0	1	0
1734	0	72	1	1	1	1	0	16.87	1379.7	22.995	0	1	0
1735	0	72	1	2	1	1	0	16.87	1379.7	22.995	0	1	0
1736	1	59	1	1	1	1	0	42.97	2903.5	48.3917	0	1	0
1737	1	59	1	2	1	1	0	42.97	2903.5	48.3917	0	1	0
1738	0	72	1	1	1	1	0	12.18	1004.9	16.7483	0	1	0
1739	0	72	1	2	1	1	0	12.18	1004.9	16.7483	0	1	0
1740	1	41	1	2	1	1	0	137.71	6329.9	105.498	0	1	0
1741	1	41	1	2	1	1	0	137.71	6329.9	105.498	0	1	0
1742	1	41	1	2	1	1	0	137.71	6329.9	105.498	0	1	0
1743	0	47	1	2	1	1	0	9.95	850.7	14.1783	0	1	0
1744	0	47	1	1	1	1	0	9.95	850.7	14.1783	0	1	0
1745	0	47	1	2	1	1	0	9.95	850.7	14.1783	0	1	0
1746	1	69	1	2	1	1	0	9.95	850.7	14.1783	0	1	0
1747	1	69	1	1	1	1	0	9.95	850.7	14.1783	0	1	0
1748	1	69	1	2	1	1	0	9.95	850.7	14.1783	0	1	0
1749	1	46	1	4	1	1	0	111.35	5244.8	87.4133	0	1	0
1750	1	46	1	4	1	1	0	111.35	5244.8	87.4133	0	1	0
1751	0	46	1	3	1	1	0	45.07	2541	42.35	3	1	0
1752	0	26	1	1	1	1	0	57.09	3027.4	50.4567	0	1	0
1753	0	26	1	2	1	1	0	57.09	3027.4	50.4567	0	1	0
1754	0	26	1	2	1	1	0	57.09	3027.4	50.4567	0	1	0
1755	1	43	1	2	1	1	0	9.95	850.7	14.1783	0	1	0
1756	1	68	0	2	1	1	0	11.9	983.7	16.395	0	1	0
1757	1	68	0	1	1	1	0	11.9	983.7	16.395	0	1	0
1758	0	58	1	2	1	0	0	395.13	17390.9	289.848	0	1	0
1759	0	70	1	1	1	1	0	23.89	1925	32.0833	0	1	0
1760	0	70	1	2	1	1	0	23.89	1925	32.0833	0	1	0
1761	1	23	1	1	1	1	0	12.34	1026.7	17.1117	0	1	0
1762	0	76	1	2	1	0	0	7.37	715.1	11.9183	0	1	0
1763	0	76	1	2	1	0	0	7.37	715.1	11.9183	0	1	0
1764	0	76	1	1	1	0	0	7.37	715.1	11.9183	0	1	0
1765	0	63	1	2	1	1	0	55.81	2978.2	49.6367	0	1	0
1766	0	35	1	7	1	1	0	121.09	6088	101.467	0	1	0
1767	0	68	1	1	1	1	0	135.38	6112.9	101.882	22	1	1
1768	1	73	0	1	1	0	0	5.23	547.9	9.13167	1	1	1
1769	0	26	1	1	1	1	0	144.34	6277.8	104.63	0	1	0
1770	1	42	1	7	1	0	0	27.66	1691.9	28.1983	0	1	0
1771	0	85	1	2	1	1	0	161.53	7464.1	124.402	0	1	0
1772	0	69	1	3	1	0	0	19.52	1366.7	22.7783	1	1	0
1773	1	25	0	3	1	1	0	1431.46	65145.5	1085.76	0	1	0
1774	0	57	1	1	1	1	0	32.18	2426.6	40.4433	0	1	0
1775	0	70	1	2	1	1	0	23.67	1803.6	30.06	0	1	0
1776	0	70	1	2	1	1	0	23.67	1803.6	30.06	0	1	0
1777	0	70	1	1	1	1	0	23.67	1803.6	30.06	0	1	0
1778	0	28	1	7	1	1	0	26.48	2011.6	33.5267	2	1	0
1779	1	64	1	1	1	1	0	1181.93	50614.7	843.578	0	1	0
1780	1	64	1	2	1	1	0	1181.93	50614.7	843.578	0	1	0
1781	0	62	1	4	1	1	1	759.47	33765.5	562.758	0	1	0
1782	0	62	1	4	1	1	0	759.47	33765.5	562.758	0	1	0
1783	0	74	1	5	1	1	0	9.95	850.7	14.1783	7	1	0
1784	0	54	1	6	1	0	1	10.37	905.8	15.0967	0	1	0
1785	0	65	1	5	1	1	0	75.76	3822.5	63.7083	0	1	0
1786	0	65	1	5	1	1	1	75.76	3822.5	63.7083	0	1	0
1787	1	60	0	3	1	1	0	265.11	11134.8	185.58	0	1	0
1788	0	74	1	1	1	1	0	30.6	2422.2	40.37	0	1	0
1789	0	74	1	2	1	1	0	30.6	2422.2	40.37	0	1	0
1790	1	72	1	3	1	1	0	12.65	1096.1	18.2683	0	1	0
1791	0	76	1	1	1	1	0	12.4	1024.4	17.0733	0	1	0
1792	1	59	1	1	1	1	0	596.93	25850.8	430.847	0	1	0
1793	1	59	1	2	1	1	0	596.93	25850.8	430.847	0	1	0
1794	0	67	1	2	1	1	0	596.93	25850.8	430.847	0	1	0
1795	0	67	1	1	1	1	0	596.93	25850.8	430.847	0	1	0
1796	0	67	1	2	1	1	0	596.93	25850.8	430.847	0	1	0
1797	1	58	1	2	1	1	0	57.09	3027.4	50.4567	0	1	0
1798	1	58	1	1	1	1	0	57.09	3027.4	50.4567	0	1	0
1799	1	76	0	2	1	0	0	16.08	1342.6	22.3767	0	1	0
1800	1	76	0	2	1	0	0	16.08	1342.6	22.3767	0	1	0
1801	0	59	1	2	1	0	0	9.59	818.3	13.6383	0	1	0
1802	0	59	1	1	1	0	0	9.59	818.3	13.6383	0	1	0
1803	0	63	1	1	1	1	0	54.76	2910.6	48.51	0	1	0
1804	0	63	1	2	1	1	0	54.76	2910.6	48.51	0	1	0
1805	1	67	1	2	1	1	0	226.49	10007.2	166.787	0	1	0
1806	1	67	1	1	1	1	0	226.49	10007.2	166.787	0	1	0
1807	0	54	1	1	1	1	0	51.66	4229	70.4833	0	1	0
1808	0	54	1	2	1	1	0	51.66	4229	70.4833	0	1	0
1809	1	57	1	6	1	1	1	84.34	4310.5	71.8417	1	1	0
1810	1	36	1	1	1	1	0	5.23	547.9	9.13167	9	1	0
1811	1	36	1	1	1	1	0	5.23	547.9	9.13167	0	1	0
1812	1	43	1	1	1	1	0	133.73	5945.9	99.0983	0	1	0
1813	0	36	1	1	1	1	0	21.36	1424	23.7333	0	1	0
1814	0	36	1	2	1	1	0	67.98	3875.2	64.5867	0	1	0
1815	0	36	1	2	1	1	0	67.98	3875.2	64.5867	0	1	0
1816	0	36	1	2	1	1	0	67.98	3875.2	64.5867	0	1	0
1817	1	38	1	5	1	1	0	377.53	15922.7	265.378	0	1	0
1818	1	75	0	2	1	1	0	8.91	834.9	13.915	0	1	0
1819	1	75	0	1	1	1	0	8.91	834.9	13.915	0	1	0
1820	1	75	0	2	1	1	0	8.91	834.9	13.915	0	1	0
1821	1	40	1	2	1	0	0	56.58	3004.1	50.0683	92	1	0
1822	0	35	1	3	1	1	0	10.37	905.8	15.0967	2	1	0
1823	0	38	0	2	1	1	0	53.2	2903	48.3833	0	1	0
1824	0	38	0	3	1	1	0	53.2	2903	48.3833	0	1	0
1825	1	57	1	4	1	1	0	9.41	816.7	13.6117	0	1	0
1826	1	57	1	4	1	1	0	9.41	816.7	13.6117	0	1	0
1827	0	48	1	3	1	1	0	70.11	3507.9	58.465	1	1	0
1828	1	52	1	1	1	1	0	7.41	614.6	10.2433	0	1	0
1829	0	45	1	4	1	1	0	617.53	28604.4	476.74	0	1	0
1830	1	56	1	2	1	1	0	140.61	6245.6	104.093	3	1	0
1831	1	56	1	2	1	1	0	140.61	6245.6	104.093	3	1	0
1832	1	56	1	2	1	1	0	140.61	6245.6	104.093	3	1	0
1833	1	65	1	5	1	1	0	9.47	909.2	15.1533	3	1	0
1834	0	37	0	1	1	1	0	1357.21	60268.6	1004.48	0	1	0
1835	0	21	0	6	1	1	1	831.26	32596.8	543.28	0	1	0
1836	0	21	0	2	1	1	0	831.26	32596.8	543.28	0	1	0
1837	0	61	1	3	1	1	0	1137.24	48255	804.25	0	1	0
1838	0	50	1	1	1	1	0	49.97	2674.8	44.58	0	1	0
1839	0	50	1	2	1	1	0	49.97	2674.8	44.58	0	1	0
1840	1	52	1	2	1	1	0	12.85	1043.2	17.3867	0	1	0
1841	1	52	1	1	1	1	0	12.85	1043.2	17.3867	0	1	0
1842	1	52	1	2	1	1	0	12.85	1043.2	17.3867	0	1	0
1843	1	43	1	1	1	1	0	5.23	547.9	9.13167	0	1	0
1844	1	43	1	2	1	1	0	5.23	547.9	9.13167	0	1	0
1845	1	66	1	6	1	1	1	637.24	27528.8	458.813	0	1	0
1846	0	44	1	2	1	1	0	5.23	547.9	9.13167	0	1	0
1847	0	44	1	1	1	1	0	5.23	547.9	9.13167	0	1	0
1848	0	64	1	4	1	1	0	42.12	3136.9	52.2817	0	1	0
1849	0	64	1	4	1	1	0	42.12	3136.9	52.2817	0	1	0
1850	0	64	1	2	1	1	0	42.12	3136.9	52.2817	0	1	0
1851	0	64	1	4	1	1	0	42.12	3136.9	52.2817	0	1	0
1852	1	45	1	4	1	1	0	22.04	1418.3	23.6383	0	1	0
1853	1	45	1	4	1	1	0	22.04	1418.3	23.6383	0	1	0
1854	1	45	1	4	1	1	0	22.04	1418.3	23.6383	0	1	0
1855	1	48	1	2	1	1	0	11.85	975.8	16.2633	0	1	0
1856	1	48	1	1	1	1	0	11.85	975.8	16.2633	0	1	0
1857	1	54	1	2	1	1	0	8.52	717.9	11.965	0	1	0
1858	1	64	0	2	1	1	0	20.35	1420.8	23.68	0	1	0
1859	1	63	1	1	1	1	0	4.84	443.6	7.39333	0	1	0
1860	1	63	1	2	1	1	0	4.84	443.6	7.39333	0	1	0
1861	1	63	1	2	1	1	0	4.84	443.6	7.39333	0	1	0
1862	1	32	1	2	1	1	0	37.47	2649.7	44.1617	0	1	0
1863	1	32	1	3	1	1	0	37.47	2649.7	44.1617	0	1	0
1864	0	45	1	4	1	1	0	617.53	28604.4	476.74	0	1	0
1865	0	45	1	4	1	1	0	617.53	28604.4	476.74	0	1	0
1866	0	45	1	4	1	1	0	617.53	28604.4	476.74	0	1	0
1867	0	67	1	2	1	1	0	142.2	6248.6	104.143	0	1	0
1868	0	67	1	1	1	1	0	142.2	6248.6	104.143	0	1	0
1869	0	67	1	2	1	1	0	142.2	6248.6	104.143	0	1	0
1870	1	52	1	2	1	1	0	81.37	3974.4	66.24	0	1	0
1871	1	53	1	2	1	1	0	28.97	2191.8	36.53	0	1	0
1872	1	53	1	1	1	1	0	28.97	2191.8	36.53	0	1	0
1873	0	72	1	2	1	1	0	8.48	769.6	12.8267	0	1	0
1874	0	72	1	1	1	1	0	8.48	769.6	12.8267	0	1	0
1875	0	74	1	2	1	1	0	264.75	11467.1	191.118	0	1	0
1876	0	59	0	2	1	1	0	19.52	1366.7	22.7783	0	1	0
1877	0	59	0	1	1	1	0	19.52	1366.7	22.7783	0	1	0
1878	0	54	1	1	1	1	0	60.74	4285.3	71.4217	1	1	0
1879	1	45	1	4	1	1	1	1382.26	54887.6	914.793	0	1	0
1880	1	45	1	4	1	1	0	1382.26	54887.6	914.793	0	1	0
1881	1	45	1	4	1	1	0	1382.26	54887.6	914.793	0	1	0
1882	1	80	0	4	1	1	0	252.77	10881.2	181.353	0	1	0
1883	1	80	0	4	1	1	0	252.77	10881.2	181.353	0	1	0
1884	1	80	0	4	1	1	0	252.77	10881.2	181.353	0	1	0
1885	0	44	1	2	1	1	0	61.85	3183.8	53.0633	0	1	0
1886	0	74	1	1	1	1	0	77.67	3872.5	64.5417	0	1	0
1887	0	74	1	2	1	1	0	77.67	3872.5	64.5417	0	1	0
1888	0	25	1	3	1	1	0	30.6	2422.2	40.37	0	1	0
1889	0	25	1	2	1	1	0	30.6	2422.2	40.37	0	1	0
1890	1	83	0	1	1	1	0	58.85	3114.8	51.9133	0	1	0
1891	1	83	0	2	1	1	0	58.85	3114.8	51.9133	0	1	0
1892	1	70	1	1	1	0	0	81.06	4017	66.95	0	1	0
1893	0	78	1	4	1	1	0	10.97	920.5	15.3417	0	1	0
1894	0	49	1	4	1	1	1	51.66	4229	70.4833	0	1	0
1895	1	57	1	1	1	1	0	147.74	6463.2	107.72	0	1	0
1896	1	57	1	2	1	1	0	147.74	6463.2	107.72	0	1	0
1897	1	57	1	6	1	1	1	147.74	6463.2	107.72	0	1	0
1898	0	72	1	1	1	1	0	8.97	825.5	13.7583	0	1	0
1899	0	72	1	2	1	1	0	8.97	825.5	13.7583	0	1	0
1900	0	53	1	5	1	1	0	43.05	2459.3	40.9883	0	1	0
1901	0	58	1	7	1	1	0	8.52	733.1	12.2183	12	1	0
1902	0	76	1	1	1	1	0	103.71	5156.4	85.94	0	2	0
1903	0	76	1	2	1	1	0	103.71	5156.4	85.94	0	2	0
1904	0	67	1	2	1	1	0	23.14	1553	25.8833	0	2	0
1905	0	67	1	1	1	1	0	23.14	1553	25.8833	0	2	0
1906	0	34	1	7	1	1	0	28.97	2191.8	36.53	10	2	0
1907	1	77	0	2	1	1	0	7.25	624.6	10.41	0	2	0
1908	1	77	0	2	1	1	0	7.25	624.6	10.41	0	2	0
1909	1	25	1	5	1	1	0	9.41	816.7	13.6117	0	2	0
1910	0	56	1	3	1	1	0	62.87	3439.8	57.33	0	2	0
1911	1	53	1	3	1	1	0	12.29	1015.6	16.9267	0	2	0
1912	1	53	1	2	1	1	0	12.29	1015.6	16.9267	0	2	0
1913	1	25	1	3	1	1	0	9.41	816.7	13.6117	0	2	0
1914	0	28	1	4	1	1	0	54.52	2897	48.2833	0	2	0
1915	0	65	1	4	1	1	0	37.06	2489.3	41.4883	0	2	0
1916	1	54	1	1	1	1	0	59.18	3287.8	54.7967	0	2	0
1917	1	55	1	2	1	1	0	7.7	643.6	10.7267	0	2	0
1918	1	55	1	1	1	1	0	7.7	643.6	10.7267	0	2	0
1919	1	63	0	6	1	0	1	34.87	2766.1	46.1017	15	2	0
1920	1	63	0	2	1	1	0	34.87	2766.1	46.1017	0	2	0
1921	0	70	1	1	1	1	0	9.58	805.6	13.4267	0	2	0
1922	0	70	1	2	1	1	0	9.58	805.6	13.4267	0	2	0
1923	0	36	1	4	1	1	0	224.02	9920.4	165.34	15	2	0
1924	0	36	1	4	1	1	0	224.02	9920.4	165.34	0	2	0
1925	0	36	1	2	1	1	0	224.02	9920.4	165.34	0	2	0
1926	0	36	1	4	1	1	0	224.02	9920.4	165.34	0	2	0
1927	0	70	1	2	1	1	0	23.89	1925	32.0833	0	2	0
1928	1	78	1	2	1	1	0	60.59	3091.5	51.525	0	2	0
1929	1	78	1	1	1	1	0	60.59	3091.5	51.525	0	2	0
1930	1	52	1	2	1	1	0	12.85	1043.2	17.3867	0	2	0
1931	1	52	1	1	1	1	0	12.85	1043.2	17.3867	0	2	0
1932	1	77	0	4	1	1	0	88.26	4454.5	74.2417	0	2	0
1933	1	77	0	2	1	1	0	88.26	4454.5	74.2417	0	2	0
1934	1	77	0	4	1	1	0	88.26	4454.5	74.2417	0	2	0
1935	1	77	0	4	1	1	0	88.26	4454.5	74.2417	0	2	0
1936	0	71	1	1	1	1	0	96.14	5058.5	84.3083	0	2	0
1937	0	71	1	2	1	1	0	96.14	5058.5	84.3083	0	2	0
1938	0	58	1	5	1	1	0	24.01	1537.1	25.6183	0	2	0
1939	0	58	1	5	1	1	1	24.01	1537.1	25.6183	0	2	0
1940	0	42	1	4	1	1	1	5.23	547.9	9.13167	37	2	0
1941	0	42	1	4	1	1	0	5.23	547.9	9.13167	0	2	0
1942	0	42	1	4	1	1	0	5.23	547.9	9.13167	0	2	0
1943	0	54	1	4	1	1	0	26.43	1944.1	32.4017	0	2	0
1944	0	54	1	4	1	1	0	26.43	1944.1	32.4017	0	2	0
1945	0	49	1	4	1	1	0	51.66	4229	70.4833	0	2	0
1946	0	49	1	4	1	1	0	51.66	4229	70.4833	0	2	0
1947	0	49	1	4	1	1	0	51.66	4229	70.4833	0	2	0
1948	0	79	1	2	1	0	0	16.08	1370.4	22.84	0	2	0
1949	0	79	1	2	1	0	0	16.08	1370.4	22.84	0	2	0
1950	0	52	1	2	1	1	0	54.51	2888.4	48.14	0	2	0
1951	0	52	1	1	1	1	0	54.51	2888.4	48.14	0	2	0
1952	1	49	1	2	1	1	0	20.3	1422.3	23.705	0	2	0
1953	1	49	1	3	1	1	0	20.3	1422.3	23.705	0	2	0
1954	0	33	1	2	1	1	0	16.39	1330	22.1667	0	2	0
1955	0	33	1	3	1	1	0	16.39	1330	22.1667	0	2	0
1956	1	64	1	2	1	1	0	7.37	715.1	11.9183	0	2	0
1957	1	64	1	3	1	1	0	7.37	715.1	11.9183	0	2	0
1958	1	64	1	5	1	1	0	60.59	3091.5	51.525	0	2	0
1959	1	59	0	2	1	1	0	9.7	857.9	14.2983	0	2	0
1960	1	59	0	2	1	1	0	9.7	857.9	14.2983	0	2	0
1961	0	70	1	2	1	1	0	21.28	1662.4	27.7067	0	2	0
1962	0	70	1	1	1	1	0	21.28	1662.4	27.7067	0	2	0
1963	1	39	1	7	1	1	0	8.97	825.5	13.7583	1	2	0
1964	0	74	1	2	1	1	0	55.81	2978.2	49.6367	0	2	0
1965	0	74	1	1	1	1	0	55.81	2978.2	49.6367	0	2	0
1966	0	45	1	2	1	1	0	55.29	2907.2	48.4533	0	2	0
1967	0	45	1	1	1	1	0	55.29	2907.2	48.4533	0	2	0
1968	1	63	1	2	1	1	0	51.66	4229	70.4833	0	2	0
1969	1	63	1	2	1	1	0	51.66	4229	70.4833	0	2	0
1970	0	19	0	2	1	0	0	6.85	663.7	11.0617	0	2	0
1971	0	19	0	2	1	0	0	6.85	663.7	11.0617	0	2	0
1972	1	38	1	3	1	1	0	27.97	2041.9	34.0317	17	2	0
1973	1	63	0	2	1	1	0	16.5	1287.8	21.4633	0	2	0
1974	1	63	0	3	1	1	0	16.5	1287.8	21.4633	0	2	0
1975	1	66	1	2	1	1	0	59.18	3287.8	54.7967	0	2	0
1976	1	66	1	3	1	1	0	59.18	3287.8	54.7967	0	2	0
1977	0	66	1	5	1	1	1	26.88	2018	33.6333	0	2	0
1978	0	46	1	1	1	1	0	6.85	663.7	11.0617	0	2	0
1979	0	46	1	2	1	1	0	6.85	663.7	11.0617	0	2	0
1980	0	59	1	2	1	1	0	7.56	619.4	10.3233	0	2	0
1981	0	59	1	1	1	1	0	7.56	619.4	10.3233	0	2	0
1982	0	37	1	1	1	1	0	8.97	825.5	13.7583	0	2	0
1983	1	54	1	2	1	1	0	7.56	619.4	10.3233	0	2	0
1984	1	54	1	1	1	1	0	7.56	619.4	10.3233	0	2	0
1985	1	51	1	3	1	0	0	5.89	548.6	9.14333	17	2	0
1986	1	64	1	2	1	1	0	308.62	13261.1	221.018	0	2	0
1987	1	55	1	1	1	1	0	25.63	1918.5	31.975	0	2	0
1988	1	55	1	2	1	1	0	25.63	1918.5	31.975	0	2	0
1989	1	79	0	4	1	0	1	25.82	1597.3	26.6217	2	2	0
1990	1	79	0	4	1	1	0	25.82	1597.3	26.6217	0	2	0
1991	1	79	0	4	1	1	0	25.82	1597.3	26.6217	0	2	0
1992	1	40	1	1	1	1	0	51.66	4229	70.4833	0	2	0
1993	1	70	1	3	1	1	0	105.76	5200.1	86.6683	0	2	0
1994	0	56	1	2	1	1	0	55.15	2898.4	48.3067	0	2	0
1995	0	55	1	1	1	1	0	12.65	1096.1	18.2683	0	2	0
1996	0	55	1	2	1	1	0	12.65	1096.1	18.2683	0	2	0
1997	0	87	1	5	1	1	1	639.19	27140.8	452.347	0	2	0
1998	1	53	0	2	1	1	0	32.18	2426.6	40.4433	0	2	0
1999	1	53	0	1	1	1	0	32.18	2426.6	40.4433	0	2	0
[truncated: 11,837 more rows]
